# Supplementary material for: Insights into the Dekkera bruxellensis Genomic Landscape: Comparative Genomics Reveals Variations in Ploidy and Nutrient Utilisation Potential amongst Wine Isolates
Source: PLoS Genet. 2014 Feb 13;10(2):e1004161. doi: 10.1371/journal.pgen.1004161 (PMC3923673; doi:10.1371/journal.pgen.1004161)
Supplement: Dataset S1 — Calculated read coverage and estimated ploidy levels across D. bruxellensis strains. Observed coverage was calculated from a .bam file using samtools mpileup (v. 0.1.18) and custom scripts using a window of 5 kb and a step of 1 kb, with “average coverage” calculated as the average coverage across all windows. “Genomic position” references the centre of each window. (XLSX) [file pgen.1004161.s009.xlsx]

## Sheet: genomic copy number variation
genomic_position	strain	log2(observed_coverage/average_coverage)	log2_capped	contig	copy_number	estimated_strain_ploidy	assumed_ploidy(n=5 window)
2501	AWRI1608	0.000733371	0.000733371	AHIQ01000001.1|2501	3.00153	3	NA
3501	AWRI1608	-0.0192461	-0.0192461	AHIQ01000001.1|3501	2.96024	3	NA
4501	AWRI1608	-0.000157501	-0.000157501	AHIQ01000001.1|4501	2.99967	3	NA
5501	AWRI1608	0.025377	0.025377	AHIQ01000001.1|5501	3.05324	3	NA
6501	AWRI1608	0.112522	0.112522	AHIQ01000001.1|6501	3.24335	3	NA
7501	AWRI1608	0.175122	0.175122	AHIQ01000001.1|7501	3.38718	3	NA
8501	AWRI1608	0.229473	0.229473	AHIQ01000001.1|8501	3.51722	3	NA
9501	AWRI1608	0.182267	0.182267	AHIQ01000001.1|9501	3.404	3	NA
10501	AWRI1608	NA	NA	NA	3	3	NA
11501	AWRI1608	NA	NA	NA	3	3	NA
12501	AWRI1608	NA	NA	NA	3	3	NA
13501	AWRI1608	NA	NA	NA	3	3	NA
14501	AWRI1608	NA	NA	NA	3	3	NA
15501	AWRI1608	0.0433482	0.0433482	AHIQ01000002.1|3364	3.09151	3	NA
16501	AWRI1608	-0.0187191	-0.0187191	AHIQ01000002.1|4364	2.96133	3	NA
17501	AWRI1608	0.0125923	0.0125923	AHIQ01000002.1|5364	3.0263	3	3
18501	AWRI1608	0.00602654	0.00602654	AHIQ01000002.1|6364	3.01256	3	3
19501	AWRI1608	0.0397226	0.0397226	AHIQ01000002.1|7364	3.08375	3	3
20501	AWRI1608	-0.0115749	-0.0115749	AHIQ01000002.1|8364	2.97603	3	3
21501	AWRI1608	-0.0323048	-0.0323048	AHIQ01000002.1|9364	2.93357	3	3
22501	AWRI1608	-0.00251169	-0.00251169	AHIQ01000002.1|10364	2.99478	3	3
23501	AWRI1608	-0.0406828	-0.0406828	AHIQ01000002.1|11364	2.91658	3	3
24501	AWRI1608	-0.0420466	-0.0420466	AHIQ01000002.1|12364	2.91383	3	3
25501	AWRI1608	-0.0108045	-0.0108045	AHIQ01000002.1|13364	2.97762	3	NA
26501	AWRI1608	-0.00328216	-0.00328216	AHIQ01000002.1|14364	2.99318	3	NA
27501	AWRI1608	NA	NA	NA	3	3	NA
28501	AWRI1608	NA	NA	NA	3	3	NA
29501	AWRI1608	NA	NA	NA	3	3	NA
30501	AWRI1608	NA	NA	NA	3	3	NA
31501	AWRI1608	NA	NA	NA	3	3	NA
32501	AWRI1608	0.138042	0.138042	AHIQ01000003.1|3197	3.30123	3	NA
33501	AWRI1608	0.166092	0.166092	AHIQ01000003.1|4197	3.36605	3	NA
34501	AWRI1608	0.113739	0.113739	AHIQ01000003.1|5197	3.24609	3	NA
35501	AWRI1608	0.0946354	0.0946354	AHIQ01000003.1|6197	3.20339	3	NA
36501	AWRI1608	NA	NA	NA	3	3	NA
37501	AWRI1608	NA	NA	NA	3	3	NA
38501	AWRI1608	NA	NA	NA	3	3	NA
39501	AWRI1608	NA	NA	NA	3	3	NA
40501	AWRI1608	NA	NA	NA	3	3	NA
41501	AWRI1608	NA	NA	NA	3	3	NA
42501	AWRI1608	NA	NA	NA	3	3	NA
43501	AWRI1608	NA	NA	NA	3	3	NA
44501	AWRI1608	NA	NA	NA	3	3	NA
45501	AWRI1608	-0.212772	-0.212772	AHIQ01000005.1|3319	2.58863	3	NA
46501	AWRI1608	-0.127425	-0.127425	AHIQ01000005.1|4319	2.74639	3	NA
47501	AWRI1608	-0.275734	-0.275734	AHIQ01000005.1|5319	2.47809	3	3
48501	AWRI1608	-0.285541	-0.285541	AHIQ01000005.1|6319	2.4613	3	3
49501	AWRI1608	-0.23654	-0.23654	AHIQ01000005.1|7319	2.54634	3	3
50501	AWRI1608	-0.131408	-0.131408	AHIQ01000005.1|8319	2.73882	3	3
51501	AWRI1608	-0.0564568	-0.0564568	AHIQ01000005.1|9319	2.88487	3	3
52501	AWRI1608	0.0669437	0.0669437	AHIQ01000005.1|10319	3.14249	3	3
53501	AWRI1608	0.0668617	0.0668617	AHIQ01000005.1|11319	3.14231	3	3
54501	AWRI1608	-0.00877348	-0.00877348	AHIQ01000005.1|12319	2.98181	3	3
55501	AWRI1608	-0.0603142	-0.0603142	AHIQ01000005.1|13319	2.87717	3	3
56501	AWRI1608	-0.00945169	-0.00945169	AHIQ01000005.1|14319	2.98041	3	3
57501	AWRI1608	-0.0352311	-0.0352311	AHIQ01000005.1|15319	2.92763	3	3
58501	AWRI1608	-0.0464447	-0.0464447	AHIQ01000005.1|16319	2.90496	3	3
59501	AWRI1608	-0.0353748	-0.0353748	AHIQ01000005.1|17319	2.92733	3	3
60501	AWRI1608	0.00420117	0.00420117	AHIQ01000005.1|18319	3.00875	3	3
61501	AWRI1608	-0.119822	-0.119822	AHIQ01000005.1|19319	2.7609	3	3
62501	AWRI1608	-0.233968	-0.233968	AHIQ01000005.1|20319	2.55088	3	3
63501	AWRI1608	-0.254665	-0.254665	AHIQ01000005.1|21319	2.51455	3	3
64501	AWRI1608	-0.437485	-0.437485	AHIQ01000005.1|22319	2.21526	3	2
65501	AWRI1608	-0.496831	-0.496831	AHIQ01000005.1|23319	2.12598	3	2
66501	AWRI1608	-0.446203	-0.446203	AHIQ01000005.1|24319	2.20192	3	2
67501	AWRI1608	-0.330192	-0.330192	AHIQ01000005.1|25319	2.38629	3	NA
68501	AWRI1608	-0.677755	-0.677755	AHIQ01000005.1|26319	1.87541	3	NA
69501	AWRI1608	NA	NA	NA	3	3	NA
70501	AWRI1608	NA	NA	NA	3	3	NA
71501	AWRI1608	NA	NA	NA	3	3	NA
72501	AWRI1608	NA	NA	NA	3	3	NA
73501	AWRI1608	NA	NA	NA	3	3	NA
74501	AWRI1608	-0.18545	-0.18545	AHIQ01000006.1|3170	2.63812	3	NA
75501	AWRI1608	-0.188127	-0.188127	AHIQ01000006.1|4170	2.63323	3	NA
76501	AWRI1608	-0.184108	-0.184108	AHIQ01000006.1|5170	2.64058	3	3
77501	AWRI1608	-0.209725	-0.209725	AHIQ01000006.1|6170	2.59411	3	3
78501	AWRI1608	-0.0747041	-0.0747041	AHIQ01000006.1|7170	2.84861	3	3
79501	AWRI1608	0.00912214	0.00912214	AHIQ01000006.1|8170	3.01903	3	3
80501	AWRI1608	-0.0796284	-0.0796284	AHIQ01000006.1|9170	2.8389	3	3
81501	AWRI1608	0.0290477	0.0290477	AHIQ01000006.1|10170	3.06102	3	3
82501	AWRI1608	0.0255592	0.0255592	AHIQ01000006.1|11170	3.05362	3	3
83501	AWRI1608	-0.0128658	-0.0128658	AHIQ01000006.1|12170	2.97337	3	3
84501	AWRI1608	0.0221558	0.0221558	AHIQ01000006.1|13170	3.04643	3	3
85501	AWRI1608	0.147849	0.147849	AHIQ01000006.1|14170	3.32375	3	3
86501	AWRI1608	0.0918327	0.0918327	AHIQ01000006.1|15170	3.19717	3	3
87501	AWRI1608	0.099642	0.099642	AHIQ01000006.1|16170	3.21452	3	3
88501	AWRI1608	0.0983962	0.0983962	AHIQ01000006.1|17170	3.21175	3	3
89501	AWRI1608	-0.0327304	-0.0327304	AHIQ01000006.1|18170	2.93271	3	3
90501	AWRI1608	-0.161789	-0.161789	AHIQ01000006.1|19170	2.68175	3	3
91501	AWRI1608	-0.296216	-0.296216	AHIQ01000006.1|20170	2.44316	3	3
92501	AWRI1608	-0.412407	-0.412407	AHIQ01000006.1|21170	2.25411	3	NA
93501	AWRI1608	-0.726204	-0.726204	AHIQ01000006.1|22170	1.81348	3	NA
94501	AWRI1608	NA	NA	NA	3	3	NA
95501	AWRI1608	NA	NA	NA	3	3	NA
96501	AWRI1608	NA	NA	NA	3	3	NA
97501	AWRI1608	NA	NA	NA	3	3	NA
98501	AWRI1608	NA	NA	NA	3	3	NA
99501	AWRI1608	-0.165848	-0.165848	AHIQ01000007.1|3004	2.67421	3	NA
100501	AWRI1608	-0.146414	-0.146414	AHIQ01000007.1|4004	2.71048	3	NA
101501	AWRI1608	-0.132642	-0.132642	AHIQ01000007.1|5004	2.73648	3	3
102501	AWRI1608	-0.0988268	-0.0988268	AHIQ01000007.1|6004	2.80138	3	3
103501	AWRI1608	-0.126551	-0.126551	AHIQ01000007.1|7004	2.74806	3	3
104501	AWRI1608	-0.174199	-0.174199	AHIQ01000007.1|8004	2.65878	3	3
105501	AWRI1608	-0.108021	-0.108021	AHIQ01000007.1|9004	2.78358	3	3
106501	AWRI1608	-0.301256	-0.301256	AHIQ01000007.1|10004	2.43464	3	3
107501	AWRI1608	-0.269195	-0.269195	AHIQ01000007.1|11004	2.48935	3	NA
108501	AWRI1608	-0.167356	-0.167356	AHIQ01000007.1|12004	2.67142	3	NA
109501	AWRI1608	NA	NA	NA	3	3	NA
110501	AWRI1608	NA	NA	NA	3	3	NA
111501	AWRI1608	NA	NA	NA	3	3	NA
112501	AWRI1608	NA	NA	NA	3	3	NA
113501	AWRI1608	NA	NA	NA	3	3	NA
114501	AWRI1608	-0.329913	-0.329913	AHIQ01000008.1|2604	2.38675	3	NA
115501	AWRI1608	-0.273458	-0.273458	AHIQ01000008.1|3604	2.482	3	NA
116501	AWRI1608	-0.20527	-0.20527	AHIQ01000008.1|4604	2.60213	3	3
117501	AWRI1608	-0.166563	-0.166563	AHIQ01000008.1|5604	2.67289	3	3
118501	AWRI1608	-0.200802	-0.200802	AHIQ01000008.1|6604	2.6102	3	3
119501	AWRI1608	-0.245933	-0.245933	AHIQ01000008.1|7604	2.52981	3	3
120501	AWRI1608	-0.197049	-0.197049	AHIQ01000008.1|8604	2.617	3	3
121501	AWRI1608	-0.235171	-0.235171	AHIQ01000008.1|9604	2.54875	3	3
122501	AWRI1608	-0.235645	-0.235645	AHIQ01000008.1|10604	2.54792	3	3
123501	AWRI1608	-0.146519	-0.146519	AHIQ01000008.1|11604	2.71028	3	3
124501	AWRI1608	-0.0574355	-0.0574355	AHIQ01000008.1|12604	2.88291	3	3
125501	AWRI1608	-0.120166	-0.120166	AHIQ01000008.1|13604	2.76025	3	3
126501	AWRI1608	-0.105113	-0.105113	AHIQ01000008.1|14604	2.7892	3	3
127501	AWRI1608	-0.114479	-0.114479	AHIQ01000008.1|15604	2.77115	3	3
128501	AWRI1608	-0.134856	-0.134856	AHIQ01000008.1|16604	2.73228	3	3
129501	AWRI1608	-0.187813	-0.187813	AHIQ01000008.1|17604	2.63381	3	3
130501	AWRI1608	-0.115729	-0.115729	AHIQ01000008.1|18604	2.76875	3	3
131501	AWRI1608	-0.158847	-0.158847	AHIQ01000008.1|19604	2.68722	3	3
132501	AWRI1608	-0.20601	-0.20601	AHIQ01000008.1|20604	2.60079	3	3
133501	AWRI1608	-0.311683	-0.311683	AHIQ01000008.1|21604	2.4171	3	3
134501	AWRI1608	-0.24743	-0.24743	AHIQ01000008.1|22604	2.52719	3	3
135501	AWRI1608	-0.294878	-0.294878	AHIQ01000008.1|23604	2.44542	3	3
136501	AWRI1608	-0.335924	-0.335924	AHIQ01000008.1|24604	2.37683	3	3
137501	AWRI1608	-0.31293	-0.31293	AHIQ01000008.1|25604	2.41502	3	3
138501	AWRI1608	-0.190076	-0.190076	AHIQ01000008.1|26604	2.62968	3	3
139501	AWRI1608	-0.154995	-0.154995	AHIQ01000008.1|27604	2.69441	3	3
140501	AWRI1608	-0.141012	-0.141012	AHIQ01000008.1|28604	2.72065	3	3
141501	AWRI1608	-0.0667141	-0.0667141	AHIQ01000008.1|29604	2.86443	3	3
142501	AWRI1608	-0.0232993	-0.0232993	AHIQ01000008.1|30604	2.95194	3	3
143501	AWRI1608	-0.0716587	-0.0716587	AHIQ01000008.1|31604	2.85463	3	3
144501	AWRI1608	-0.0988317	-0.0988317	AHIQ01000008.1|32604	2.80137	3	3
145501	AWRI1608	-0.168189	-0.168189	AHIQ01000008.1|33604	2.66988	3	3
146501	AWRI1608	-0.202066	-0.202066	AHIQ01000008.1|34604	2.60791	3	3
147501	AWRI1608	-0.216882	-0.216882	AHIQ01000008.1|35604	2.58127	3	3
148501	AWRI1608	-0.253764	-0.253764	AHIQ01000008.1|36604	2.51612	3	3
149501	AWRI1608	-0.302371	-0.302371	AHIQ01000008.1|37604	2.43276	3	3
150501	AWRI1608	-0.249504	-0.249504	AHIQ01000008.1|38604	2.52356	3	3
151501	AWRI1608	-0.290977	-0.290977	AHIQ01000008.1|39604	2.45205	3	3
152501	AWRI1608	-0.429605	-0.429605	AHIQ01000008.1|40604	2.2274	3	2
153501	AWRI1608	-0.419425	-0.419425	AHIQ01000008.1|41604	2.24317	3	2
154501	AWRI1608	-0.424072	-0.424072	AHIQ01000008.1|42604	2.23595	3	2
155501	AWRI1608	-0.597351	-0.597351	AHIQ01000008.1|43604	1.9829	3	2
156501	AWRI1608	-0.645076	-0.645076	AHIQ01000008.1|44604	1.91838	3	2
157501	AWRI1608	-0.574169	-0.574169	AHIQ01000008.1|45604	2.01502	3	2
158501	AWRI1608	-0.521609	-0.521609	AHIQ01000008.1|46604	2.08978	3	2
159501	AWRI1608	-0.524515	-0.524515	AHIQ01000008.1|47604	2.08558	3	2
160501	AWRI1608	-0.371047	-0.371047	AHIQ01000008.1|48604	2.31966	3	2
161501	AWRI1608	-0.293048	-0.293048	AHIQ01000008.1|49604	2.44853	3	2
162501	AWRI1608	-0.323271	-0.323271	AHIQ01000008.1|50604	2.39777	3	2
163501	AWRI1608	-0.349178	-0.349178	AHIQ01000008.1|51604	2.35509	3	2
164501	AWRI1608	-0.312115	-0.312115	AHIQ01000008.1|52604	2.41638	3	2
165501	AWRI1608	-0.323254	-0.323254	AHIQ01000008.1|53604	2.39779	3	2
166501	AWRI1608	-0.324302	-0.324302	AHIQ01000008.1|54604	2.39605	3	2
167501	AWRI1608	-0.25177	-0.25177	AHIQ01000008.1|55604	2.5196	3	2
168501	AWRI1608	-0.206151	-0.206151	AHIQ01000008.1|56604	2.60054	3	2
169501	AWRI1608	-0.221273	-0.221273	AHIQ01000008.1|57604	2.57342	3	2
170501	AWRI1608	-0.262831	-0.262831	AHIQ01000008.1|58604	2.50035	3	2
171501	AWRI1608	-0.217619	-0.217619	AHIQ01000008.1|59604	2.57995	3	2
172501	AWRI1608	-0.210745	-0.210745	AHIQ01000008.1|60604	2.59227	3	2
173501	AWRI1608	-0.162391	-0.162391	AHIQ01000008.1|61604	2.68063	3	2
174501	AWRI1608	-0.146879	-0.146879	AHIQ01000008.1|62604	2.70961	3	2
175501	AWRI1608	-0.181177	-0.181177	AHIQ01000008.1|63604	2.64595	3	2
176501	AWRI1608	-0.264623	-0.264623	AHIQ01000008.1|64604	2.49725	3	2
177501	AWRI1608	-0.262229	-0.262229	AHIQ01000008.1|65604	2.5014	3	2
178501	AWRI1608	-0.402669	-0.402669	AHIQ01000008.1|66604	2.26937	3	2
179501	AWRI1608	-0.415359	-0.415359	AHIQ01000008.1|67604	2.2495	3	2
180501	AWRI1608	-0.408643	-0.408643	AHIQ01000008.1|68604	2.25999	3	2
181501	AWRI1608	-0.458743	-0.458743	AHIQ01000008.1|69604	2.18286	3	2
182501	AWRI1608	-0.585581	-0.585581	AHIQ01000008.1|70604	1.99914	3	2
183501	AWRI1608	-0.565502	-0.565502	AHIQ01000008.1|71604	2.02716	3	2
184501	AWRI1608	-0.559297	-0.559297	AHIQ01000008.1|72604	2.0359	3	2
185501	AWRI1608	-0.433326	-0.433326	AHIQ01000008.1|73604	2.22166	3	2
186501	AWRI1608	-0.377426	-0.377426	AHIQ01000008.1|74604	2.30943	3	NA
187501	AWRI1608	-0.315922	-0.315922	AHIQ01000008.1|75604	2.41001	3	NA
188501	AWRI1608	NA	NA	NA	3	3	NA
189501	AWRI1608	NA	NA	NA	3	3	NA
190501	AWRI1608	NA	NA	NA	3	3	NA
191501	AWRI1608	NA	NA	NA	3	3	NA
192501	AWRI1608	NA	NA	NA	3	3	NA
193501	AWRI1608	-0.42121	-0.42121	AHIQ01000009.1|2542	2.24039	3	NA
194501	AWRI1608	-0.227821	-0.227821	AHIQ01000009.1|3542	2.56177	3	NA
195501	AWRI1608	-0.0519343	-0.0519343	AHIQ01000009.1|4542	2.89393	3	3
196501	AWRI1608	-0.0962087	-0.0962087	AHIQ01000009.1|5542	2.80646	3	3
197501	AWRI1608	-0.191176	-0.191176	AHIQ01000009.1|6542	2.62768	3	3
198501	AWRI1608	-0.304476	-0.304476	AHIQ01000009.1|7542	2.42921	3	3
199501	AWRI1608	-0.243655	-0.243655	AHIQ01000009.1|8542	2.53381	3	3
200501	AWRI1608	-0.337038	-0.337038	AHIQ01000009.1|9542	2.375	3	3
201501	AWRI1608	-0.311234	-0.311234	AHIQ01000009.1|10542	2.41786	3	3
202501	AWRI1608	-0.233766	-0.233766	AHIQ01000009.1|11542	2.55124	3	NA
203501	AWRI1608	-0.27319	-0.27319	AHIQ01000009.1|12542	2.48246	3	NA
204501	AWRI1608	NA	NA	NA	3	3	NA
205501	AWRI1608	NA	NA	NA	3	3	NA
206501	AWRI1608	NA	NA	NA	3	3	NA
207501	AWRI1608	NA	NA	NA	3	3	NA
208501	AWRI1608	NA	NA	NA	3	3	NA
209501	AWRI1608	NA	NA	NA	3	3	NA
210501	AWRI1608	NA	NA	NA	3	3	NA
211501	AWRI1608	NA	NA	NA	3	3	NA
212501	AWRI1608	NA	NA	NA	3	3	NA
213501	AWRI1608	-0.672663	-0.672663	AHIQ01000011.1|3095	1.88204	3	NA
214501	AWRI1608	-0.653077	-0.653077	AHIQ01000011.1|4095	1.90777	3	NA
215501	AWRI1608	-0.410951	-0.410951	AHIQ01000011.1|5095	2.25638	3	2
216501	AWRI1608	-0.230398	-0.230398	AHIQ01000011.1|6095	2.5572	3	2
217501	AWRI1608	-0.0199705	-0.0199705	AHIQ01000011.1|7095	2.95876	3	3
218501	AWRI1608	0.0728344	0.0728344	AHIQ01000011.1|8095	3.15534	3	3
219501	AWRI1608	0.0755669	0.0755669	AHIQ01000011.1|9095	3.16133	3	3
220501	AWRI1608	-0.025641	-0.025641	AHIQ01000011.1|10095	2.94715	3	3
221501	AWRI1608	-0.101532	-0.101532	AHIQ01000011.1|11095	2.79613	3	3
222501	AWRI1608	-0.120466	-0.120466	AHIQ01000011.1|12095	2.75967	3	3
223501	AWRI1608	-0.20369	-0.20369	AHIQ01000011.1|13095	2.60498	3	3
224501	AWRI1608	-0.237792	-0.237792	AHIQ01000011.1|14095	2.54413	3	3
225501	AWRI1608	-0.204149	-0.204149	AHIQ01000011.1|15095	2.60415	3	3
226501	AWRI1608	-0.152469	-0.152469	AHIQ01000011.1|16095	2.69913	3	3
227501	AWRI1608	-0.237478	-0.237478	AHIQ01000011.1|17095	2.54468	3	3
228501	AWRI1608	-0.158933	-0.158933	AHIQ01000011.1|18095	2.68706	3	3
229501	AWRI1608	-0.132925	-0.132925	AHIQ01000011.1|19095	2.73594	3	3
230501	AWRI1608	-0.105249	-0.105249	AHIQ01000011.1|20095	2.78893	3	3
231501	AWRI1608	-0.119257	-0.119257	AHIQ01000011.1|21095	2.76199	3	3
232501	AWRI1608	-0.0632034	-0.0632034	AHIQ01000011.1|22095	2.87141	3	3
233501	AWRI1608	-0.0210349	-0.0210349	AHIQ01000011.1|23095	2.95658	3	3
234501	AWRI1608	-0.0452541	-0.0452541	AHIQ01000011.1|24095	2.90736	3	3
235501	AWRI1608	-0.0606255	-0.0606255	AHIQ01000011.1|25095	2.87654	3	3
236501	AWRI1608	-0.0555634	-0.0555634	AHIQ01000011.1|26095	2.88666	3	3
237501	AWRI1608	-0.0317591	-0.0317591	AHIQ01000011.1|27095	2.93468	3	3
238501	AWRI1608	-0.0468512	-0.0468512	AHIQ01000011.1|28095	2.90414	3	3
239501	AWRI1608	0.00958501	0.00958501	AHIQ01000011.1|29095	3.02	3	3
240501	AWRI1608	-0.04874	-0.04874	AHIQ01000011.1|30095	2.90034	3	3
241501	AWRI1608	-0.0887627	-0.0887627	AHIQ01000011.1|31095	2.82099	3	3
242501	AWRI1608	-0.170926	-0.170926	AHIQ01000011.1|32095	2.66482	3	3
243501	AWRI1608	-0.178584	-0.178584	AHIQ01000011.1|33095	2.65071	3	3
244501	AWRI1608	-0.194319	-0.194319	AHIQ01000011.1|34095	2.62196	3	3
245501	AWRI1608	-0.156985	-0.156985	AHIQ01000011.1|35095	2.69069	3	3
246501	AWRI1608	-0.0638604	-0.0638604	AHIQ01000011.1|36095	2.8701	3	3
247501	AWRI1608	0.0171317	0.0171317	AHIQ01000011.1|37095	3.03584	3	3
248501	AWRI1608	-0.0215077	-0.0215077	AHIQ01000011.1|38095	2.95561	3	3
249501	AWRI1608	-0.105099	-0.105099	AHIQ01000011.1|39095	2.78922	3	3
250501	AWRI1608	-0.126719	-0.126719	AHIQ01000011.1|40095	2.74774	3	3
251501	AWRI1608	-0.219218	-0.219218	AHIQ01000011.1|41095	2.57709	3	3
252501	AWRI1608	-0.307495	-0.307495	AHIQ01000011.1|42095	2.42413	3	3
253501	AWRI1608	-0.261204	-0.261204	AHIQ01000011.1|43095	2.50317	3	3
254501	AWRI1608	-0.272715	-0.272715	AHIQ01000011.1|44095	2.48328	3	3
255501	AWRI1608	-0.184519	-0.184519	AHIQ01000011.1|45095	2.63983	3	3
256501	AWRI1608	0.00893335	0.00893335	AHIQ01000011.1|46095	3.01863	3	3
257501	AWRI1608	0.117876	0.117876	AHIQ01000011.1|47095	3.25541	3	3
258501	AWRI1608	0.101928	0.101928	AHIQ01000011.1|48095	3.21962	3	3
259501	AWRI1608	0.0992536	0.0992536	AHIQ01000011.1|49095	3.21366	3	3
260501	AWRI1608	0.0772142	0.0772142	AHIQ01000011.1|50095	3.16494	3	3
261501	AWRI1608	-0.0706893	-0.0706893	AHIQ01000011.1|51095	2.85655	3	3
262501	AWRI1608	-0.128542	-0.128542	AHIQ01000011.1|52095	2.74427	3	3
263501	AWRI1608	-0.0657291	-0.0657291	AHIQ01000011.1|53095	2.86639	3	3
264501	AWRI1608	0.0134439	0.0134439	AHIQ01000011.1|54095	3.02809	3	3
265501	AWRI1608	0.00614815	0.00614815	AHIQ01000011.1|55095	3.01281	3	3
266501	AWRI1608	-0.0211359	-0.0211359	AHIQ01000011.1|56095	2.95637	3	3
267501	AWRI1608	0.0256659	0.0256659	AHIQ01000011.1|57095	3.05385	3	3
268501	AWRI1608	0.00482792	0.00482792	AHIQ01000011.1|58095	3.01006	3	3
269501	AWRI1608	-0.00692708	-0.00692708	AHIQ01000011.1|59095	2.98563	3	3
270501	AWRI1608	-0.013756	-0.013756	AHIQ01000011.1|60095	2.97153	3	3
271501	AWRI1608	0.0174043	0.0174043	AHIQ01000011.1|61095	3.03641	3	3
272501	AWRI1608	-0.0587304	-0.0587304	AHIQ01000011.1|62095	2.88033	3	3
273501	AWRI1608	-0.0291767	-0.0291767	AHIQ01000011.1|63095	2.93994	3	3
274501	AWRI1608	0.0730365	0.0730365	AHIQ01000011.1|64095	3.15579	3	3
275501	AWRI1608	0.108727	0.108727	AHIQ01000011.1|65095	3.23483	3	3
276501	AWRI1608	0.0908902	0.0908902	AHIQ01000011.1|66095	3.19508	3	3
277501	AWRI1608	0.147747	0.147747	AHIQ01000011.1|67095	3.32351	3	3
278501	AWRI1608	0.131116	0.131116	AHIQ01000011.1|68095	3.28542	3	3
279501	AWRI1608	0.0205425	0.0205425	AHIQ01000011.1|69095	3.04302	3	3
280501	AWRI1608	0.00148815	0.00148815	AHIQ01000011.1|70095	3.0031	3	3
281501	AWRI1608	0.075451	0.075451	AHIQ01000011.1|71095	3.16107	3	3
282501	AWRI1608	0.00891537	0.00891537	AHIQ01000011.1|72095	3.0186	3	3
283501	AWRI1608	-0.058754	-0.058754	AHIQ01000011.1|73095	2.88028	3	3
284501	AWRI1608	-0.0159495	-0.0159495	AHIQ01000011.1|74095	2.96702	3	3
285501	AWRI1608	-0.0455015	-0.0455015	AHIQ01000011.1|75095	2.90686	3	3
286501	AWRI1608	-0.133183	-0.133183	AHIQ01000011.1|76095	2.73545	3	3
287501	AWRI1608	-0.166081	-0.166081	AHIQ01000011.1|77095	2.67378	3	3
288501	AWRI1608	-0.213716	-0.213716	AHIQ01000011.1|78095	2.58694	3	3
289501	AWRI1608	-0.22626	-0.22626	AHIQ01000011.1|79095	2.56455	3	3
290501	AWRI1608	-0.227991	-0.227991	AHIQ01000011.1|80095	2.56147	3	3
291501	AWRI1608	-0.2637	-0.2637	AHIQ01000011.1|81095	2.49885	3	3
292501	AWRI1608	-0.254007	-0.254007	AHIQ01000011.1|82095	2.51569	3	3
293501	AWRI1608	-0.188302	-0.188302	AHIQ01000011.1|83095	2.63291	3	3
294501	AWRI1608	-0.274853	-0.274853	AHIQ01000011.1|84095	2.4796	3	NA
295501	AWRI1608	-0.295344	-0.295344	AHIQ01000011.1|85095	2.44463	3	NA
296501	AWRI1608	NA	NA	NA	3	3	NA
297501	AWRI1608	NA	NA	NA	3	3	NA
298501	AWRI1608	NA	NA	NA	3	3	NA
299501	AWRI1608	NA	NA	NA	3	3	NA
300501	AWRI1608	NA	NA	NA	3	3	NA
301501	AWRI1608	-0.703266	-0.703266	AHIQ01000012.1|2988	1.84254	3	NA
302501	AWRI1608	-0.618313	-0.618313	AHIQ01000012.1|3988	1.9543	3	NA
303501	AWRI1608	-0.817976	-0.817976	AHIQ01000012.1|4988	1.70171	3	2
304501	AWRI1608	-0.90434	-0.90434	AHIQ01000012.1|5988	1.60283	3	2
305501	AWRI1608	-0.648823	-0.648823	AHIQ01000012.1|6988	1.9134	3	2
306501	AWRI1608	-0.651577	-0.651577	AHIQ01000012.1|7988	1.90975	3	2
307501	AWRI1608	-0.551844	-0.551844	AHIQ01000012.1|8988	2.04644	3	2
308501	AWRI1608	-0.493637	-0.493637	AHIQ01000012.1|9988	2.1307	3	2
309501	AWRI1608	-0.260683	-0.260683	AHIQ01000012.1|10988	2.50408	3	2
310501	AWRI1608	-0.245381	-0.245381	AHIQ01000012.1|11988	2.53078	3	2
311501	AWRI1608	-0.0794802	-0.0794802	AHIQ01000012.1|12988	2.8392	3	3
312501	AWRI1608	-0.00832758	-0.00832758	AHIQ01000012.1|13988	2.98273	3	3
313501	AWRI1608	0.130947	0.130947	AHIQ01000012.1|14988	3.28504	3	3
314501	AWRI1608	0.0574214	0.0574214	AHIQ01000012.1|15988	3.12181	3	3
315501	AWRI1608	0.0719354	0.0719354	AHIQ01000012.1|16988	3.15338	3	3
316501	AWRI1608	0.0914634	0.0914634	AHIQ01000012.1|17988	3.19635	3	3
317501	AWRI1608	0.146415	0.146415	AHIQ01000012.1|18988	3.32045	3	3
318501	AWRI1608	0.107552	0.107552	AHIQ01000012.1|19988	3.2322	3	3
319501	AWRI1608	0.114692	0.114692	AHIQ01000012.1|20988	3.24823	3	3
320501	AWRI1608	0.173218	0.173218	AHIQ01000012.1|21988	3.38271	3	3
321501	AWRI1608	0.25249	0.25249	AHIQ01000012.1|22988	3.57379	3	3
322501	AWRI1608	0.155597	0.155597	AHIQ01000012.1|23988	3.34165	3	3
323501	AWRI1608	0.200831	0.200831	AHIQ01000012.1|24988	3.44808	3	3
324501	AWRI1608	0.219	0.219	AHIQ01000012.1|25988	3.49178	3	3
325501	AWRI1608	0.171592	0.171592	AHIQ01000012.1|26988	3.3789	3	3
326501	AWRI1608	0.0733074	0.0733074	AHIQ01000012.1|27988	3.15638	3	3
327501	AWRI1608	0.20275	0.20275	AHIQ01000012.1|28988	3.45267	3	3
328501	AWRI1608	0.0806443	0.0806443	AHIQ01000012.1|29988	3.17247	3	3
329501	AWRI1608	0.115473	0.115473	AHIQ01000012.1|30988	3.24999	3	3
330501	AWRI1608	0.13893	0.13893	AHIQ01000012.1|31988	3.30326	3	3
331501	AWRI1608	0.156758	0.156758	AHIQ01000012.1|32988	3.34434	3	3
332501	AWRI1608	0.134898	0.134898	AHIQ01000012.1|33988	3.29405	3	3
333501	AWRI1608	0.174818	0.174818	AHIQ01000012.1|34988	3.38646	3	3
334501	AWRI1608	0.148584	0.148584	AHIQ01000012.1|35988	3.32544	3	3
335501	AWRI1608	0.152976	0.152976	AHIQ01000012.1|36988	3.33558	3	3
336501	AWRI1608	0.0848896	0.0848896	AHIQ01000012.1|37988	3.18182	3	3
337501	AWRI1608	0.0425008	0.0425008	AHIQ01000012.1|38988	3.08969	3	3
338501	AWRI1608	0.0988229	0.0988229	AHIQ01000012.1|39988	3.2127	3	3
339501	AWRI1608	0.104059	0.104059	AHIQ01000012.1|40988	3.22438	3	3
340501	AWRI1608	0.121398	0.121398	AHIQ01000012.1|41988	3.26337	3	3
341501	AWRI1608	0.187031	0.187031	AHIQ01000012.1|42988	3.41526	3	3
342501	AWRI1608	0.161999	0.161999	AHIQ01000012.1|43988	3.35651	3	3
343501	AWRI1608	0.146521	0.146521	AHIQ01000012.1|44988	3.32069	3	3
344501	AWRI1608	0.105241	0.105241	AHIQ01000012.1|45988	3.22702	3	3
345501	AWRI1608	0.0264344	0.0264344	AHIQ01000012.1|46988	3.05548	3	3
346501	AWRI1608	-0.0296614	-0.0296614	AHIQ01000012.1|47988	2.93895	3	3
347501	AWRI1608	-0.08328	-0.08328	AHIQ01000012.1|48988	2.83173	3	3
348501	AWRI1608	-0.106671	-0.106671	AHIQ01000012.1|49988	2.78619	3	3
349501	AWRI1608	-0.0719392	-0.0719392	AHIQ01000012.1|50988	2.85408	3	3
350501	AWRI1608	0.0108381	0.0108381	AHIQ01000012.1|51988	3.02262	3	3
351501	AWRI1608	0.0343045	0.0343045	AHIQ01000012.1|52988	3.07219	3	3
352501	AWRI1608	0.122903	0.122903	AHIQ01000012.1|53988	3.26677	3	3
353501	AWRI1608	0.214075	0.214075	AHIQ01000012.1|54988	3.47988	3	3
354501	AWRI1608	0.222295	0.222295	AHIQ01000012.1|55988	3.49976	3	3
355501	AWRI1608	0.216685	0.216685	AHIQ01000012.1|56988	3.48618	3	3
356501	AWRI1608	0.201846	0.201846	AHIQ01000012.1|57988	3.45051	3	NA
357501	AWRI1608	0.20037	0.20037	AHIQ01000012.1|58988	3.44698	3	NA
358501	AWRI1608	NA	NA	NA	3	3	NA
359501	AWRI1608	NA	NA	NA	3	3	NA
360501	AWRI1608	NA	NA	NA	3	3	NA
361501	AWRI1608	NA	NA	NA	3	3	NA
362501	AWRI1608	NA	NA	NA	3	3	NA
363501	AWRI1608	0.290849	0.290849	AHIQ01000013.1|3221	3.67008	3	NA
364501	AWRI1608	0.20841	0.20841	AHIQ01000013.1|4221	3.46624	3	NA
365501	AWRI1608	0.209936	0.209936	AHIQ01000013.1|5221	3.46991	3	3
366501	AWRI1608	0.161663	0.161663	AHIQ01000013.1|6221	3.35573	3	3
367501	AWRI1608	0.216549	0.216549	AHIQ01000013.1|7221	3.48585	3	3
368501	AWRI1608	0.138786	0.138786	AHIQ01000013.1|8221	3.30293	3	3
369501	AWRI1608	0.176083	0.176083	AHIQ01000013.1|9221	3.38944	3	3
370501	AWRI1608	0.28698	0.28698	AHIQ01000013.1|10221	3.66025	3	3
371501	AWRI1608	0.341164	0.341164	AHIQ01000013.1|11221	3.80034	3	4
372501	AWRI1608	0.317205	0.317205	AHIQ01000013.1|12221	3.73774	3	4
373501	AWRI1608	0.399408	0.399408	AHIQ01000013.1|13221	3.9569	3	4
374501	AWRI1608	0.467205	0.467205	AHIQ01000013.1|14221	4.14729	3	4
375501	AWRI1608	0.388562	0.388562	AHIQ01000013.1|15221	3.92726	3	4
376501	AWRI1608	0.330402	0.330402	AHIQ01000013.1|16221	3.77209	3	4
377501	AWRI1608	0.317898	0.317898	AHIQ01000013.1|17221	3.73954	3	4
378501	AWRI1608	0.281397	0.281397	AHIQ01000013.1|18221	3.64611	3	4
379501	AWRI1608	0.176187	0.176187	AHIQ01000013.1|19221	3.38968	3	4
380501	AWRI1608	0.174008	0.174008	AHIQ01000013.1|20221	3.38456	3	4
381501	AWRI1608	0.158206	0.158206	AHIQ01000013.1|21221	3.3477	3	3
382501	AWRI1608	0.0988651	0.0988651	AHIQ01000013.1|22221	3.21279	3	3
383501	AWRI1608	0.053831	0.053831	AHIQ01000013.1|23221	3.11405	3	3
384501	AWRI1608	0.0789966	0.0789966	AHIQ01000013.1|24221	3.16885	3	3
385501	AWRI1608	0.172054	0.172054	AHIQ01000013.1|25221	3.37998	3	3
386501	AWRI1608	0.211999	0.211999	AHIQ01000013.1|26221	3.47488	3	3
387501	AWRI1608	0.279498	0.279498	AHIQ01000013.1|27221	3.64132	3	3
388501	AWRI1608	0.348753	0.348753	AHIQ01000013.1|28221	3.82038	3	4
389501	AWRI1608	0.352464	0.352464	AHIQ01000013.1|29221	3.83022	3	4
390501	AWRI1608	0.242393	0.242393	AHIQ01000013.1|30221	3.54886	3	4
391501	AWRI1608	0.23599	0.23599	AHIQ01000013.1|31221	3.53314	3	4
392501	AWRI1608	0.185099	0.185099	AHIQ01000013.1|32221	3.41068	3	4
393501	AWRI1608	0.152341	0.152341	AHIQ01000013.1|33221	3.33411	3	4
394501	AWRI1608	0.131578	0.131578	AHIQ01000013.1|34221	3.28647	3	4
395501	AWRI1608	0.211753	0.211753	AHIQ01000013.1|35221	3.47428	3	4
396501	AWRI1608	0.171303	0.171303	AHIQ01000013.1|36221	3.37823	3	4
397501	AWRI1608	0.220701	0.220701	AHIQ01000013.1|37221	3.4959	3	4
398501	AWRI1608	0.230954	0.230954	AHIQ01000013.1|38221	3.52083	3	4
399501	AWRI1608	0.249571	0.249571	AHIQ01000013.1|39221	3.56656	3	4
400501	AWRI1608	0.233176	0.233176	AHIQ01000013.1|40221	3.52626	3	4
401501	AWRI1608	0.291673	0.291673	AHIQ01000013.1|41221	3.67218	3	4
402501	AWRI1608	0.257017	0.257017	AHIQ01000013.1|42221	3.58502	3	4
403501	AWRI1608	0.265275	0.265275	AHIQ01000013.1|43221	3.60559	3	4
404501	AWRI1608	0.276469	0.276469	AHIQ01000013.1|44221	3.63368	3	4
405501	AWRI1608	0.236101	0.236101	AHIQ01000013.1|45221	3.53342	3	4
406501	AWRI1608	0.21317	0.21317	AHIQ01000013.1|46221	3.4777	3	4
407501	AWRI1608	0.234415	0.234415	AHIQ01000013.1|47221	3.52929	3	4
408501	AWRI1608	0.190844	0.190844	AHIQ01000013.1|48221	3.42429	3	4
409501	AWRI1608	0.182945	0.182945	AHIQ01000013.1|49221	3.4056	3	4
410501	AWRI1608	0.188202	0.188202	AHIQ01000013.1|50221	3.41803	3	4
411501	AWRI1608	0.135244	0.135244	AHIQ01000013.1|51221	3.29484	3	4
412501	AWRI1608	0.184581	0.184581	AHIQ01000013.1|52221	3.40946	3	4
413501	AWRI1608	0.204337	0.204337	AHIQ01000013.1|53221	3.45647	3	4
414501	AWRI1608	0.220433	0.220433	AHIQ01000013.1|54221	3.49525	3	4
415501	AWRI1608	0.22624	0.22624	AHIQ01000013.1|55221	3.50935	3	4
416501	AWRI1608	0.283799	0.283799	AHIQ01000013.1|56221	3.65219	3	4
417501	AWRI1608	0.285362	0.285362	AHIQ01000013.1|57221	3.65615	3	4
418501	AWRI1608	0.320689	0.320689	AHIQ01000013.1|58221	3.74678	3	4
419501	AWRI1608	0.302951	0.302951	AHIQ01000013.1|59221	3.70099	3	4
420501	AWRI1608	0.312288	0.312288	AHIQ01000013.1|60221	3.72503	3	4
421501	AWRI1608	0.332534	0.332534	AHIQ01000013.1|61221	3.77767	3	4
422501	AWRI1608	0.334077	0.334077	AHIQ01000013.1|62221	3.78171	3	4
423501	AWRI1608	0.242363	0.242363	AHIQ01000013.1|63221	3.54879	3	4
424501	AWRI1608	0.170363	0.170363	AHIQ01000013.1|64221	3.37602	3	4
425501	AWRI1608	0.193073	0.193073	AHIQ01000013.1|65221	3.42959	3	4
426501	AWRI1608	0.181597	0.181597	AHIQ01000013.1|66221	3.40242	3	4
427501	AWRI1608	0.13798	0.13798	AHIQ01000013.1|67221	3.30109	3	4
428501	AWRI1608	0.224945	0.224945	AHIQ01000013.1|68221	3.5062	3	NA
429501	AWRI1608	0.250659	0.250659	AHIQ01000013.1|69221	3.56925	3	NA
430501	AWRI1608	NA	NA	NA	3	3	NA
431501	AWRI1608	NA	NA	NA	3	3	NA
432501	AWRI1608	NA	NA	NA	3	3	NA
433501	AWRI1608	NA	NA	NA	3	3	NA
434501	AWRI1608	NA	NA	NA	3	3	NA
435501	AWRI1608	-0.17546	-0.17546	AHIQ01000014.1|2516	2.65646	3	NA
436501	AWRI1608	0.0917309	0.0917309	AHIQ01000014.1|3516	3.19694	3	NA
437501	AWRI1608	0.0727785	0.0727785	AHIQ01000014.1|4516	3.15522	3	3
438501	AWRI1608	0.0428521	0.0428521	AHIQ01000014.1|5516	3.09045	3	3
439501	AWRI1608	-0.0899417	-0.0899417	AHIQ01000014.1|6516	2.81868	3	3
440501	AWRI1608	0.00263086	0.00263086	AHIQ01000014.1|7516	3.00548	3	3
441501	AWRI1608	-0.0359636	-0.0359636	AHIQ01000014.1|8516	2.92614	3	3
442501	AWRI1608	0.0412838	0.0412838	AHIQ01000014.1|9516	3.08709	3	3
443501	AWRI1608	0.0118074	0.0118074	AHIQ01000014.1|10516	3.02465	3	3
444501	AWRI1608	0.0394101	0.0394101	AHIQ01000014.1|11516	3.08308	3	3
445501	AWRI1608	-0.0113743	-0.0113743	AHIQ01000014.1|12516	2.97644	3	3
446501	AWRI1608	0.0797372	0.0797372	AHIQ01000014.1|13516	3.17048	3	3
447501	AWRI1608	0.121901	0.121901	AHIQ01000014.1|14516	3.2645	3	3
448501	AWRI1608	0.200217	0.200217	AHIQ01000014.1|15516	3.44661	3	3
449501	AWRI1608	0.276439	0.276439	AHIQ01000014.1|16516	3.6336	3	3
450501	AWRI1608	0.346966	0.346966	AHIQ01000014.1|17516	3.81565	3	4
451501	AWRI1608	0.357369	0.357369	AHIQ01000014.1|18516	3.84326	3	4
452501	AWRI1608	0.284315	0.284315	AHIQ01000014.1|19516	3.6535	3	4
453501	AWRI1608	0.247755	0.247755	AHIQ01000014.1|20516	3.56208	3	4
454501	AWRI1608	0.247626	0.247626	AHIQ01000014.1|21516	3.56176	3	4
455501	AWRI1608	0.26194	0.26194	AHIQ01000014.1|22516	3.59727	3	4
456501	AWRI1608	0.14161	0.14161	AHIQ01000014.1|23516	3.30941	3	4
457501	AWRI1608	0.113719	0.113719	AHIQ01000014.1|24516	3.24604	3	3
458501	AWRI1608	0.112606	0.112606	AHIQ01000014.1|25516	3.24354	3	3
459501	AWRI1608	0.0207164	0.0207164	AHIQ01000014.1|26516	3.04339	3	3
460501	AWRI1608	0.0334474	0.0334474	AHIQ01000014.1|27516	3.07036	3	3
461501	AWRI1608	0.130434	0.130434	AHIQ01000014.1|28516	3.28387	3	3
462501	AWRI1608	0.14829	0.14829	AHIQ01000014.1|29516	3.32476	3	3
463501	AWRI1608	0.161602	0.161602	AHIQ01000014.1|30516	3.35559	3	3
464501	AWRI1608	0.242087	0.242087	AHIQ01000014.1|31516	3.54811	3	3
465501	AWRI1608	0.224697	0.224697	AHIQ01000014.1|32516	3.5056	3	3
466501	AWRI1608	0.221453	0.221453	AHIQ01000014.1|33516	3.49772	3	3
467501	AWRI1608	0.208574	0.208574	AHIQ01000014.1|34516	3.46664	3	3
468501	AWRI1608	0.187341	0.187341	AHIQ01000014.1|35516	3.41599	3	3
469501	AWRI1608	0.14973	0.14973	AHIQ01000014.1|36516	3.32808	3	3
470501	AWRI1608	0.0994732	0.0994732	AHIQ01000014.1|37516	3.21415	3	3
471501	AWRI1608	0.0708506	0.0708506	AHIQ01000014.1|38516	3.15101	3	3
472501	AWRI1608	0.0635025	0.0635025	AHIQ01000014.1|39516	3.135	3	3
473501	AWRI1608	0.091162	0.091162	AHIQ01000014.1|40516	3.19568	3	3
474501	AWRI1608	0.12601	0.12601	AHIQ01000014.1|41516	3.27382	3	3
475501	AWRI1608	0.131884	0.131884	AHIQ01000014.1|42516	3.28717	3	3
476501	AWRI1608	0.190523	0.190523	AHIQ01000014.1|43516	3.42353	3	3
477501	AWRI1608	0.252445	0.252445	AHIQ01000014.1|44516	3.57367	3	3
478501	AWRI1608	0.241793	0.241793	AHIQ01000014.1|45516	3.54738	3	3
479501	AWRI1608	0.211773	0.211773	AHIQ01000014.1|46516	3.47433	3	3
480501	AWRI1608	0.205565	0.205565	AHIQ01000014.1|47516	3.45941	3	3
481501	AWRI1608	0.11531	0.11531	AHIQ01000014.1|48516	3.24962	3	3
482501	AWRI1608	0.0593022	0.0593022	AHIQ01000014.1|49516	3.12589	3	3
483501	AWRI1608	0.0686742	0.0686742	AHIQ01000014.1|50516	3.14626	3	3
484501	AWRI1608	0.0822773	0.0822773	AHIQ01000014.1|51516	3.17606	3	3
485501	AWRI1608	0.050402	0.050402	AHIQ01000014.1|52516	3.10666	3	3
486501	AWRI1608	-0.00122546	-0.00122546	AHIQ01000014.1|53516	2.99745	3	3
487501	AWRI1608	-0.029029	-0.029029	AHIQ01000014.1|54516	2.94024	3	3
488501	AWRI1608	-0.0782191	-0.0782191	AHIQ01000014.1|55516	2.84168	3	3
489501	AWRI1608	-0.145858	-0.145858	AHIQ01000014.1|56516	2.71153	3	3
490501	AWRI1608	-0.114729	-0.114729	AHIQ01000014.1|57516	2.77067	3	3
491501	AWRI1608	-0.0371373	-0.0371373	AHIQ01000014.1|58516	2.92376	3	3
492501	AWRI1608	-0.0220358	-0.0220358	AHIQ01000014.1|59516	2.95453	3	3
493501	AWRI1608	-0.0871955	-0.0871955	AHIQ01000014.1|60516	2.82405	3	3
494501	AWRI1608	-0.0793273	-0.0793273	AHIQ01000014.1|61516	2.8395	3	3
495501	AWRI1608	-0.123774	-0.123774	AHIQ01000014.1|62516	2.75335	3	3
496501	AWRI1608	-0.173964	-0.173964	AHIQ01000014.1|63516	2.65921	3	3
497501	AWRI1608	-0.141276	-0.141276	AHIQ01000014.1|64516	2.72015	3	3
498501	AWRI1608	0.00996238	0.00996238	AHIQ01000014.1|65516	3.02079	3	3
499501	AWRI1608	0.060296	0.060296	AHIQ01000014.1|66516	3.12804	3	3
500501	AWRI1608	0.0982526	0.0982526	AHIQ01000014.1|67516	3.21143	3	3
501501	AWRI1608	0.131781	0.131781	AHIQ01000014.1|68516	3.28694	3	3
502501	AWRI1608	0.134795	0.134795	AHIQ01000014.1|69516	3.29381	3	3
503501	AWRI1608	0.0845142	0.0845142	AHIQ01000014.1|70516	3.18099	3	3
504501	AWRI1608	0.0196281	0.0196281	AHIQ01000014.1|71516	3.04109	3	3
505501	AWRI1608	-0.0156614	-0.0156614	AHIQ01000014.1|72516	2.96761	3	3
506501	AWRI1608	-0.0403664	-0.0403664	AHIQ01000014.1|73516	2.91722	3	3
507501	AWRI1608	-0.0462065	-0.0462065	AHIQ01000014.1|74516	2.90544	3	3
508501	AWRI1608	-0.0551592	-0.0551592	AHIQ01000014.1|75516	2.88746	3	3
509501	AWRI1608	-0.0470147	-0.0470147	AHIQ01000014.1|76516	2.90381	3	3
510501	AWRI1608	-0.00379906	-0.00379906	AHIQ01000014.1|77516	2.99211	3	3
511501	AWRI1608	0.00691361	0.00691361	AHIQ01000014.1|78516	3.01441	3	3
512501	AWRI1608	-0.0867823	-0.0867823	AHIQ01000014.1|79516	2.82486	3	3
513501	AWRI1608	-0.148362	-0.148362	AHIQ01000014.1|80516	2.70682	3	3
514501	AWRI1608	-0.205953	-0.205953	AHIQ01000014.1|81516	2.6009	3	3
515501	AWRI1608	-0.187807	-0.187807	AHIQ01000014.1|82516	2.63382	3	3
516501	AWRI1608	-0.153414	-0.153414	AHIQ01000014.1|83516	2.69736	3	3
517501	AWRI1608	-0.046711	-0.046711	AHIQ01000014.1|84516	2.90442	3	3
518501	AWRI1608	0.0640175	0.0640175	AHIQ01000014.1|85516	3.13612	3	3
519501	AWRI1608	0.188175	0.188175	AHIQ01000014.1|86516	3.41796	3	3
520501	AWRI1608	0.212659	0.212659	AHIQ01000014.1|87516	3.47647	3	3
521501	AWRI1608	0.239224	0.239224	AHIQ01000014.1|88516	3.54107	3	3
522501	AWRI1608	0.195836	0.195836	AHIQ01000014.1|89516	3.43616	3	3
523501	AWRI1608	0.0666371	0.0666371	AHIQ01000014.1|90516	3.14182	3	3
524501	AWRI1608	0.0665939	0.0665939	AHIQ01000014.1|91516	3.14172	3	3
525501	AWRI1608	0.0560168	0.0560168	AHIQ01000014.1|92516	3.11877	3	3
526501	AWRI1608	-0.0163383	-0.0163383	AHIQ01000014.1|93516	2.96622	3	3
527501	AWRI1608	0.0102992	0.0102992	AHIQ01000014.1|94516	3.02149	3	3
528501	AWRI1608	0.0854908	0.0854908	AHIQ01000014.1|95516	3.18315	3	3
529501	AWRI1608	-0.00516929	-0.00516929	AHIQ01000014.1|96516	2.98927	3	3
530501	AWRI1608	-0.0156523	-0.0156523	AHIQ01000014.1|97516	2.96763	3	3
531501	AWRI1608	-0.0132583	-0.0132583	AHIQ01000014.1|98516	2.97256	3	3
532501	AWRI1608	0.0128837	0.0128837	AHIQ01000014.1|99516	3.02691	3	3
533501	AWRI1608	0.0408266	0.0408266	AHIQ01000014.1|100516	3.08611	3	3
534501	AWRI1608	0.0298942	0.0298942	AHIQ01000014.1|101516	3.06281	3	3
535501	AWRI1608	-0.168484	-0.168484	AHIQ01000014.1|102516	2.66933	3	3
536501	AWRI1608	-0.25709	-0.25709	AHIQ01000014.1|103516	2.51032	3	3
537501	AWRI1608	-0.217208	-0.217208	AHIQ01000014.1|104516	2.58069	3	3
538501	AWRI1608	-0.172337	-0.172337	AHIQ01000014.1|105516	2.66221	3	3
539501	AWRI1608	-0.127139	-0.127139	AHIQ01000014.1|106516	2.74694	3	3
540501	AWRI1608	0.0123456	0.0123456	AHIQ01000014.1|107516	3.02578	3	3
541501	AWRI1608	0.0943643	0.0943643	AHIQ01000014.1|108516	3.20278	3	3
542501	AWRI1608	0.0143578	0.0143578	AHIQ01000014.1|109516	3.03001	3	3
543501	AWRI1608	-0.0822932	-0.0822932	AHIQ01000014.1|110516	2.83367	3	3
544501	AWRI1608	-0.0848334	-0.0848334	AHIQ01000014.1|111516	2.82868	3	3
545501	AWRI1608	-0.135377	-0.135377	AHIQ01000014.1|112516	2.7313	3	3
546501	AWRI1608	-0.107099	-0.107099	AHIQ01000014.1|113516	2.78536	3	NA
547501	AWRI1608	-0.121262	-0.121262	AHIQ01000014.1|114516	2.75815	3	NA
548501	AWRI1608	NA	NA	NA	3	3	NA
549501	AWRI1608	NA	NA	NA	3	3	NA
550501	AWRI1608	NA	NA	NA	3	3	NA
551501	AWRI1608	NA	NA	NA	3	3	NA
552501	AWRI1608	NA	NA	NA	3	3	NA
553501	AWRI1608	-0.50881	-0.50881	AHIQ01000015.1|3198	2.10841	3	NA
554501	AWRI1608	-0.351635	-0.351635	AHIQ01000015.1|4198	2.35109	3	NA
555501	AWRI1608	-0.253316	-0.253316	AHIQ01000015.1|5198	2.5169	3	3
556501	AWRI1608	-0.148523	-0.148523	AHIQ01000015.1|6198	2.70652	3	3
557501	AWRI1608	0.0164745	0.0164745	AHIQ01000015.1|7198	3.03445	3	3
558501	AWRI1608	0.219136	0.219136	AHIQ01000015.1|8198	3.49211	3	3
559501	AWRI1608	0.244766	0.244766	AHIQ01000015.1|9198	3.5547	3	3
560501	AWRI1608	0.212714	0.212714	AHIQ01000015.1|10198	3.4766	3	3
561501	AWRI1608	0.162152	0.162152	AHIQ01000015.1|11198	3.35687	3	3
562501	AWRI1608	0.031351	0.031351	AHIQ01000015.1|12198	3.06591	3	3
563501	AWRI1608	-0.117901	-0.117901	AHIQ01000015.1|13198	2.76458	3	3
564501	AWRI1608	-0.279375	-0.279375	AHIQ01000015.1|14198	2.47184	3	3
565501	AWRI1608	-0.305884	-0.305884	AHIQ01000015.1|15198	2.42684	3	3
566501	AWRI1608	-0.447708	-0.447708	AHIQ01000015.1|16198	2.19962	3	2
567501	AWRI1608	-0.511631	-0.511631	AHIQ01000015.1|17198	2.10429	3	2
568501	AWRI1608	-0.568289	-0.568289	AHIQ01000015.1|18198	2.02325	3	2
569501	AWRI1608	-0.568517	-0.568517	AHIQ01000015.1|19198	2.02293	3	2
570501	AWRI1608	-0.509376	-0.509376	AHIQ01000015.1|20198	2.10758	3	2
571501	AWRI1608	-0.453246	-0.453246	AHIQ01000015.1|21198	2.19119	3	2
572501	AWRI1608	-0.331307	-0.331307	AHIQ01000015.1|22198	2.38445	3	2
573501	AWRI1608	-0.216546	-0.216546	AHIQ01000015.1|23198	2.58187	3	NA
574501	AWRI1608	-0.260564	-0.260564	AHIQ01000015.1|24198	2.50428	3	NA
575501	AWRI1608	NA	NA	NA	3	3	NA
576501	AWRI1608	NA	NA	NA	3	3	NA
577501	AWRI1608	NA	NA	NA	3	3	NA
578501	AWRI1608	NA	NA	NA	3	3	NA
579501	AWRI1608	NA	NA	NA	3	3	NA
580501	AWRI1608	-0.468968	-0.468968	AHIQ01000016.1|3417	2.16744	3	NA
581501	AWRI1608	-0.326665	-0.326665	AHIQ01000016.1|4417	2.39213	3	NA
582501	AWRI1608	-0.21008	-0.21008	AHIQ01000016.1|5417	2.59347	3	3
583501	AWRI1608	-0.170004	-0.170004	AHIQ01000016.1|6417	2.66652	3	3
584501	AWRI1608	-0.192167	-0.192167	AHIQ01000016.1|7417	2.62587	3	3
585501	AWRI1608	-0.203342	-0.203342	AHIQ01000016.1|8417	2.60561	3	3
586501	AWRI1608	-0.148337	-0.148337	AHIQ01000016.1|9417	2.70687	3	3
587501	AWRI1608	-0.105994	-0.105994	AHIQ01000016.1|10417	2.78749	3	3
588501	AWRI1608	-0.0656013	-0.0656013	AHIQ01000016.1|11417	2.86664	3	3
589501	AWRI1608	-0.0259034	-0.0259034	AHIQ01000016.1|12417	2.94662	3	3
590501	AWRI1608	-0.0675813	-0.0675813	AHIQ01000016.1|13417	2.86271	3	3
591501	AWRI1608	-0.0311489	-0.0311489	AHIQ01000016.1|14417	2.93592	3	3
592501	AWRI1608	-0.0226376	-0.0226376	AHIQ01000016.1|15417	2.95329	3	3
593501	AWRI1608	-0.0215582	-0.0215582	AHIQ01000016.1|16417	2.9555	3	3
594501	AWRI1608	0.00777763	0.00777763	AHIQ01000016.1|17417	3.01622	3	3
595501	AWRI1608	0.105077	0.105077	AHIQ01000016.1|18417	3.22666	3	3
596501	AWRI1608	0.0841132	0.0841132	AHIQ01000016.1|19417	3.18011	3	3
597501	AWRI1608	0.145908	0.145908	AHIQ01000016.1|20417	3.31928	3	3
598501	AWRI1608	0.215599	0.215599	AHIQ01000016.1|21417	3.48356	3	3
599501	AWRI1608	0.247455	0.247455	AHIQ01000016.1|22417	3.56133	3	3
600501	AWRI1608	0.203438	0.203438	AHIQ01000016.1|23417	3.45432	3	3
601501	AWRI1608	0.209048	0.209048	AHIQ01000016.1|24417	3.46778	3	3
602501	AWRI1608	0.134425	0.134425	AHIQ01000016.1|25417	3.29296	3	NA
603501	AWRI1608	-0.0397898	-0.0397898	AHIQ01000016.1|26417	2.91839	3	NA
604501	AWRI1608	NA	NA	NA	3	3	NA
605501	AWRI1608	NA	NA	NA	3	3	NA
606501	AWRI1608	NA	NA	NA	3	3	NA
607501	AWRI1608	NA	NA	NA	3	3	NA
608501	AWRI1608	NA	NA	NA	3	3	NA
609501	AWRI1608	NA	NA	NA	3	3	NA
610501	AWRI1608	NA	NA	NA	3	3	NA
611501	AWRI1608	NA	NA	NA	3	3	NA
612501	AWRI1608	NA	NA	NA	3	3	NA
613501	AWRI1608	-0.0887098	-0.0887098	AHIQ01000018.1|3442	2.82109	3	NA
614501	AWRI1608	-0.05601	-0.05601	AHIQ01000018.1|4442	2.88576	3	NA
615501	AWRI1608	-0.137953	-0.137953	AHIQ01000018.1|5442	2.72642	3	3
616501	AWRI1608	-0.146724	-0.146724	AHIQ01000018.1|6442	2.7099	3	3
617501	AWRI1608	-0.0829254	-0.0829254	AHIQ01000018.1|7442	2.83242	3	3
618501	AWRI1608	-0.0197229	-0.0197229	AHIQ01000018.1|8442	2.95927	3	3
619501	AWRI1608	0.0133454	0.0133454	AHIQ01000018.1|9442	3.02788	3	3
620501	AWRI1608	0.0844929	0.0844929	AHIQ01000018.1|10442	3.18094	3	3
621501	AWRI1608	0.146669	0.146669	AHIQ01000018.1|11442	3.32103	3	3
622501	AWRI1608	0.0962949	0.0962949	AHIQ01000018.1|12442	3.20707	3	3
623501	AWRI1608	0.0574649	0.0574649	AHIQ01000018.1|13442	3.12191	3	3
624501	AWRI1608	0.0762192	0.0762192	AHIQ01000018.1|14442	3.16275	3	3
625501	AWRI1608	-0.025641	-0.025641	AHIQ01000018.1|15442	2.94715	3	3
626501	AWRI1608	-0.108947	-0.108947	AHIQ01000018.1|16442	2.78179	3	3
627501	AWRI1608	-0.146744	-0.146744	AHIQ01000018.1|17442	2.70986	3	3
628501	AWRI1608	-0.201442	-0.201442	AHIQ01000018.1|18442	2.60904	3	3
629501	AWRI1608	-0.260494	-0.260494	AHIQ01000018.1|19442	2.50441	3	3
630501	AWRI1608	-0.184776	-0.184776	AHIQ01000018.1|20442	2.63936	3	3
631501	AWRI1608	-0.106403	-0.106403	AHIQ01000018.1|21442	2.7867	3	3
632501	AWRI1608	0.0459793	0.0459793	AHIQ01000018.1|22442	3.09715	3	3
633501	AWRI1608	0.16863	0.16863	AHIQ01000018.1|23442	3.37197	3	3
634501	AWRI1608	0.264269	0.264269	AHIQ01000018.1|24442	3.60308	3	3
635501	AWRI1608	0.314465	0.314465	AHIQ01000018.1|25442	3.73065	3	3
636501	AWRI1608	0.361332	0.361332	AHIQ01000018.1|26442	3.85383	3	4
637501	AWRI1608	0.290031	0.290031	AHIQ01000018.1|27442	3.668	3	4
638501	AWRI1608	0.238687	0.238687	AHIQ01000018.1|28442	3.53976	3	4
639501	AWRI1608	0.141782	0.141782	AHIQ01000018.1|29442	3.3098	3	3
640501	AWRI1608	0.112263	0.112263	AHIQ01000018.1|30442	3.24277	3	3
641501	AWRI1608	-0.0288122	-0.0288122	AHIQ01000018.1|31442	2.94068	3	3
642501	AWRI1608	-0.0463653	-0.0463653	AHIQ01000018.1|32442	2.90512	3	3
643501	AWRI1608	-0.132667	-0.132667	AHIQ01000018.1|33442	2.73643	3	3
644501	AWRI1608	-0.15053	-0.15053	AHIQ01000018.1|34442	2.70276	3	3
645501	AWRI1608	-0.188818	-0.188818	AHIQ01000018.1|35442	2.63197	3	3
646501	AWRI1608	-0.217971	-0.217971	AHIQ01000018.1|36442	2.57932	3	3
647501	AWRI1608	-0.185208	-0.185208	AHIQ01000018.1|37442	2.63857	3	3
648501	AWRI1608	-0.129185	-0.129185	AHIQ01000018.1|38442	2.74304	3	3
649501	AWRI1608	-0.0794038	-0.0794038	AHIQ01000018.1|39442	2.83935	3	3
650501	AWRI1608	-0.0165305	-0.0165305	AHIQ01000018.1|40442	2.96582	3	3
651501	AWRI1608	0.0541752	0.0541752	AHIQ01000018.1|41442	3.1148	3	3
652501	AWRI1608	0.00418313	0.00418313	AHIQ01000018.1|42442	3.00871	3	3
653501	AWRI1608	-0.0317499	-0.0317499	AHIQ01000018.1|43442	2.9347	3	3
654501	AWRI1608	-0.0309964	-0.0309964	AHIQ01000018.1|44442	2.93623	3	3
655501	AWRI1608	-0.187365	-0.187365	AHIQ01000018.1|45442	2.63463	3	3
656501	AWRI1608	-0.193822	-0.193822	AHIQ01000018.1|46442	2.62286	3	3
657501	AWRI1608	-0.182074	-0.182074	AHIQ01000018.1|47442	2.6443	3	3
658501	AWRI1608	-0.11282	-0.11282	AHIQ01000018.1|48442	2.77434	3	3
659501	AWRI1608	-0.116591	-0.116591	AHIQ01000018.1|49442	2.76709	3	3
660501	AWRI1608	-0.0383956	-0.0383956	AHIQ01000018.1|50442	2.92121	3	3
661501	AWRI1608	0.0315192	0.0315192	AHIQ01000018.1|51442	3.06626	3	3
662501	AWRI1608	0.0680401	0.0680401	AHIQ01000018.1|52442	3.14487	3	3
663501	AWRI1608	0.0131168	0.0131168	AHIQ01000018.1|53442	3.0274	3	3
664501	AWRI1608	0.0753609	0.0753609	AHIQ01000018.1|54442	3.16087	3	3
665501	AWRI1608	0.106834	0.106834	AHIQ01000018.1|55442	3.23059	3	3
666501	AWRI1608	0.0272557	0.0272557	AHIQ01000018.1|56442	3.05722	3	3
667501	AWRI1608	0.000805702	0.000805702	AHIQ01000018.1|57442	3.00168	3	3
668501	AWRI1608	0.0669999	0.0669999	AHIQ01000018.1|58442	3.14261	3	3
669501	AWRI1608	-0.0560853	-0.0560853	AHIQ01000018.1|59442	2.88561	3	3
670501	AWRI1608	-0.0539613	-0.0539613	AHIQ01000018.1|60442	2.88986	3	3
671501	AWRI1608	-0.0757382	-0.0757382	AHIQ01000018.1|61442	2.84657	3	3
672501	AWRI1608	-0.0798435	-0.0798435	AHIQ01000018.1|62442	2.83848	3	3
673501	AWRI1608	-0.162634	-0.162634	AHIQ01000018.1|63442	2.68018	3	3
674501	AWRI1608	-0.174194	-0.174194	AHIQ01000018.1|64442	2.65879	3	3
675501	AWRI1608	-0.297666	-0.297666	AHIQ01000018.1|65442	2.4407	3	3
676501	AWRI1608	-0.349247	-0.349247	AHIQ01000018.1|66442	2.35498	3	3
677501	AWRI1608	-0.40619	-0.40619	AHIQ01000018.1|67442	2.26384	3	3
678501	AWRI1608	-0.364458	-0.364458	AHIQ01000018.1|68442	2.33028	3	3
679501	AWRI1608	-0.258009	-0.258009	AHIQ01000018.1|69442	2.50872	3	3
680501	AWRI1608	-0.174806	-0.174806	AHIQ01000018.1|70442	2.65766	3	3
681501	AWRI1608	0.0106674	0.0106674	AHIQ01000018.1|71442	3.02226	3	3
682501	AWRI1608	0.080516	0.080516	AHIQ01000018.1|72442	3.17219	3	3
683501	AWRI1608	0.119251	0.119251	AHIQ01000018.1|73442	3.25851	3	3
684501	AWRI1608	0.123206	0.123206	AHIQ01000018.1|74442	3.26746	3	3
685501	AWRI1608	0.108765	0.108765	AHIQ01000018.1|75442	3.23491	3	3
686501	AWRI1608	-0.0147838	-0.0147838	AHIQ01000018.1|76442	2.96941	3	3
687501	AWRI1608	-0.0382191	-0.0382191	AHIQ01000018.1|77442	2.92157	3	3
688501	AWRI1608	-0.0878635	-0.0878635	AHIQ01000018.1|78442	2.82275	3	3
689501	AWRI1608	-0.0812544	-0.0812544	AHIQ01000018.1|79442	2.83571	3	3
690501	AWRI1608	-0.0453194	-0.0453194	AHIQ01000018.1|80442	2.90723	3	3
691501	AWRI1608	0.0198913	0.0198913	AHIQ01000018.1|81442	3.04165	3	3
692501	AWRI1608	0.020975	0.020975	AHIQ01000018.1|82442	3.04393	3	3
693501	AWRI1608	0.0627925	0.0627925	AHIQ01000018.1|83442	3.13346	3	3
694501	AWRI1608	0.032603	0.032603	AHIQ01000018.1|84442	3.06857	3	3
695501	AWRI1608	0.0750174	0.0750174	AHIQ01000018.1|85442	3.16012	3	3
696501	AWRI1608	0.0240343	0.0240343	AHIQ01000018.1|86442	3.0504	3	3
697501	AWRI1608	0.0394321	0.0394321	AHIQ01000018.1|87442	3.08313	3	3
698501	AWRI1608	0.0196683	0.0196683	AHIQ01000018.1|88442	3.04118	3	3
699501	AWRI1608	-0.000243452	-0.000243452	AHIQ01000018.1|89442	2.99949	3	3
700501	AWRI1608	0.01378	0.01378	AHIQ01000018.1|90442	3.02879	3	3
701501	AWRI1608	0.013771	0.013771	AHIQ01000018.1|91442	3.02877	3	3
702501	AWRI1608	-0.0332534	-0.0332534	AHIQ01000018.1|92442	2.93164	3	3
703501	AWRI1608	-0.0182838	-0.0182838	AHIQ01000018.1|93442	2.96222	3	3
704501	AWRI1608	0.0350816	0.0350816	AHIQ01000018.1|94442	3.07384	3	3
705501	AWRI1608	-0.00848226	-0.00848226	AHIQ01000018.1|95442	2.98241	3	3
706501	AWRI1608	0.0662613	0.0662613	AHIQ01000018.1|96442	3.141	3	3
707501	AWRI1608	0.0862749	0.0862749	AHIQ01000018.1|97442	3.18488	3	3
708501	AWRI1608	0.0517161	0.0517161	AHIQ01000018.1|98442	3.10949	3	3
709501	AWRI1608	0.00317705	0.00317705	AHIQ01000018.1|99442	3.00661	3	3
710501	AWRI1608	0.0144608	0.0144608	AHIQ01000018.1|100442	3.03022	3	3
711501	AWRI1608	-0.026493	-0.026493	AHIQ01000018.1|101442	2.94541	3	3
712501	AWRI1608	-0.0340543	-0.0340543	AHIQ01000018.1|102442	2.93002	3	3
713501	AWRI1608	0.00975124	0.00975124	AHIQ01000018.1|103442	3.02035	3	3
714501	AWRI1608	0.0547022	0.0547022	AHIQ01000018.1|104442	3.11593	3	3
715501	AWRI1608	0.0513364	0.0513364	AHIQ01000018.1|105442	3.10867	3	3
716501	AWRI1608	0.00464308	0.00464308	AHIQ01000018.1|106442	3.00967	3	3
717501	AWRI1608	0.0432297	0.0432297	AHIQ01000018.1|107442	3.09125	3	3
718501	AWRI1608	0.058386	0.058386	AHIQ01000018.1|108442	3.1239	3	3
719501	AWRI1608	0.00474677	0.00474677	AHIQ01000018.1|109442	3.00989	3	3
720501	AWRI1608	0.0252348	0.0252348	AHIQ01000018.1|110442	3.05294	3	3
721501	AWRI1608	0.0937541	0.0937541	AHIQ01000018.1|111442	3.20143	3	3
722501	AWRI1608	0.0914889	0.0914889	AHIQ01000018.1|112442	3.19641	3	3
723501	AWRI1608	-0.0162651	-0.0162651	AHIQ01000018.1|113442	2.96637	3	3
724501	AWRI1608	0.0044988	0.0044988	AHIQ01000018.1|114442	3.00937	3	3
725501	AWRI1608	0.00256765	0.00256765	AHIQ01000018.1|115442	3.00534	3	3
726501	AWRI1608	0.0318599	0.0318599	AHIQ01000018.1|116442	3.06699	3	3
727501	AWRI1608	0.0557992	0.0557992	AHIQ01000018.1|117442	3.1183	3	3
728501	AWRI1608	0.147416	0.147416	AHIQ01000018.1|118442	3.32275	3	3
729501	AWRI1608	0.166636	0.166636	AHIQ01000018.1|119442	3.36732	3	3
730501	AWRI1608	0.130075	0.130075	AHIQ01000018.1|120442	3.28305	3	3
731501	AWRI1608	0.0572823	0.0572823	AHIQ01000018.1|121442	3.12151	3	3
732501	AWRI1608	-0.0924182	-0.0924182	AHIQ01000018.1|122442	2.81385	3	3
733501	AWRI1608	-0.262657	-0.262657	AHIQ01000018.1|123442	2.50065	3	3
734501	AWRI1608	-0.36472	-0.36472	AHIQ01000018.1|124442	2.32986	3	3
735501	AWRI1608	-0.404794	-0.404794	AHIQ01000018.1|125442	2.26603	3	2
736501	AWRI1608	-0.518204	-0.518204	AHIQ01000018.1|126442	2.09472	3	2
737501	AWRI1608	-0.385894	-0.385894	AHIQ01000018.1|127442	2.29591	3	2
738501	AWRI1608	-0.222149	-0.222149	AHIQ01000018.1|128442	2.57186	3	2
739501	AWRI1608	-0.191517	-0.191517	AHIQ01000018.1|129442	2.62705	3	2
740501	AWRI1608	-0.179342	-0.179342	AHIQ01000018.1|130442	2.64932	3	3
741501	AWRI1608	-0.0736946	-0.0736946	AHIQ01000018.1|131442	2.8506	3	3
742501	AWRI1608	-0.0684537	-0.0684537	AHIQ01000018.1|132442	2.86098	3	3
743501	AWRI1608	-0.124074	-0.124074	AHIQ01000018.1|133442	2.75278	3	3
744501	AWRI1608	-0.195489	-0.195489	AHIQ01000018.1|134442	2.61983	3	3
745501	AWRI1608	-0.252061	-0.252061	AHIQ01000018.1|135442	2.51909	3	NA
746501	AWRI1608	-0.298011	-0.298011	AHIQ01000018.1|136442	2.44012	3	NA
747501	AWRI1608	NA	NA	NA	3	3	NA
748501	AWRI1608	NA	NA	NA	3	3	NA
749501	AWRI1608	NA	NA	NA	3	3	NA
750501	AWRI1608	NA	NA	NA	3	3	NA
751501	AWRI1608	NA	NA	NA	3	3	NA
752501	AWRI1608	0.105998	0.105998	AHIQ01000019.1|2980	3.22872	3	NA
753501	AWRI1608	0.132346	0.132346	AHIQ01000019.1|3980	3.28822	3	NA
754501	AWRI1608	0.092134	0.092134	AHIQ01000019.1|4980	3.19784	3	3
755501	AWRI1608	0.0903508	0.0903508	AHIQ01000019.1|5980	3.19389	3	3
756501	AWRI1608	0.0519997	0.0519997	AHIQ01000019.1|6980	3.1101	3	3
757501	AWRI1608	0.0654057	0.0654057	AHIQ01000019.1|7980	3.13914	3	3
758501	AWRI1608	-0.00986605	-0.00986605	AHIQ01000019.1|8980	2.97955	3	3
759501	AWRI1608	-0.0688854	-0.0688854	AHIQ01000019.1|9980	2.86012	3	3
760501	AWRI1608	-0.112757	-0.112757	AHIQ01000019.1|10980	2.77446	3	3
761501	AWRI1608	-0.0884838	-0.0884838	AHIQ01000019.1|11980	2.82153	3	3
762501	AWRI1608	-0.201042	-0.201042	AHIQ01000019.1|12980	2.60977	3	3
763501	AWRI1608	-0.123877	-0.123877	AHIQ01000019.1|13980	2.75315	3	3
764501	AWRI1608	-0.146494	-0.146494	AHIQ01000019.1|14980	2.71033	3	3
765501	AWRI1608	-0.110939	-0.110939	AHIQ01000019.1|15980	2.77796	3	3
766501	AWRI1608	-0.103348	-0.103348	AHIQ01000019.1|16980	2.79261	3	3
767501	AWRI1608	0.0519343	0.0519343	AHIQ01000019.1|17980	3.10996	3	3
768501	AWRI1608	0.138079	0.138079	AHIQ01000019.1|18980	3.30132	3	3
769501	AWRI1608	0.25901	0.25901	AHIQ01000019.1|19980	3.58997	3	3
770501	AWRI1608	0.257009	0.257009	AHIQ01000019.1|20980	3.585	3	3
771501	AWRI1608	0.24027	0.24027	AHIQ01000019.1|21980	3.54364	3	3
772501	AWRI1608	0.191331	0.191331	AHIQ01000019.1|22980	3.42545	3	3
773501	AWRI1608	0.113112	0.113112	AHIQ01000019.1|23980	3.24468	3	3
774501	AWRI1608	0.0797501	0.0797501	AHIQ01000019.1|24980	3.1705	3	NA
775501	AWRI1608	0.01511	0.01511	AHIQ01000019.1|25980	3.03159	3	NA
776501	AWRI1608	NA	NA	NA	3	3	NA
777501	AWRI1608	NA	NA	NA	3	3	NA
778501	AWRI1608	NA	NA	NA	3	3	NA
779501	AWRI1608	NA	NA	NA	3	3	NA
780501	AWRI1608	NA	NA	NA	3	3	NA
781501	AWRI1608	0.0663909	0.0663909	AHIQ01000020.1|2913	3.14128	3	NA
782501	AWRI1608	0.216246	0.216246	AHIQ01000020.1|3913	3.48512	3	NA
783501	AWRI1608	0.238772	0.238772	AHIQ01000020.1|4913	3.53996	3	3
784501	AWRI1608	0.224565	0.224565	AHIQ01000020.1|5913	3.50528	3	3
785501	AWRI1608	0.22145	0.22145	AHIQ01000020.1|6913	3.49771	3	3
786501	AWRI1608	0.161429	0.161429	AHIQ01000020.1|7913	3.35518	3	3
787501	AWRI1608	0.187976	0.187976	AHIQ01000020.1|8913	3.41749	3	3
788501	AWRI1608	0.166806	0.166806	AHIQ01000020.1|9913	3.36771	3	3
789501	AWRI1608	0.196531	0.196531	AHIQ01000020.1|10913	3.43782	3	3
790501	AWRI1608	0.271404	0.271404	AHIQ01000020.1|11913	3.62094	3	3
791501	AWRI1608	0.329618	0.329618	AHIQ01000020.1|12913	3.77004	3	4
792501	AWRI1608	0.343113	0.343113	AHIQ01000020.1|13913	3.80547	3	4
793501	AWRI1608	0.33774	0.33774	AHIQ01000020.1|14913	3.79133	3	4
794501	AWRI1608	0.302188	0.302188	AHIQ01000020.1|15913	3.69904	3	4
795501	AWRI1608	0.258957	0.258957	AHIQ01000020.1|16913	3.58984	3	4
796501	AWRI1608	0.295267	0.295267	AHIQ01000020.1|17913	3.68134	3	4
797501	AWRI1608	0.33087	0.33087	AHIQ01000020.1|18913	3.77331	3	4
798501	AWRI1608	0.311665	0.311665	AHIQ01000020.1|19913	3.72342	3	4
799501	AWRI1608	0.321192	0.321192	AHIQ01000020.1|20913	3.74809	3	4
800501	AWRI1608	0.278238	0.278238	AHIQ01000020.1|21913	3.63814	3	4
801501	AWRI1608	0.212499	0.212499	AHIQ01000020.1|22913	3.47608	3	4
802501	AWRI1608	0.13941	0.13941	AHIQ01000020.1|23913	3.30436	3	4
803501	AWRI1608	0.184549	0.184549	AHIQ01000020.1|24913	3.40939	3	4
804501	AWRI1608	0.236792	0.236792	AHIQ01000020.1|25913	3.53511	3	4
805501	AWRI1608	0.319573	0.319573	AHIQ01000020.1|26913	3.74388	3	4
806501	AWRI1608	0.336544	0.336544	AHIQ01000020.1|27913	3.78818	3	4
807501	AWRI1608	0.358438	0.358438	AHIQ01000020.1|28913	3.84611	3	4
808501	AWRI1608	0.348949	0.348949	AHIQ01000020.1|29913	3.8209	3	4
809501	AWRI1608	0.232495	0.232495	AHIQ01000020.1|30913	3.52459	3	4
810501	AWRI1608	0.187655	0.187655	AHIQ01000020.1|31913	3.41673	3	4
811501	AWRI1608	0.106641	0.106641	AHIQ01000020.1|32913	3.23015	3	3
812501	AWRI1608	0.0414201	0.0414201	AHIQ01000020.1|33913	3.08738	3	3
813501	AWRI1608	-0.00795458	-0.00795458	AHIQ01000020.1|34913	2.9835	3	3
814501	AWRI1608	0.056082	0.056082	AHIQ01000020.1|35913	3.11892	3	3
815501	AWRI1608	0.0338495	0.0338495	AHIQ01000020.1|36913	3.07122	3	3
816501	AWRI1608	0.0791337	0.0791337	AHIQ01000020.1|37913	3.16915	3	3
817501	AWRI1608	0.111824	0.111824	AHIQ01000020.1|38913	3.24178	3	3
818501	AWRI1608	0.107237	0.107237	AHIQ01000020.1|39913	3.23149	3	3
819501	AWRI1608	0.112589	0.112589	AHIQ01000020.1|40913	3.2435	3	3
820501	AWRI1608	0.104169	0.104169	AHIQ01000020.1|41913	3.22462	3	3
821501	AWRI1608	0.131442	0.131442	AHIQ01000020.1|42913	3.28616	3	3
822501	AWRI1608	0.189242	0.189242	AHIQ01000020.1|43913	3.42049	3	3
823501	AWRI1608	0.185488	0.185488	AHIQ01000020.1|44913	3.41161	3	3
824501	AWRI1608	0.147931	0.147931	AHIQ01000020.1|45913	3.32394	3	3
825501	AWRI1608	0.105695	0.105695	AHIQ01000020.1|46913	3.22804	3	3
826501	AWRI1608	0.0707644	0.0707644	AHIQ01000020.1|47913	3.15082	3	3
827501	AWRI1608	-0.0141761	-0.0141761	AHIQ01000020.1|48913	2.97067	3	3
828501	AWRI1608	-0.0619328	-0.0619328	AHIQ01000020.1|49913	2.87394	3	3
829501	AWRI1608	-0.0733138	-0.0733138	AHIQ01000020.1|50913	2.85136	3	3
830501	AWRI1608	-0.0912469	-0.0912469	AHIQ01000020.1|51913	2.81613	3	3
831501	AWRI1608	-0.11004	-0.11004	AHIQ01000020.1|52913	2.77969	3	3
832501	AWRI1608	-0.131567	-0.131567	AHIQ01000020.1|53913	2.73852	3	3
833501	AWRI1608	-0.0300863	-0.0300863	AHIQ01000020.1|54913	2.93809	3	3
834501	AWRI1608	0.0114754	0.0114754	AHIQ01000020.1|55913	3.02396	3	3
835501	AWRI1608	0.110978	0.110978	AHIQ01000020.1|56913	3.23988	3	3
836501	AWRI1608	0.154927	0.154927	AHIQ01000020.1|57913	3.3401	3	3
837501	AWRI1608	0.222954	0.222954	AHIQ01000020.1|58913	3.50136	3	3
838501	AWRI1608	0.19505	0.19505	AHIQ01000020.1|59913	3.43429	3	3
839501	AWRI1608	0.172018	0.172018	AHIQ01000020.1|60913	3.3799	3	3
840501	AWRI1608	0.148706	0.148706	AHIQ01000020.1|61913	3.32572	3	3
841501	AWRI1608	0.0912809	0.0912809	AHIQ01000020.1|62913	3.19595	3	3
842501	AWRI1608	0.0617918	0.0617918	AHIQ01000020.1|63913	3.13128	3	3
843501	AWRI1608	0.0436115	0.0436115	AHIQ01000020.1|64913	3.09207	3	3
844501	AWRI1608	0.0581905	0.0581905	AHIQ01000020.1|65913	3.12348	3	3
845501	AWRI1608	0.104547	0.104547	AHIQ01000020.1|66913	3.22547	3	NA
846501	AWRI1608	0.115294	0.115294	AHIQ01000020.1|67913	3.24959	3	NA
847501	AWRI1608	NA	NA	NA	3	3	NA
848501	AWRI1608	NA	NA	NA	3	3	NA
849501	AWRI1608	NA	NA	NA	3	3	NA
850501	AWRI1608	NA	NA	NA	3	3	NA
851501	AWRI1608	NA	NA	NA	3	3	NA
852501	AWRI1608	-0.182742	-0.182742	AHIQ01000021.1|2672	2.64308	3	NA
853501	AWRI1608	-0.0242052	-0.0242052	AHIQ01000021.1|3672	2.95009	3	NA
854501	AWRI1608	NA	NA	NA	3	3	NA
855501	AWRI1608	NA	NA	NA	3	3	NA
856501	AWRI1608	NA	NA	NA	3	3	NA
857501	AWRI1608	NA	NA	NA	3	3	NA
858501	AWRI1608	NA	NA	NA	3	3	NA
859501	AWRI1608	0.22228	0.22228	AHIQ01000022.1|3045	3.49973	3	NA
860501	AWRI1608	0.280705	0.280705	AHIQ01000022.1|4045	3.64436	3	NA
861501	AWRI1608	0.302401	0.302401	AHIQ01000022.1|5045	3.69958	3	3
862501	AWRI1608	0.255915	0.255915	AHIQ01000022.1|6045	3.58228	3	3
863501	AWRI1608	0.242172	0.242172	AHIQ01000022.1|7045	3.54831	3	3
864501	AWRI1608	0.251305	0.251305	AHIQ01000022.1|8045	3.57085	3	3
865501	AWRI1608	0.241024	0.241024	AHIQ01000022.1|9045	3.54549	3	3
866501	AWRI1608	0.200681	0.200681	AHIQ01000022.1|10045	3.44772	3	3
867501	AWRI1608	0.187972	0.187972	AHIQ01000022.1|11045	3.41748	3	3
868501	AWRI1608	0.166503	0.166503	AHIQ01000022.1|12045	3.367	3	3
869501	AWRI1608	0.147616	0.147616	AHIQ01000022.1|13045	3.32321	3	3
870501	AWRI1608	0.176704	0.176704	AHIQ01000022.1|14045	3.39089	3	3
871501	AWRI1608	0.163259	0.163259	AHIQ01000022.1|15045	3.35944	3	3
872501	AWRI1608	0.213927	0.213927	AHIQ01000022.1|16045	3.47952	3	3
873501	AWRI1608	0.198543	0.198543	AHIQ01000022.1|17045	3.44262	3	3
874501	AWRI1608	0.226936	0.226936	AHIQ01000022.1|18045	3.51104	3	3
875501	AWRI1608	0.273261	0.273261	AHIQ01000022.1|19045	3.62561	3	3
876501	AWRI1608	0.26773	0.26773	AHIQ01000022.1|20045	3.61174	3	3
877501	AWRI1608	0.174737	0.174737	AHIQ01000022.1|21045	3.38628	3	3
878501	AWRI1608	0.164374	0.164374	AHIQ01000022.1|22045	3.36204	3	3
879501	AWRI1608	0.117576	0.117576	AHIQ01000022.1|23045	3.25473	3	3
880501	AWRI1608	0.0329921	0.0329921	AHIQ01000022.1|24045	3.0694	3	3
881501	AWRI1608	-0.00512843	-0.00512843	AHIQ01000022.1|25045	2.98935	3	3
882501	AWRI1608	0.00407038	0.00407038	AHIQ01000022.1|26045	3.00848	3	3
883501	AWRI1608	-0.00126621	-0.00126621	AHIQ01000022.1|27045	2.99737	3	3
884501	AWRI1608	0.00845229	0.00845229	AHIQ01000022.1|28045	3.01763	3	3
885501	AWRI1608	0.0421319	0.0421319	AHIQ01000022.1|29045	3.0889	3	3
886501	AWRI1608	0.0395861	0.0395861	AHIQ01000022.1|30045	3.08346	3	3
887501	AWRI1608	0.0694202	0.0694202	AHIQ01000022.1|31045	3.14788	3	3
888501	AWRI1608	0.115628	0.115628	AHIQ01000022.1|32045	3.25034	3	3
889501	AWRI1608	0.101051	0.101051	AHIQ01000022.1|33045	3.21766	3	3
890501	AWRI1608	0.053892	0.053892	AHIQ01000022.1|34045	3.11418	3	3
891501	AWRI1608	0.148669	0.148669	AHIQ01000022.1|35045	3.32564	3	3
892501	AWRI1608	0.149893	0.149893	AHIQ01000022.1|36045	3.32846	3	3
893501	AWRI1608	0.0952579	0.0952579	AHIQ01000022.1|37045	3.20477	3	3
894501	AWRI1608	0.120371	0.120371	AHIQ01000022.1|38045	3.26104	3	3
895501	AWRI1608	0.172267	0.172267	AHIQ01000022.1|39045	3.38048	3	3
896501	AWRI1608	0.102632	0.102632	AHIQ01000022.1|40045	3.22119	3	3
897501	AWRI1608	-0.183784	-0.183784	AHIQ01000022.1|41045	2.64117	3	3
898501	AWRI1608	-0.11615	-0.11615	AHIQ01000022.1|42045	2.76794	3	3
899501	AWRI1608	-0.217193	-0.217193	AHIQ01000022.1|43045	2.58071	3	3
900501	AWRI1608	-0.264558	-0.264558	AHIQ01000022.1|44045	2.49736	3	3
901501	AWRI1608	-0.233596	-0.233596	AHIQ01000022.1|45045	2.55154	3	3
902501	AWRI1608	0.123928	0.123928	AHIQ01000022.1|46045	3.26909	3	3
903501	AWRI1608	0.200906	0.200906	AHIQ01000022.1|47045	3.44826	3	3
904501	AWRI1608	0.289117	0.289117	AHIQ01000022.1|48045	3.66568	3	3
905501	AWRI1608	0.30513	0.30513	AHIQ01000022.1|49045	3.70659	3	4
906501	AWRI1608	0.340468	0.340468	AHIQ01000022.1|50045	3.7985	3	4
907501	AWRI1608	0.296811	0.296811	AHIQ01000022.1|51045	3.68528	3	4
908501	AWRI1608	0.168388	0.168388	AHIQ01000022.1|52045	3.37141	3	4
909501	AWRI1608	0.0715437	0.0715437	AHIQ01000022.1|53045	3.15252	3	3
910501	AWRI1608	-0.0123958	-0.0123958	AHIQ01000022.1|54045	2.97433	3	3
911501	AWRI1608	-0.177996	-0.177996	AHIQ01000022.1|55045	2.65179	3	3
912501	AWRI1608	-0.197541	-0.197541	AHIQ01000022.1|56045	2.61611	3	3
913501	AWRI1608	-0.191609	-0.191609	AHIQ01000022.1|57045	2.62688	3	3
914501	AWRI1608	-0.116959	-0.116959	AHIQ01000022.1|58045	2.76639	3	3
915501	AWRI1608	-0.0380658	-0.0380658	AHIQ01000022.1|59045	2.92188	3	3
916501	AWRI1608	0.0795746	0.0795746	AHIQ01000022.1|60045	3.17012	3	3
917501	AWRI1608	0.129194	0.129194	AHIQ01000022.1|61045	3.28105	3	3
918501	AWRI1608	0.260215	0.260215	AHIQ01000022.1|62045	3.59297	3	3
919501	AWRI1608	0.291133	0.291133	AHIQ01000022.1|63045	3.6708	3	3
920501	AWRI1608	0.277562	0.277562	AHIQ01000022.1|64045	3.63644	3	3
921501	AWRI1608	0.274103	0.274103	AHIQ01000022.1|65045	3.62773	3	3
922501	AWRI1608	0.21429	0.21429	AHIQ01000022.1|66045	3.4804	3	3
923501	AWRI1608	0.147931	0.147931	AHIQ01000022.1|67045	3.32394	3	3
924501	AWRI1608	0.106313	0.106313	AHIQ01000022.1|68045	3.22942	3	3
925501	AWRI1608	0.132866	0.132866	AHIQ01000022.1|69045	3.28941	3	NA
926501	AWRI1608	0.0604695	0.0604695	AHIQ01000022.1|70045	3.12842	3	NA
927501	AWRI1608	NA	NA	NA	3	3	NA
928501	AWRI1608	NA	NA	NA	3	3	NA
929501	AWRI1608	NA	NA	NA	3	3	NA
930501	AWRI1608	NA	NA	NA	3	3	NA
931501	AWRI1608	NA	NA	NA	3	3	NA
932501	AWRI1608	-0.127865	-0.127865	AHIQ01000023.1|3001	2.74555	3	NA
933501	AWRI1608	-0.253155	-0.253155	AHIQ01000023.1|4001	2.51718	3	NA
934501	AWRI1608	-0.38313	-0.38313	AHIQ01000023.1|5001	2.30032	3	2
935501	AWRI1608	-0.464411	-0.464411	AHIQ01000023.1|6001	2.1743	3	2
936501	AWRI1608	-0.688102	-0.688102	AHIQ01000023.1|7001	1.86201	3	2
937501	AWRI1608	-0.638316	-0.638316	AHIQ01000023.1|8001	1.92739	3	2
938501	AWRI1608	-0.58052	-0.58052	AHIQ01000023.1|9001	2.00617	3	2
939501	AWRI1608	-0.533037	-0.533037	AHIQ01000023.1|10001	2.0733	3	2
940501	AWRI1608	-0.527569	-0.527569	AHIQ01000023.1|11001	2.08117	3	2
941501	AWRI1608	-0.40556	-0.40556	AHIQ01000023.1|12001	2.26483	3	2
942501	AWRI1608	-0.396071	-0.396071	AHIQ01000023.1|13001	2.27977	3	2
943501	AWRI1608	-0.303733	-0.303733	AHIQ01000023.1|14001	2.43046	3	2
944501	AWRI1608	-0.085342	-0.085342	AHIQ01000023.1|15001	2.82768	3	3
945501	AWRI1608	0.00741768	0.00741768	AHIQ01000023.1|16001	3.01546	3	3
946501	AWRI1608	0.130583	0.130583	AHIQ01000023.1|17001	3.28421	3	3
947501	AWRI1608	0.168605	0.168605	AHIQ01000023.1|18001	3.37191	3	3
948501	AWRI1608	0.228674	0.228674	AHIQ01000023.1|19001	3.51527	3	3
949501	AWRI1608	0.173535	0.173535	AHIQ01000023.1|20001	3.38346	3	3
950501	AWRI1608	0.225157	0.225157	AHIQ01000023.1|21001	3.50671	3	3
951501	AWRI1608	0.148216	0.148216	AHIQ01000023.1|22001	3.3246	3	3
952501	AWRI1608	0.0869352	0.0869352	AHIQ01000023.1|23001	3.18633	3	3
953501	AWRI1608	0.0452957	0.0452957	AHIQ01000023.1|24001	3.09568	3	3
954501	AWRI1608	0.100591	0.100591	AHIQ01000023.1|25001	3.21664	3	3
955501	AWRI1608	0.0494495	0.0494495	AHIQ01000023.1|26001	3.10461	3	3
956501	AWRI1608	0.0791465	0.0791465	AHIQ01000023.1|27001	3.16918	3	3
957501	AWRI1608	0.0727183	0.0727183	AHIQ01000023.1|28001	3.15509	3	3
958501	AWRI1608	-0.0868736	-0.0868736	AHIQ01000023.1|29001	2.82468	3	NA
959501	AWRI1608	-0.184062	-0.184062	AHIQ01000023.1|30001	2.64066	3	NA
960501	AWRI1608	NA	NA	NA	3	3	NA
961501	AWRI1608	NA	NA	NA	3	3	NA
962501	AWRI1608	NA	NA	NA	3	3	NA
963501	AWRI1608	NA	NA	NA	3	3	NA
964501	AWRI1608	NA	NA	NA	3	3	NA
965501	AWRI1608	-0.11849	-0.11849	AHIQ01000024.1|3008	2.76345	3	NA
966501	AWRI1608	-0.0623011	-0.0623011	AHIQ01000024.1|4008	2.87321	3	NA
967501	AWRI1608	-0.0501068	-0.0501068	AHIQ01000024.1|5008	2.89759	3	3
968501	AWRI1608	0.00785861	0.00785861	AHIQ01000024.1|6008	3.01639	3	3
969501	AWRI1608	-0.0236993	-0.0236993	AHIQ01000024.1|7008	2.95112	3	3
970501	AWRI1608	-0.0231293	-0.0231293	AHIQ01000024.1|8008	2.95229	3	3
971501	AWRI1608	-0.00110324	-0.00110324	AHIQ01000024.1|9008	2.99771	3	3
972501	AWRI1608	0.0799341	0.0799341	AHIQ01000024.1|10008	3.17091	3	3
973501	AWRI1608	0.0669481	0.0669481	AHIQ01000024.1|11008	3.1425	3	3
974501	AWRI1608	0.0298986	0.0298986	AHIQ01000024.1|12008	3.06282	3	3
975501	AWRI1608	0.0246436	0.0246436	AHIQ01000024.1|13008	3.05168	3	3
976501	AWRI1608	0.0676129	0.0676129	AHIQ01000024.1|14008	3.14394	3	3
977501	AWRI1608	0.022895	0.022895	AHIQ01000024.1|15008	3.04799	3	3
978501	AWRI1608	0.0411124	0.0411124	AHIQ01000024.1|16008	3.08672	3	3
979501	AWRI1608	0.137191	0.137191	AHIQ01000024.1|17008	3.29929	3	3
980501	AWRI1608	0.155	0.155	AHIQ01000024.1|18008	3.34026	3	NA
981501	AWRI1608	0.140231	0.140231	AHIQ01000024.1|19008	3.30625	3	NA
982501	AWRI1608	NA	NA	NA	3	3	NA
983501	AWRI1608	NA	NA	NA	3	3	NA
984501	AWRI1608	NA	NA	NA	3	3	NA
985501	AWRI1608	NA	NA	NA	3	3	NA
986501	AWRI1608	NA	NA	NA	3	3	NA
987501	AWRI1608	0.0676992	0.0676992	AHIQ01000025.1|2995	3.14413	3	NA
988501	AWRI1608	0.0570432	0.0570432	AHIQ01000025.1|3995	3.12099	3	NA
989501	AWRI1608	0.10304	0.10304	AHIQ01000025.1|4995	3.2221	3	3
990501	AWRI1608	0.108127	0.108127	AHIQ01000025.1|5995	3.23348	3	3
991501	AWRI1608	0.0538571	0.0538571	AHIQ01000025.1|6995	3.11411	3	3
992501	AWRI1608	0.0142414	0.0142414	AHIQ01000025.1|7995	3.02976	3	3
993501	AWRI1608	-0.118431	-0.118431	AHIQ01000025.1|8995	2.76357	3	3
994501	AWRI1608	-0.249886	-0.249886	AHIQ01000025.1|9995	2.52289	3	3
995501	AWRI1608	-0.388609	-0.388609	AHIQ01000025.1|10995	2.2916	3	3
996501	AWRI1608	-0.469825	-0.469825	AHIQ01000025.1|11995	2.16616	3	2
997501	AWRI1608	-0.475015	-0.475015	AHIQ01000025.1|12995	2.15838	3	2
998501	AWRI1608	-0.256214	-0.256214	AHIQ01000025.1|13995	2.51185	3	2
999501	AWRI1608	-0.0700434	-0.0700434	AHIQ01000025.1|14995	2.85783	3	3
1000501	AWRI1608	0.0973227	0.0973227	AHIQ01000025.1|15995	3.20936	3	3
1001501	AWRI1608	0.154208	0.154208	AHIQ01000025.1|16995	3.33843	3	3
1002501	AWRI1608	0.253595	0.253595	AHIQ01000025.1|17995	3.57652	3	3
1003501	AWRI1608	0.267756	0.267756	AHIQ01000025.1|18995	3.6118	3	3
1004501	AWRI1608	0.24294	0.24294	AHIQ01000025.1|19995	3.55021	3	3
1005501	AWRI1608	0.258753	0.258753	AHIQ01000025.1|20995	3.58933	3	3
1006501	AWRI1608	0.29882	0.29882	AHIQ01000025.1|21995	3.69041	3	3
1007501	AWRI1608	0.305815	0.305815	AHIQ01000025.1|22995	3.70835	3	3
1008501	AWRI1608	0.297069	0.297069	AHIQ01000025.1|23995	3.68594	3	3
1009501	AWRI1608	0.234991	0.234991	AHIQ01000025.1|24995	3.5307	3	3
1010501	AWRI1608	0.184681	0.184681	AHIQ01000025.1|25995	3.4097	3	3
1011501	AWRI1608	0.0861471	0.0861471	AHIQ01000025.1|26995	3.18459	3	3
1012501	AWRI1608	0.00840732	0.00840732	AHIQ01000025.1|27995	3.01753	3	3
1013501	AWRI1608	0.00301457	0.00301457	AHIQ01000025.1|28995	3.00628	3	3
1014501	AWRI1608	0.161946	0.161946	AHIQ01000025.1|29995	3.35639	3	3
1015501	AWRI1608	0.212113	0.212113	AHIQ01000025.1|30995	3.47515	3	3
1016501	AWRI1608	0.333657	0.333657	AHIQ01000025.1|31995	3.78061	3	3
1017501	AWRI1608	0.307724	0.307724	AHIQ01000025.1|32995	3.71326	3	3
1018501	AWRI1608	0.267388	0.267388	AHIQ01000025.1|33995	3.61088	3	3
1019501	AWRI1608	0.193678	0.193678	AHIQ01000025.1|34995	3.43103	3	3
1020501	AWRI1608	0.0380275	0.0380275	AHIQ01000025.1|35995	3.08013	3	3
1021501	AWRI1608	-0.0111828	-0.0111828	AHIQ01000025.1|36995	2.97684	3	3
1022501	AWRI1608	0.128495	0.128495	AHIQ01000025.1|37995	3.27946	3	3
1023501	AWRI1608	0.139365	0.139365	AHIQ01000025.1|38995	3.30426	3	3
1024501	AWRI1608	0.154155	0.154155	AHIQ01000025.1|39995	3.33831	3	NA
1025501	AWRI1608	0.218222	0.218222	AHIQ01000025.1|40995	3.4899	3	NA
1026501	AWRI1608	NA	NA	NA	3	3	NA
1027501	AWRI1608	NA	NA	NA	3	3	NA
1028501	AWRI1608	NA	NA	NA	3	3	NA
1029501	AWRI1608	NA	NA	NA	3	3	NA
1030501	AWRI1608	NA	NA	NA	3	3	NA
1031501	AWRI1608	-0.0192782	-0.0192782	AHIQ01000026.1|2836	2.96018	3	NA
1032501	AWRI1608	0.0659719	0.0659719	AHIQ01000026.1|3836	3.14037	3	NA
1033501	AWRI1608	0.0975256	0.0975256	AHIQ01000026.1|4836	3.20981	3	3
1034501	AWRI1608	-0.00399861	-0.00399861	AHIQ01000026.1|5836	2.9917	3	3
1035501	AWRI1608	-0.0170201	-0.0170201	AHIQ01000026.1|6836	2.96482	3	3
1036501	AWRI1608	-0.0263364	-0.0263364	AHIQ01000026.1|7836	2.94573	3	3
1037501	AWRI1608	-0.00735436	-0.00735436	AHIQ01000026.1|8836	2.98475	3	3
1038501	AWRI1608	0.000602262	0.000602262	AHIQ01000026.1|9836	3.00125	3	3
1039501	AWRI1608	0.155406	0.155406	AHIQ01000026.1|10836	3.34121	3	3
1040501	AWRI1608	0.18257	0.18257	AHIQ01000026.1|11836	3.40471	3	3
1041501	AWRI1608	0.235502	0.235502	AHIQ01000026.1|12836	3.53195	3	3
1042501	AWRI1608	0.227709	0.227709	AHIQ01000026.1|13836	3.51292	3	3
1043501	AWRI1608	0.20482	0.20482	AHIQ01000026.1|14836	3.45763	3	3
1044501	AWRI1608	0.173803	0.173803	AHIQ01000026.1|15836	3.38409	3	3
1045501	AWRI1608	0.127812	0.127812	AHIQ01000026.1|16836	3.27791	3	3
1046501	AWRI1608	0.122666	0.122666	AHIQ01000026.1|17836	3.26623	3	3
1047501	AWRI1608	0.122666	0.122666	AHIQ01000026.1|18836	3.26623	3	3
1048501	AWRI1608	0.0889396	0.0889396	AHIQ01000026.1|19836	3.19076	3	3
1049501	AWRI1608	0.102392	0.102392	AHIQ01000026.1|20836	3.22066	3	3
1050501	AWRI1608	0.127088	0.127088	AHIQ01000026.1|21836	3.27626	3	3
1051501	AWRI1608	0.090886	0.090886	AHIQ01000026.1|22836	3.19507	3	3
1052501	AWRI1608	0.182032	0.182032	AHIQ01000026.1|23836	3.40344	3	3
1053501	AWRI1608	0.218525	0.218525	AHIQ01000026.1|24836	3.49063	3	3
1054501	AWRI1608	0.206832	0.206832	AHIQ01000026.1|25836	3.46245	3	3
1055501	AWRI1608	0.221023	0.221023	AHIQ01000026.1|26836	3.49668	3	3
1056501	AWRI1608	0.219633	0.219633	AHIQ01000026.1|27836	3.49331	3	NA
1057501	AWRI1608	0.157298	0.157298	AHIQ01000026.1|28836	3.34559	3	NA
1058501	AWRI1608	NA	NA	NA	3	3	NA
1059501	AWRI1608	NA	NA	NA	3	3	NA
1060501	AWRI1608	NA	NA	NA	3	3	NA
1061501	AWRI1608	NA	NA	NA	3	3	NA
1062501	AWRI1608	NA	NA	NA	3	3	NA
1063501	AWRI1608	-0.157434	-0.157434	AHIQ01000027.1|3236	2.68985	3	NA
1064501	AWRI1608	-0.120107	-0.120107	AHIQ01000027.1|4236	2.76036	3	NA
1065501	AWRI1608	-0.238433	-0.238433	AHIQ01000027.1|5236	2.543	3	3
1066501	AWRI1608	-0.305202	-0.305202	AHIQ01000027.1|6236	2.42799	3	3
1067501	AWRI1608	-0.32578	-0.32578	AHIQ01000027.1|7236	2.3936	3	3
1068501	AWRI1608	-0.379843	-0.379843	AHIQ01000027.1|8236	2.30556	3	3
1069501	AWRI1608	-0.379484	-0.379484	AHIQ01000027.1|9236	2.30614	3	3
1070501	AWRI1608	-0.205171	-0.205171	AHIQ01000027.1|10236	2.60231	3	3
1071501	AWRI1608	-0.108337	-0.108337	AHIQ01000027.1|11236	2.78297	3	3
1072501	AWRI1608	-0.154869	-0.154869	AHIQ01000027.1|12236	2.69464	3	3
1073501	AWRI1608	-0.177571	-0.177571	AHIQ01000027.1|13236	2.65257	3	3
1074501	AWRI1608	-0.227403	-0.227403	AHIQ01000027.1|14236	2.56251	3	3
1075501	AWRI1608	-0.363305	-0.363305	AHIQ01000027.1|15236	2.33214	3	3
1076501	AWRI1608	-0.480281	-0.480281	AHIQ01000027.1|16236	2.15051	3	2
1077501	AWRI1608	-0.443199	-0.443199	AHIQ01000027.1|17236	2.20651	3	2
1078501	AWRI1608	-0.428192	-0.428192	AHIQ01000027.1|18236	2.22958	3	2
1079501	AWRI1608	-0.388053	-0.388053	AHIQ01000027.1|19236	2.29248	3	2
1080501	AWRI1608	-0.343611	-0.343611	AHIQ01000027.1|20236	2.3642	3	2
1081501	AWRI1608	-0.272065	-0.272065	AHIQ01000027.1|21236	2.4844	3	2
1082501	AWRI1608	-0.23223	-0.23223	AHIQ01000027.1|22236	2.55395	3	2
1083501	AWRI1608	-0.173729	-0.173729	AHIQ01000027.1|23236	2.65964	3	2
1084501	AWRI1608	-0.150063	-0.150063	AHIQ01000027.1|24236	2.70363	3	2
1085501	AWRI1608	-0.256193	-0.256193	AHIQ01000027.1|25236	2.51188	3	2
1086501	AWRI1608	-0.341277	-0.341277	AHIQ01000027.1|26236	2.36803	3	2
1087501	AWRI1608	-0.678218	-0.678218	AHIQ01000027.1|27236	1.87481	3	NA
1088501	AWRI1608	-0.812048	-0.812048	AHIQ01000027.1|28236	1.70872	3	NA
1089501	AWRI1608	NA	NA	NA	3	3	NA
1090501	AWRI1608	NA	NA	NA	3	3	NA
1091501	AWRI1608	NA	NA	NA	3	3	NA
1092501	AWRI1608	NA	NA	NA	3	3	NA
1093501	AWRI1608	NA	NA	NA	3	3	NA
1094501	AWRI1608	0.0647918	0.0647918	AHIQ01000028.1|2503	3.1378	3	NA
1095501	AWRI1608	NA	NA	NA	3	3	NA
1096501	AWRI1608	NA	NA	NA	3	3	NA
1097501	AWRI1608	NA	NA	NA	3	3	NA
1098501	AWRI1608	NA	NA	NA	3	3	NA
1099501	AWRI1608	NA	NA	NA	3	3	NA
1100501	AWRI1608	0.187027	0.187027	AHIQ01000029.1|2598	3.41525	3	NA
1101501	AWRI1608	0.263912	0.263912	AHIQ01000029.1|3598	3.60219	3	NA
1102501	AWRI1608	0.279978	0.279978	AHIQ01000029.1|4598	3.64253	3	4
1103501	AWRI1608	0.353979	0.353979	AHIQ01000029.1|5598	3.83424	3	4
1104501	AWRI1608	0.357535	0.357535	AHIQ01000029.1|6598	3.8437	3	4
1105501	AWRI1608	0.360705	0.360705	AHIQ01000029.1|7598	3.85216	3	4
1106501	AWRI1608	0.356451	0.356451	AHIQ01000029.1|8598	3.84082	3	4
1107501	AWRI1608	0.367677	0.367677	AHIQ01000029.1|9598	3.87082	3	4
1108501	AWRI1608	0.354581	0.354581	AHIQ01000029.1|10598	3.83584	3	4
1109501	AWRI1608	0.397768	0.397768	AHIQ01000029.1|11598	3.9524	3	4
1110501	AWRI1608	0.360614	0.360614	AHIQ01000029.1|12598	3.85192	3	4
1111501	AWRI1608	0.30685	0.30685	AHIQ01000029.1|13598	3.71101	3	4
1112501	AWRI1608	0.350879	0.350879	AHIQ01000029.1|14598	3.82601	3	4
1113501	AWRI1608	0.31731	0.31731	AHIQ01000029.1|15598	3.73801	3	4
1114501	AWRI1608	0.249396	0.249396	AHIQ01000029.1|16598	3.56613	3	4
1115501	AWRI1608	0.196369	0.196369	AHIQ01000029.1|17598	3.43743	3	4
1116501	AWRI1608	0.228254	0.228254	AHIQ01000029.1|18598	3.51425	3	4
1117501	AWRI1608	0.108584	0.108584	AHIQ01000029.1|19598	3.23451	3	3
1118501	AWRI1608	0.0663737	0.0663737	AHIQ01000029.1|20598	3.14124	3	3
1119501	AWRI1608	0.0539356	0.0539356	AHIQ01000029.1|21598	3.11428	3	3
1120501	AWRI1608	0.0349095	0.0349095	AHIQ01000029.1|22598	3.07348	3	3
1121501	AWRI1608	0.0145369	0.0145369	AHIQ01000029.1|23598	3.03038	3	3
1122501	AWRI1608	0.0172121	0.0172121	AHIQ01000029.1|24598	3.03601	3	NA
1123501	AWRI1608	0.029872	0.029872	AHIQ01000029.1|25598	3.06276	3	NA
1124501	AWRI1608	NA	NA	NA	3	3	NA
1125501	AWRI1608	NA	NA	NA	3	3	NA
1126501	AWRI1608	NA	NA	NA	3	3	NA
1127501	AWRI1608	NA	NA	NA	3	3	NA
1128501	AWRI1608	NA	NA	NA	3	3	NA
1129501	AWRI1608	NA	NA	NA	3	3	NA
1130501	AWRI1608	NA	NA	NA	3	3	NA
1131501	AWRI1608	NA	NA	NA	3	3	NA
1132501	AWRI1608	0.359433	0.359433	AHIQ01000031.1|2621	3.84876	3	NA
1133501	AWRI1608	0.305482	0.305482	AHIQ01000031.1|3621	3.70749	3	NA
1134501	AWRI1608	0.343355	0.343355	AHIQ01000031.1|4621	3.80611	3	4
1135501	AWRI1608	0.306287	0.306287	AHIQ01000031.1|5621	3.70956	3	4
1136501	AWRI1608	0.25208	0.25208	AHIQ01000031.1|6621	3.57277	3	4
1137501	AWRI1608	0.160996	0.160996	AHIQ01000031.1|7621	3.35418	3	4
1138501	AWRI1608	0.197833	0.197833	AHIQ01000031.1|8621	3.44092	3	4
1139501	AWRI1608	0.16	0.16	AHIQ01000031.1|9621	3.35186	3	4
1140501	AWRI1608	0.180795	0.180795	AHIQ01000031.1|10621	3.40053	3	4
1141501	AWRI1608	0.213845	0.213845	AHIQ01000031.1|11621	3.47933	3	4
1142501	AWRI1608	0.211234	0.211234	AHIQ01000031.1|12621	3.47303	3	4
1143501	AWRI1608	0.211605	0.211605	AHIQ01000031.1|13621	3.47393	3	4
1144501	AWRI1608	0.272561	0.272561	AHIQ01000031.1|14621	3.62385	3	4
1145501	AWRI1608	0.317321	0.317321	AHIQ01000031.1|15621	3.73804	3	NA
1146501	AWRI1608	0.281561	0.281561	AHIQ01000031.1|16621	3.64653	3	NA
1147501	AWRI1608	NA	NA	NA	3	3	NA
1148501	AWRI1608	NA	NA	NA	3	3	NA
1149501	AWRI1608	NA	NA	NA	3	3	NA
1150501	AWRI1608	NA	NA	NA	3	3	NA
1151501	AWRI1608	NA	NA	NA	3	3	NA
1152501	AWRI1608	0.0427995	0.0427995	AHIQ01000032.1|3387	3.09033	3	NA
1153501	AWRI1608	0.0643463	0.0643463	AHIQ01000032.1|4387	3.13683	3	NA
1154501	AWRI1608	-0.0270506	-0.0270506	AHIQ01000032.1|5387	2.94427	3	3
1155501	AWRI1608	-0.023019	-0.023019	AHIQ01000032.1|6387	2.95251	3	3
1156501	AWRI1608	-0.00256153	-0.00256153	AHIQ01000032.1|7387	2.99468	3	3
1157501	AWRI1608	0.0286532	0.0286532	AHIQ01000032.1|8387	3.06018	3	3
1158501	AWRI1608	0.0865433	0.0865433	AHIQ01000032.1|9387	3.18547	3	3
1159501	AWRI1608	0.155898	0.155898	AHIQ01000032.1|10387	3.34234	3	3
1160501	AWRI1608	0.182873	0.182873	AHIQ01000032.1|11387	3.40543	3	3
1161501	AWRI1608	0.250047	0.250047	AHIQ01000032.1|12387	3.56774	3	3
1162501	AWRI1608	0.201169	0.201169	AHIQ01000032.1|13387	3.44889	3	3
1163501	AWRI1608	0.0794376	0.0794376	AHIQ01000032.1|14387	3.16982	3	3
1164501	AWRI1608	-0.016041	-0.016041	AHIQ01000032.1|15387	2.96683	3	3
1165501	AWRI1608	-0.073766	-0.073766	AHIQ01000032.1|16387	2.85046	3	3
1166501	AWRI1608	-0.0876424	-0.0876424	AHIQ01000032.1|17387	2.82318	3	3
1167501	AWRI1608	-0.0463233	-0.0463233	AHIQ01000032.1|18387	2.9052	3	3
1168501	AWRI1608	-0.017313	-0.017313	AHIQ01000032.1|19387	2.96421	3	3
1169501	AWRI1608	0.0397798	0.0397798	AHIQ01000032.1|20387	3.08387	3	3
1170501	AWRI1608	0.100621	0.100621	AHIQ01000032.1|21387	3.2167	3	3
1171501	AWRI1608	0.140235	0.140235	AHIQ01000032.1|22387	3.30625	3	3
1172501	AWRI1608	0.138038	0.138038	AHIQ01000032.1|23387	3.30122	3	3
1173501	AWRI1608	0.184693	0.184693	AHIQ01000032.1|24387	3.40972	3	3
1174501	AWRI1608	0.189639	0.189639	AHIQ01000032.1|25387	3.42143	3	3
1175501	AWRI1608	0.211343	0.211343	AHIQ01000032.1|26387	3.4733	3	3
1176501	AWRI1608	0.204769	0.204769	AHIQ01000032.1|27387	3.4575	3	3
1177501	AWRI1608	0.213744	0.213744	AHIQ01000032.1|28387	3.47908	3	3
1178501	AWRI1608	0.191787	0.191787	AHIQ01000032.1|29387	3.42653	3	3
1179501	AWRI1608	0.144465	0.144465	AHIQ01000032.1|30387	3.31596	3	3
1180501	AWRI1608	0.142622	0.142622	AHIQ01000032.1|31387	3.31173	3	3
1181501	AWRI1608	0.165653	0.165653	AHIQ01000032.1|32387	3.36502	3	3
1182501	AWRI1608	0.168622	0.168622	AHIQ01000032.1|33387	3.37195	3	3
1183501	AWRI1608	0.156064	0.156064	AHIQ01000032.1|34387	3.34273	3	3
1184501	AWRI1608	0.181972	0.181972	AHIQ01000032.1|35387	3.4033	3	3
1185501	AWRI1608	0.133279	0.133279	AHIQ01000032.1|36387	3.29035	3	3
1186501	AWRI1608	0.0794933	0.0794933	AHIQ01000032.1|37387	3.16994	3	3
1187501	AWRI1608	0.0751462	0.0751462	AHIQ01000032.1|38387	3.1604	3	3
1188501	AWRI1608	0.0883866	0.0883866	AHIQ01000032.1|39387	3.18954	3	3
1189501	AWRI1608	0.0968956	0.0968956	AHIQ01000032.1|40387	3.20841	3	3
1190501	AWRI1608	0.074545	0.074545	AHIQ01000032.1|41387	3.15909	3	3
1191501	AWRI1608	0.0520041	0.0520041	AHIQ01000032.1|42387	3.11011	3	3
1192501	AWRI1608	0.0240298	0.0240298	AHIQ01000032.1|43387	3.05039	3	3
1193501	AWRI1608	0.0213004	0.0213004	AHIQ01000032.1|44387	3.04462	3	3
1194501	AWRI1608	0.00802504	0.00802504	AHIQ01000032.1|45387	3.01673	3	3
1195501	AWRI1608	-0.0119762	-0.0119762	AHIQ01000032.1|46387	2.9752	3	3
1196501	AWRI1608	0.00493611	0.00493611	AHIQ01000032.1|47387	3.01028	3	3
1197501	AWRI1608	-0.0174549	-0.0174549	AHIQ01000032.1|48387	2.96392	3	3
1198501	AWRI1608	-0.0214113	-0.0214113	AHIQ01000032.1|49387	2.95581	3	3
1199501	AWRI1608	-0.0127563	-0.0127563	AHIQ01000032.1|50387	2.97359	3	3
1200501	AWRI1608	-0.00433883	-0.00433883	AHIQ01000032.1|51387	2.99099	3	3
1201501	AWRI1608	-0.00847771	-0.00847771	AHIQ01000032.1|52387	2.98242	3	3
1202501	AWRI1608	0.0708247	0.0708247	AHIQ01000032.1|53387	3.15095	3	3
1203501	AWRI1608	0.15228	0.15228	AHIQ01000032.1|54387	3.33397	3	3
1204501	AWRI1608	0.205063	0.205063	AHIQ01000032.1|55387	3.45821	3	3
1205501	AWRI1608	0.284976	0.284976	AHIQ01000032.1|56387	3.65517	3	3
1206501	AWRI1608	0.257021	0.257021	AHIQ01000032.1|57387	3.58502	3	3
1207501	AWRI1608	0.185739	0.185739	AHIQ01000032.1|58387	3.4122	3	3
1208501	AWRI1608	0.137483	0.137483	AHIQ01000032.1|59387	3.29995	3	3
1209501	AWRI1608	0.041042	0.041042	AHIQ01000032.1|60387	3.08657	3	3
1210501	AWRI1608	-0.0707701	-0.0707701	AHIQ01000032.1|61387	2.85639	3	3
1211501	AWRI1608	-0.0680222	-0.0680222	AHIQ01000032.1|62387	2.86183	3	3
1212501	AWRI1608	0.036714	0.036714	AHIQ01000032.1|63387	3.07732	3	3
1213501	AWRI1608	0.0300625	0.0300625	AHIQ01000032.1|64387	3.06317	3	3
1214501	AWRI1608	0.09196	0.09196	AHIQ01000032.1|65387	3.19745	3	3
1215501	AWRI1608	0.150806	0.150806	AHIQ01000032.1|66387	3.33057	3	3
1216501	AWRI1608	0.149424	0.149424	AHIQ01000032.1|67387	3.32738	3	3
1217501	AWRI1608	0.068299	0.068299	AHIQ01000032.1|68387	3.14544	3	3
1218501	AWRI1608	-0.00321416	-0.00321416	AHIQ01000032.1|69387	2.99332	3	3
1219501	AWRI1608	-0.0499429	-0.0499429	AHIQ01000032.1|70387	2.89792	3	3
1220501	AWRI1608	-0.11218	-0.11218	AHIQ01000032.1|71387	2.77557	3	3
1221501	AWRI1608	-0.0618525	-0.0618525	AHIQ01000032.1|72387	2.8741	3	3
1222501	AWRI1608	-0.030964	-0.030964	AHIQ01000032.1|73387	2.9363	3	3
1223501	AWRI1608	0.0189854	0.0189854	AHIQ01000032.1|74387	3.03974	3	3
1224501	AWRI1608	0.0804133	0.0804133	AHIQ01000032.1|75387	3.17196	3	3
1225501	AWRI1608	0.126081	0.126081	AHIQ01000032.1|76387	3.27397	3	3
1226501	AWRI1608	0.135998	0.135998	AHIQ01000032.1|77387	3.29656	3	3
1227501	AWRI1608	0.118247	0.118247	AHIQ01000032.1|78387	3.25625	3	3
1228501	AWRI1608	0.145553	0.145553	AHIQ01000032.1|79387	3.31846	3	NA
1229501	AWRI1608	0.0117805	0.0117805	AHIQ01000032.1|80387	3.0246	3	NA
1230501	AWRI1608	NA	NA	NA	3	3	NA
1231501	AWRI1608	NA	NA	NA	3	3	NA
1232501	AWRI1608	NA	NA	NA	3	3	NA
1233501	AWRI1608	NA	NA	NA	3	3	NA
1234501	AWRI1608	NA	NA	NA	3	3	NA
1235501	AWRI1608	0.0707601	0.0707601	AHIQ01000033.1|2996	3.15081	3	NA
1236501	AWRI1608	0.112707	0.112707	AHIQ01000033.1|3996	3.24376	3	NA
1237501	AWRI1608	0.150573	0.150573	AHIQ01000033.1|4996	3.33003	3	3
1238501	AWRI1608	0.225455	0.225455	AHIQ01000033.1|5996	3.50744	3	3
1239501	AWRI1608	0.233361	0.233361	AHIQ01000033.1|6996	3.52671	3	3
1240501	AWRI1608	0.281442	0.281442	AHIQ01000033.1|7996	3.64623	3	3
1241501	AWRI1608	0.246627	0.246627	AHIQ01000033.1|8996	3.55929	3	3
1242501	AWRI1608	0.17058	0.17058	AHIQ01000033.1|9996	3.37653	3	3
1243501	AWRI1608	-0.0810678	-0.0810678	AHIQ01000033.1|10996	2.83607	3	3
1244501	AWRI1608	-0.204931	-0.204931	AHIQ01000033.1|11996	2.60274	3	3
1245501	AWRI1608	-0.245402	-0.245402	AHIQ01000033.1|12996	2.53074	3	3
1246501	AWRI1608	-0.201921	-0.201921	AHIQ01000033.1|13996	2.60818	3	3
1247501	AWRI1608	-0.328373	-0.328373	AHIQ01000033.1|14996	2.3893	3	3
1248501	AWRI1608	-0.29601	-0.29601	AHIQ01000033.1|15996	2.44351	3	3
1249501	AWRI1608	-0.353876	-0.353876	AHIQ01000033.1|16996	2.34744	3	2
1250501	AWRI1608	-0.482503	-0.482503	AHIQ01000033.1|17996	2.1472	3	2
1251501	AWRI1608	-0.489611	-0.489611	AHIQ01000033.1|18996	2.13665	3	2
1252501	AWRI1608	-0.382582	-0.382582	AHIQ01000033.1|19996	2.30119	3	2
1253501	AWRI1608	-0.297916	-0.297916	AHIQ01000033.1|20996	2.44028	3	2
1254501	AWRI1608	-0.0599841	-0.0599841	AHIQ01000033.1|21996	2.87782	3	2
1255501	AWRI1608	-0.084891	-0.084891	AHIQ01000033.1|22996	2.82857	3	3
1256501	AWRI1608	-0.20075	-0.20075	AHIQ01000033.1|23996	2.61029	3	3
1257501	AWRI1608	-0.266118	-0.266118	AHIQ01000033.1|24996	2.49466	3	3
1258501	AWRI1608	-0.256793	-0.256793	AHIQ01000033.1|25996	2.51084	3	3
1259501	AWRI1608	-0.289439	-0.289439	AHIQ01000033.1|26996	2.45466	3	3
1260501	AWRI1608	-0.113588	-0.113588	AHIQ01000033.1|27996	2.77286	3	3
1261501	AWRI1608	0.0464086	0.0464086	AHIQ01000033.1|28996	3.09807	3	3
1262501	AWRI1608	0.199575	0.199575	AHIQ01000033.1|29996	3.44508	3	3
1263501	AWRI1608	0.218416	0.218416	AHIQ01000033.1|30996	3.49037	3	3
1264501	AWRI1608	0.13164	0.13164	AHIQ01000033.1|31996	3.28662	3	3
1265501	AWRI1608	-0.043449	-0.043449	AHIQ01000033.1|32996	2.911	3	3
1266501	AWRI1608	-0.207086	-0.207086	AHIQ01000033.1|33996	2.59886	3	3
1267501	AWRI1608	-0.383449	-0.383449	AHIQ01000033.1|34996	2.29981	3	3
1268501	AWRI1608	-0.402233	-0.402233	AHIQ01000033.1|35996	2.27006	3	2
1269501	AWRI1608	-0.512567	-0.512567	AHIQ01000033.1|36996	2.10292	3	2
1270501	AWRI1608	-0.483559	-0.483559	AHIQ01000033.1|37996	2.14563	3	2
1271501	AWRI1608	-0.371252	-0.371252	AHIQ01000033.1|38996	2.31933	3	2
1272501	AWRI1608	-0.247098	-0.247098	AHIQ01000033.1|39996	2.52777	3	2
1273501	AWRI1608	-0.175087	-0.175087	AHIQ01000033.1|40996	2.65714	3	2
1274501	AWRI1608	-0.147706	-0.147706	AHIQ01000033.1|41996	2.70805	3	2
1275501	AWRI1608	-0.228839	-0.228839	AHIQ01000033.1|42996	2.55996	3	2
1276501	AWRI1608	-0.394103	-0.394103	AHIQ01000033.1|43996	2.28289	3	2
1277501	AWRI1608	-0.630249	-0.630249	AHIQ01000033.1|44996	1.93819	3	2
1278501	AWRI1608	-0.901709	-0.901709	AHIQ01000033.1|45996	1.60576	3	2
1279501	AWRI1608	-0.717424	-0.717424	AHIQ01000033.1|46996	1.82455	3	2
1280501	AWRI1608	-0.50009	-0.50009	AHIQ01000033.1|47996	2.12119	3	2
1281501	AWRI1608	-0.374057	-0.374057	AHIQ01000033.1|48996	2.31483	3	2
1282501	AWRI1608	-0.338707	-0.338707	AHIQ01000033.1|49996	2.37225	3	2
1283501	AWRI1608	-0.243907	-0.243907	AHIQ01000033.1|50996	2.53337	3	2
1284501	AWRI1608	-0.347825	-0.347825	AHIQ01000033.1|51996	2.3573	3	2
1285501	AWRI1608	-0.372674	-0.372674	AHIQ01000033.1|52996	2.31705	3	2
1286501	AWRI1608	-0.365151	-0.365151	AHIQ01000033.1|53996	2.32916	3	2
1287501	AWRI1608	-0.268639	-0.268639	AHIQ01000033.1|54996	2.49031	3	2
1288501	AWRI1608	-0.157828	-0.157828	AHIQ01000033.1|55996	2.68912	3	2
1289501	AWRI1608	-0.0960443	-0.0960443	AHIQ01000033.1|56996	2.80678	3	3
1290501	AWRI1608	-0.067695	-0.067695	AHIQ01000033.1|57996	2.86248	3	3
1291501	AWRI1608	-0.0649861	-0.0649861	AHIQ01000033.1|58996	2.86786	3	3
1292501	AWRI1608	-0.0767252	-0.0767252	AHIQ01000033.1|59996	2.84462	3	3
1293501	AWRI1608	-0.124982	-0.124982	AHIQ01000033.1|60996	2.75105	3	3
1294501	AWRI1608	-0.154602	-0.154602	AHIQ01000033.1|61996	2.69514	3	3
1295501	AWRI1608	-0.222476	-0.222476	AHIQ01000033.1|62996	2.57128	3	3
1296501	AWRI1608	-0.161096	-0.161096	AHIQ01000033.1|63996	2.68304	3	NA
1297501	AWRI1608	-0.253532	-0.253532	AHIQ01000033.1|64996	2.51652	3	NA
1298501	AWRI1608	NA	NA	NA	3	3	NA
1299501	AWRI1608	NA	NA	NA	3	3	NA
1300501	AWRI1608	NA	NA	NA	3	3	NA
1301501	AWRI1608	NA	NA	NA	3	3	NA
1302501	AWRI1608	NA	NA	NA	3	3	NA
1303501	AWRI1608	NA	NA	NA	3	3	NA
1304501	AWRI1608	NA	NA	NA	3	3	NA
1305501	AWRI1608	NA	NA	NA	3	3	NA
1306501	AWRI1608	NA	NA	NA	3	3	NA
1307501	AWRI1608	-0.290362	-0.290362	AHIQ01000035.1|2846	2.45309	3	NA
1308501	AWRI1608	-0.172296	-0.172296	AHIQ01000035.1|3846	2.66229	3	NA
1309501	AWRI1608	-0.00835032	-0.00835032	AHIQ01000035.1|4846	2.98269	3	3
1310501	AWRI1608	0.0344546	0.0344546	AHIQ01000035.1|5846	3.07251	3	3
1311501	AWRI1608	-0.0237775	-0.0237775	AHIQ01000035.1|6846	2.95096	3	3
1312501	AWRI1608	-0.159347	-0.159347	AHIQ01000035.1|7846	2.68629	3	3
1313501	AWRI1608	-0.16857	-0.16857	AHIQ01000035.1|8846	2.66917	3	3
1314501	AWRI1608	-0.17685	-0.17685	AHIQ01000035.1|9846	2.6539	3	3
1315501	AWRI1608	-0.166797	-0.166797	AHIQ01000035.1|10846	2.67245	3	3
1316501	AWRI1608	-0.134592	-0.134592	AHIQ01000035.1|11846	2.73278	3	3
1317501	AWRI1608	-0.112899	-0.112899	AHIQ01000035.1|12846	2.77418	3	3
1318501	AWRI1608	-0.100213	-0.100213	AHIQ01000035.1|13846	2.79869	3	3
1319501	AWRI1608	-0.0738517	-0.0738517	AHIQ01000035.1|14846	2.85029	3	NA
1320501	AWRI1608	-0.005251	-0.005251	AHIQ01000035.1|15846	2.9891	3	NA
1321501	AWRI1608	NA	NA	NA	3	3	NA
1322501	AWRI1608	NA	NA	NA	3	3	NA
1323501	AWRI1608	NA	NA	NA	3	3	NA
1324501	AWRI1608	NA	NA	NA	3	3	NA
1325501	AWRI1608	NA	NA	NA	3	3	NA
1326501	AWRI1608	0.043019	0.043019	AHIQ01000036.1|2757	3.0908	3	NA
1327501	AWRI1608	0.0539399	0.0539399	AHIQ01000036.1|3757	3.11429	3	NA
1328501	AWRI1608	0.0664816	0.0664816	AHIQ01000036.1|4757	3.14148	3	3
1329501	AWRI1608	0.0512141	0.0512141	AHIQ01000036.1|5757	3.10841	3	3
1330501	AWRI1608	0.0596625	0.0596625	AHIQ01000036.1|6757	3.12667	3	3
1331501	AWRI1608	0.0502666	0.0502666	AHIQ01000036.1|7757	3.10637	3	3
1332501	AWRI1608	0.147886	0.147886	AHIQ01000036.1|8757	3.32383	3	3
1333501	AWRI1608	0.106742	0.106742	AHIQ01000036.1|9757	3.23038	3	3
1334501	AWRI1608	0.121764	0.121764	AHIQ01000036.1|10757	3.26419	3	3
1335501	AWRI1608	0.1381	0.1381	AHIQ01000036.1|11757	3.30136	3	3
1336501	AWRI1608	0.0954527	0.0954527	AHIQ01000036.1|12757	3.2052	3	3
1337501	AWRI1608	0.00413352	0.00413352	AHIQ01000036.1|13757	3.00861	3	3
1338501	AWRI1608	0.0592285	0.0592285	AHIQ01000036.1|14757	3.12573	3	3
1339501	AWRI1608	0.0872801	0.0872801	AHIQ01000036.1|15757	3.1871	3	3
1340501	AWRI1608	0.110974	0.110974	AHIQ01000036.1|16757	3.23987	3	3
1341501	AWRI1608	0.218463	0.218463	AHIQ01000036.1|17757	3.49048	3	3
1342501	AWRI1608	0.199784	0.199784	AHIQ01000036.1|18757	3.44558	3	3
1343501	AWRI1608	0.178211	0.178211	AHIQ01000036.1|19757	3.39444	3	3
1344501	AWRI1608	0.162221	0.162221	AHIQ01000036.1|20757	3.35703	3	3
1345501	AWRI1608	0.167285	0.167285	AHIQ01000036.1|21757	3.36883	3	3
1346501	AWRI1608	0.135195	0.135195	AHIQ01000036.1|22757	3.29472	3	3
1347501	AWRI1608	0.209533	0.209533	AHIQ01000036.1|23757	3.46894	3	3
1348501	AWRI1608	0.212234	0.212234	AHIQ01000036.1|24757	3.47544	3	3
1349501	AWRI1608	0.189218	0.189218	AHIQ01000036.1|25757	3.42044	3	3
1350501	AWRI1608	0.189797	0.189797	AHIQ01000036.1|26757	3.42181	3	3
1351501	AWRI1608	0.202381	0.202381	AHIQ01000036.1|27757	3.45179	3	3
1352501	AWRI1608	0.146043	0.146043	AHIQ01000036.1|28757	3.31959	3	3
1353501	AWRI1608	0.243032	0.243032	AHIQ01000036.1|29757	3.55043	3	3
1354501	AWRI1608	0.224151	0.224151	AHIQ01000036.1|30757	3.50427	3	3
1355501	AWRI1608	0.226673	0.226673	AHIQ01000036.1|31757	3.5104	3	3
1356501	AWRI1608	0.215116	0.215116	AHIQ01000036.1|32757	3.48239	3	3
1357501	AWRI1608	0.22713	0.22713	AHIQ01000036.1|33757	3.51151	3	3
1358501	AWRI1608	0.157942	0.157942	AHIQ01000036.1|34757	3.34708	3	NA
1359501	AWRI1608	0.182893	0.182893	AHIQ01000036.1|35757	3.40547	3	NA
1360501	AWRI1608	NA	NA	NA	3	3	NA
1361501	AWRI1608	NA	NA	NA	3	3	NA
1362501	AWRI1608	NA	NA	NA	3	3	NA
1363501	AWRI1608	NA	NA	NA	3	3	NA
1364501	AWRI1608	NA	NA	NA	3	3	NA
1365501	AWRI1608	0.0584338	0.0584338	AHIQ01000037.1|2823	3.124	3	NA
1366501	AWRI1608	0.0101555	0.0101555	AHIQ01000037.1|3823	3.02119	3	NA
1367501	AWRI1608	-0.132246	-0.132246	AHIQ01000037.1|4823	2.73723	3	3
1368501	AWRI1608	-0.220625	-0.220625	AHIQ01000037.1|5823	2.57458	3	3
1369501	AWRI1608	-0.42596	-0.42596	AHIQ01000037.1|6823	2.23303	3	3
1370501	AWRI1608	-0.446777	-0.446777	AHIQ01000037.1|7823	2.20104	3	3
1371501	AWRI1608	-0.292305	-0.292305	AHIQ01000037.1|8823	2.44979	3	3
1372501	AWRI1608	-0.159711	-0.159711	AHIQ01000037.1|9823	2.68561	3	3
1373501	AWRI1608	-0.0384281	-0.0384281	AHIQ01000037.1|10823	2.92115	3	3
1374501	AWRI1608	0.0405672	0.0405672	AHIQ01000037.1|11823	3.08555	3	3
1375501	AWRI1608	-0.0893112	-0.0893112	AHIQ01000037.1|12823	2.81991	3	3
1376501	AWRI1608	-0.216625	-0.216625	AHIQ01000037.1|13823	2.58173	3	3
1377501	AWRI1608	-0.29137	-0.29137	AHIQ01000037.1|14823	2.45138	3	3
1378501	AWRI1608	-0.313508	-0.313508	AHIQ01000037.1|15823	2.41405	3	3
1379501	AWRI1608	-0.274213	-0.274213	AHIQ01000037.1|16823	2.4807	3	3
1380501	AWRI1608	-0.10985	-0.10985	AHIQ01000037.1|17823	2.78005	3	3
1381501	AWRI1608	-0.0202733	-0.0202733	AHIQ01000037.1|18823	2.95814	3	3
1382501	AWRI1608	0.0371946	0.0371946	AHIQ01000037.1|19823	3.07835	3	3
1383501	AWRI1608	0.0824524	0.0824524	AHIQ01000037.1|20823	3.17645	3	3
1384501	AWRI1608	0.140637	0.140637	AHIQ01000037.1|21823	3.30718	3	3
1385501	AWRI1608	0.128644	0.128644	AHIQ01000037.1|22823	3.2798	3	3
1386501	AWRI1608	0.161493	0.161493	AHIQ01000037.1|23823	3.35533	3	3
1387501	AWRI1608	0.183486	0.183486	AHIQ01000037.1|24823	3.40687	3	3
1388501	AWRI1608	0.201858	0.201858	AHIQ01000037.1|25823	3.45054	3	3
1389501	AWRI1608	0.149028	0.149028	AHIQ01000037.1|26823	3.32647	3	3
1390501	AWRI1608	0.216666	0.216666	AHIQ01000037.1|27823	3.48614	3	3
1391501	AWRI1608	0.204635	0.204635	AHIQ01000037.1|28823	3.45718	3	3
1392501	AWRI1608	0.204686	0.204686	AHIQ01000037.1|29823	3.45731	3	3
1393501	AWRI1608	0.148147	0.148147	AHIQ01000037.1|30823	3.32444	3	3
1394501	AWRI1608	0.192464	0.192464	AHIQ01000037.1|31823	3.42814	3	3
1395501	AWRI1608	0.144375	0.144375	AHIQ01000037.1|32823	3.31575	3	3
1396501	AWRI1608	0.107174	0.107174	AHIQ01000037.1|33823	3.23135	3	3
1397501	AWRI1608	0.0551942	0.0551942	AHIQ01000037.1|34823	3.117	3	3
1398501	AWRI1608	0.116621	0.116621	AHIQ01000037.1|35823	3.25258	3	3
1399501	AWRI1608	0.0483476	0.0483476	AHIQ01000037.1|36823	3.10224	3	3
1400501	AWRI1608	-0.020677	-0.020677	AHIQ01000037.1|37823	2.95731	3	3
1401501	AWRI1608	-0.057685	-0.057685	AHIQ01000037.1|38823	2.88241	3	3
1402501	AWRI1608	-0.0577603	-0.0577603	AHIQ01000037.1|39823	2.88226	3	3
1403501	AWRI1608	-0.123961	-0.123961	AHIQ01000037.1|40823	2.75299	3	3
1404501	AWRI1608	-0.0999559	-0.0999559	AHIQ01000037.1|41823	2.79918	3	3
1405501	AWRI1608	-0.0233775	-0.0233775	AHIQ01000037.1|42823	2.95178	3	3
1406501	AWRI1608	0.0081195	0.0081195	AHIQ01000037.1|43823	3.01693	3	3
1407501	AWRI1608	0.0868287	0.0868287	AHIQ01000037.1|44823	3.1861	3	3
1408501	AWRI1608	0.131942	0.131942	AHIQ01000037.1|45823	3.2873	3	3
1409501	AWRI1608	0.195726	0.195726	AHIQ01000037.1|46823	3.4359	3	3
1410501	AWRI1608	0.24464	0.24464	AHIQ01000037.1|47823	3.55439	3	3
1411501	AWRI1608	0.306378	0.306378	AHIQ01000037.1|48823	3.7098	3	3
1412501	AWRI1608	0.268894	0.268894	AHIQ01000037.1|49823	3.61465	3	3
1413501	AWRI1608	0.204361	0.204361	AHIQ01000037.1|50823	3.45653	3	3
1414501	AWRI1608	0.193955	0.193955	AHIQ01000037.1|51823	3.43169	3	3
1415501	AWRI1608	0.224035	0.224035	AHIQ01000037.1|52823	3.50399	3	3
1416501	AWRI1608	0.230622	0.230622	AHIQ01000037.1|53823	3.52002	3	3
1417501	AWRI1608	0.298147	0.298147	AHIQ01000037.1|54823	3.68869	3	4
1418501	AWRI1608	0.39528	0.39528	AHIQ01000037.1|55823	3.94559	3	4
1419501	AWRI1608	0.418164	0.418164	AHIQ01000037.1|56823	4.00868	3	4
1420501	AWRI1608	0.390978	0.390978	AHIQ01000037.1|57823	3.93385	3	4
1421501	AWRI1608	0.384035	0.384035	AHIQ01000037.1|58823	3.91496	3	4
1422501	AWRI1608	0.355786	0.355786	AHIQ01000037.1|59823	3.83905	3	4
1423501	AWRI1608	0.340693	0.340693	AHIQ01000037.1|60823	3.79909	3	4
1424501	AWRI1608	0.312761	0.312761	AHIQ01000037.1|61823	3.72625	3	4
1425501	AWRI1608	0.260853	0.260853	AHIQ01000037.1|62823	3.59456	3	4
1426501	AWRI1608	0.233761	0.233761	AHIQ01000037.1|63823	3.52769	3	4
1427501	AWRI1608	0.246425	0.246425	AHIQ01000037.1|64823	3.55879	3	4
1428501	AWRI1608	0.22994	0.22994	AHIQ01000037.1|65823	3.51836	3	4
1429501	AWRI1608	0.25926	0.25926	AHIQ01000037.1|66823	3.59059	3	4
1430501	AWRI1608	0.352616	0.352616	AHIQ01000037.1|67823	3.83062	3	4
1431501	AWRI1608	0.392292	0.392292	AHIQ01000037.1|68823	3.93743	3	4
1432501	AWRI1608	0.431949	0.431949	AHIQ01000037.1|69823	4.04716	3	4
1433501	AWRI1608	0.419987	0.419987	AHIQ01000037.1|70823	4.01375	3	4
1434501	AWRI1608	0.379286	0.379286	AHIQ01000037.1|71823	3.90209	3	4
1435501	AWRI1608	0.320613	0.320613	AHIQ01000037.1|72823	3.74658	3	4
1436501	AWRI1608	0.297849	0.297849	AHIQ01000037.1|73823	3.68793	3	4
1437501	AWRI1608	0.255062	0.255062	AHIQ01000037.1|74823	3.58016	3	4
1438501	AWRI1608	0.165685	0.165685	AHIQ01000037.1|75823	3.3651	3	4
1439501	AWRI1608	0.19859	0.19859	AHIQ01000037.1|76823	3.44273	3	4
1440501	AWRI1608	0.197261	0.197261	AHIQ01000037.1|77823	3.43956	3	4
1441501	AWRI1608	0.156352	0.156352	AHIQ01000037.1|78823	3.3434	3	4
1442501	AWRI1608	0.157723	0.157723	AHIQ01000037.1|79823	3.34658	3	4
1443501	AWRI1608	0.220941	0.220941	AHIQ01000037.1|80823	3.49648	3	3
1444501	AWRI1608	0.13608	0.13608	AHIQ01000037.1|81823	3.29675	3	3
1445501	AWRI1608	-0.140239	-0.140239	AHIQ01000037.1|82823	2.72211	3	3
1446501	AWRI1608	-0.385734	-0.385734	AHIQ01000037.1|83823	2.29617	3	3
1447501	AWRI1608	-0.756609	-0.756609	AHIQ01000037.1|84823	1.77566	3	2
1448501	AWRI1608	-0.63757	-0.63757	AHIQ01000037.1|85823	1.92838	3	2
1449501	AWRI1608	-0.561371	-0.561371	AHIQ01000037.1|86823	2.03297	3	2
1450501	AWRI1608	-0.311638	-0.311638	AHIQ01000037.1|87823	2.41718	3	2
1451501	AWRI1608	-0.0473278	-0.0473278	AHIQ01000037.1|88823	2.90318	3	3
1452501	AWRI1608	0.197281	0.197281	AHIQ01000037.1|89823	3.43961	3	3
1453501	AWRI1608	0.155118	0.155118	AHIQ01000037.1|90823	3.34054	3	3
1454501	AWRI1608	0.138975	0.138975	AHIQ01000037.1|91823	3.30337	3	3
1455501	AWRI1608	0.229056	0.229056	AHIQ01000037.1|92823	3.5162	3	3
1456501	AWRI1608	0.241957	0.241957	AHIQ01000037.1|93823	3.54779	3	3
1457501	AWRI1608	0.231216	0.231216	AHIQ01000037.1|94823	3.52147	3	3
1458501	AWRI1608	0.275942	0.275942	AHIQ01000037.1|95823	3.63235	3	3
1459501	AWRI1608	0.292334	0.292334	AHIQ01000037.1|96823	3.67386	3	3
1460501	AWRI1608	0.271246	0.271246	AHIQ01000037.1|97823	3.62055	3	3
1461501	AWRI1608	0.246738	0.246738	AHIQ01000037.1|98823	3.55956	3	3
1462501	AWRI1608	0.221535	0.221535	AHIQ01000037.1|99823	3.49792	3	3
1463501	AWRI1608	0.187289	0.187289	AHIQ01000037.1|100823	3.41587	3	3
1464501	AWRI1608	0.216218	0.216218	AHIQ01000037.1|101823	3.48505	3	3
1465501	AWRI1608	0.28452	0.28452	AHIQ01000037.1|102823	3.65401	3	3
1466501	AWRI1608	0.306503	0.306503	AHIQ01000037.1|103823	3.71012	3	3
1467501	AWRI1608	0.298441	0.298441	AHIQ01000037.1|104823	3.68944	3	3
1468501	AWRI1608	0.280217	0.280217	AHIQ01000037.1|105823	3.64313	3	3
1469501	AWRI1608	0.19915	0.19915	AHIQ01000037.1|106823	3.44406	3	3
1470501	AWRI1608	0.142397	0.142397	AHIQ01000037.1|107823	3.31121	3	3
1471501	AWRI1608	0.199461	0.199461	AHIQ01000037.1|108823	3.44481	3	3
1472501	AWRI1608	0.212409	0.212409	AHIQ01000037.1|109823	3.47586	3	3
1473501	AWRI1608	0.14489	0.14489	AHIQ01000037.1|110823	3.31694	3	3
1474501	AWRI1608	0.141195	0.141195	AHIQ01000037.1|111823	3.30846	3	3
1475501	AWRI1608	0.0495718	0.0495718	AHIQ01000037.1|112823	3.10487	3	3
1476501	AWRI1608	-0.132528	-0.132528	AHIQ01000037.1|113823	2.73669	3	3
1477501	AWRI1608	-0.245719	-0.245719	AHIQ01000037.1|114823	2.53019	3	3
1478501	AWRI1608	-0.155468	-0.155468	AHIQ01000037.1|115823	2.69352	3	3
1479501	AWRI1608	-0.0656013	-0.0656013	AHIQ01000037.1|116823	2.86664	3	3
1480501	AWRI1608	0.0457778	0.0457778	AHIQ01000037.1|117823	3.09672	3	3
1481501	AWRI1608	0.148543	0.148543	AHIQ01000037.1|118823	3.32535	3	3
1482501	AWRI1608	0.235237	0.235237	AHIQ01000037.1|119823	3.5313	3	3
1483501	AWRI1608	0.278387	0.278387	AHIQ01000037.1|120823	3.63851	3	3
1484501	AWRI1608	0.255108	0.255108	AHIQ01000037.1|121823	3.58027	3	3
1485501	AWRI1608	0.193793	0.193793	AHIQ01000037.1|122823	3.4313	3	3
1486501	AWRI1608	0.204667	0.204667	AHIQ01000037.1|123823	3.45726	3	3
1487501	AWRI1608	0.206126	0.206126	AHIQ01000037.1|124823	3.46076	3	3
1488501	AWRI1608	0.182215	0.182215	AHIQ01000037.1|125823	3.40387	3	3
1489501	AWRI1608	0.177852	0.177852	AHIQ01000037.1|126823	3.39359	3	3
1490501	AWRI1608	0.204549	0.204549	AHIQ01000037.1|127823	3.45698	3	3
1491501	AWRI1608	0.150313	0.150313	AHIQ01000037.1|128823	3.32943	3	3
1492501	AWRI1608	0.101161	0.101161	AHIQ01000037.1|129823	3.21791	3	3
1493501	AWRI1608	0.0817474	0.0817474	AHIQ01000037.1|130823	3.1749	3	3
1494501	AWRI1608	0.0640434	0.0640434	AHIQ01000037.1|131823	3.13617	3	3
1495501	AWRI1608	0.0394761	0.0394761	AHIQ01000037.1|132823	3.08322	3	3
1496501	AWRI1608	0.0498821	0.0498821	AHIQ01000037.1|133823	3.10554	3	3
1497501	AWRI1608	0.0886206	0.0886206	AHIQ01000037.1|134823	3.19006	3	3
1498501	AWRI1608	0.118222	0.118222	AHIQ01000037.1|135823	3.25619	3	3
1499501	AWRI1608	0.110274	0.110274	AHIQ01000037.1|136823	3.2383	3	3
1500501	AWRI1608	0.126976	0.126976	AHIQ01000037.1|137823	3.27601	3	3
1501501	AWRI1608	0.0940804	0.0940804	AHIQ01000037.1|138823	3.20215	3	3
1502501	AWRI1608	0.117834	0.117834	AHIQ01000037.1|139823	3.25531	3	3
1503501	AWRI1608	0.16231	0.16231	AHIQ01000037.1|140823	3.35723	3	3
1504501	AWRI1608	0.170086	0.170086	AHIQ01000037.1|141823	3.37538	3	3
1505501	AWRI1608	0.165576	0.165576	AHIQ01000037.1|142823	3.36484	3	3
1506501	AWRI1608	0.245071	0.245071	AHIQ01000037.1|143823	3.55545	3	3
1507501	AWRI1608	0.236378	0.236378	AHIQ01000037.1|144823	3.53409	3	3
1508501	AWRI1608	0.17329	0.17329	AHIQ01000037.1|145823	3.38288	3	3
1509501	AWRI1608	0.23388	0.23388	AHIQ01000037.1|146823	3.52798	3	3
1510501	AWRI1608	0.277876	0.277876	AHIQ01000037.1|147823	3.63723	3	3
1511501	AWRI1608	0.263791	0.263791	AHIQ01000037.1|148823	3.60189	3	3
1512501	AWRI1608	0.257437	0.257437	AHIQ01000037.1|149823	3.58606	3	3
1513501	AWRI1608	0.239032	0.239032	AHIQ01000037.1|150823	3.5406	3	3
1514501	AWRI1608	0.175599	0.175599	AHIQ01000037.1|151823	3.3883	3	3
1515501	AWRI1608	0.119726	0.119726	AHIQ01000037.1|152823	3.25958	3	4
1516501	AWRI1608	0.468206	0.468206	AHIQ01000037.1|153823	4.15016	3	NA
1517501	AWRI1608	0.671067	0.671067	AHIQ01000037.1|154823	4.77675	3	NA
1518501	AWRI1608	NA	NA	NA	3	3	NA
1519501	AWRI1608	NA	NA	NA	3	3	NA
1520501	AWRI1608	NA	NA	NA	3	3	NA
1521501	AWRI1608	NA	NA	NA	3	3	NA
1522501	AWRI1608	NA	NA	NA	3	3	NA
1523501	AWRI1608	-0.085414	-0.085414	AHIQ01000038.1|3099	2.82754	3	NA
1524501	AWRI1608	0.0121124	0.0121124	AHIQ01000038.1|4099	3.02529	3	NA
1525501	AWRI1608	NA	NA	NA	3	3	NA
1526501	AWRI1608	NA	NA	NA	3	3	NA
1527501	AWRI1608	NA	NA	NA	3	3	NA
1528501	AWRI1608	NA	NA	NA	3	3	NA
1529501	AWRI1608	NA	NA	NA	3	3	NA
1530501	AWRI1608	-0.10523	-0.10523	AHIQ01000039.1|2703	2.78897	3	NA
1531501	AWRI1608	-0.13576	-0.13576	AHIQ01000039.1|3703	2.73057	3	NA
1532501	AWRI1608	-0.225762	-0.225762	AHIQ01000039.1|4703	2.56543	3	3
1533501	AWRI1608	-0.292361	-0.292361	AHIQ01000039.1|5703	2.44969	3	3
1534501	AWRI1608	-0.229501	-0.229501	AHIQ01000039.1|6703	2.55879	3	3
1535501	AWRI1608	-0.137241	-0.137241	AHIQ01000039.1|7703	2.72777	3	3
1536501	AWRI1608	-0.0979843	-0.0979843	AHIQ01000039.1|8703	2.80301	3	3
1537501	AWRI1608	0.00611212	0.00611212	AHIQ01000039.1|9703	3.01274	3	3
1538501	AWRI1608	0.0831571	0.0831571	AHIQ01000039.1|10703	3.178	3	3
1539501	AWRI1608	0.0816876	0.0816876	AHIQ01000039.1|11703	3.17477	3	3
1540501	AWRI1608	0.0725678	0.0725678	AHIQ01000039.1|12703	3.15476	3	NA
1541501	AWRI1608	0.169487	0.169487	AHIQ01000039.1|13703	3.37397	3	NA
1542501	AWRI1608	NA	NA	NA	3	3	NA
1543501	AWRI1608	NA	NA	NA	3	3	NA
1544501	AWRI1608	NA	NA	NA	3	3	NA
1545501	AWRI1608	NA	NA	NA	3	3	NA
1546501	AWRI1608	NA	NA	NA	3	3	NA
1547501	AWRI1608	-0.155791	-0.155791	AHIQ01000040.1|2892	2.69292	3	NA
1548501	AWRI1608	-0.040613	-0.040613	AHIQ01000040.1|3892	2.91673	3	NA
1549501	AWRI1608	-0.13172	-0.13172	AHIQ01000040.1|4892	2.73823	3	3
1550501	AWRI1608	-0.261724	-0.261724	AHIQ01000040.1|5892	2.50227	3	3
1551501	AWRI1608	-0.27505	-0.27505	AHIQ01000040.1|6892	2.47927	3	3
1552501	AWRI1608	-0.282672	-0.282672	AHIQ01000040.1|7892	2.4662	3	3
1553501	AWRI1608	-0.190943	-0.190943	AHIQ01000040.1|8892	2.6281	3	3
1554501	AWRI1608	-0.190928	-0.190928	AHIQ01000040.1|9892	2.62813	3	3
1555501	AWRI1608	-0.181377	-0.181377	AHIQ01000040.1|10892	2.64558	3	3
1556501	AWRI1608	-0.192736	-0.192736	AHIQ01000040.1|11892	2.62483	3	3
1557501	AWRI1608	-0.166401	-0.166401	AHIQ01000040.1|12892	2.67319	3	3
1558501	AWRI1608	-0.166325	-0.166325	AHIQ01000040.1|13892	2.67333	3	3
1559501	AWRI1608	-0.122562	-0.122562	AHIQ01000040.1|14892	2.75567	3	3
1560501	AWRI1608	-0.0738089	-0.0738089	AHIQ01000040.1|15892	2.85038	3	3
1561501	AWRI1608	-0.151127	-0.151127	AHIQ01000040.1|16892	2.70164	3	3
1562501	AWRI1608	-0.151946	-0.151946	AHIQ01000040.1|17892	2.70011	3	3
1563501	AWRI1608	-0.282683	-0.282683	AHIQ01000040.1|18892	2.46618	3	NA
1564501	AWRI1608	-0.462284	-0.462284	AHIQ01000040.1|19892	2.17751	3	NA
1565501	AWRI1608	NA	NA	NA	3	3	NA
1566501	AWRI1608	NA	NA	NA	3	3	NA
1567501	AWRI1608	NA	NA	NA	3	3	NA
1568501	AWRI1608	NA	NA	NA	3	3	NA
1569501	AWRI1608	NA	NA	NA	3	3	NA
1570501	AWRI1608	-0.579357	-0.579357	AHIQ01000041.1|3045	2.00779	3	NA
1571501	AWRI1608	-0.644666	-0.644666	AHIQ01000041.1|4045	1.91892	3	NA
1572501	AWRI1608	-0.612811	-0.612811	AHIQ01000041.1|5045	1.96176	3	NA
1573501	AWRI1608	NA	NA	NA	3	3	NA
1574501	AWRI1608	NA	NA	NA	3	3	NA
1575501	AWRI1608	NA	NA	NA	3	3	NA
1576501	AWRI1608	NA	NA	NA	3	3	NA
1577501	AWRI1608	NA	NA	NA	3	3	NA
1578501	AWRI1608	-0.332873	-0.332873	AHIQ01000042.1|2687	2.38186	3	NA
1579501	AWRI1608	-0.355784	-0.355784	AHIQ01000042.1|3687	2.34433	3	NA
1580501	AWRI1608	-0.345691	-0.345691	AHIQ01000042.1|4687	2.36079	3	3
1581501	AWRI1608	-0.297038	-0.297038	AHIQ01000042.1|5687	2.44177	3	3
1582501	AWRI1608	-0.131136	-0.131136	AHIQ01000042.1|6687	2.73934	3	3
1583501	AWRI1608	-0.150369	-0.150369	AHIQ01000042.1|7687	2.70306	3	3
1584501	AWRI1608	-0.0995051	-0.0995051	AHIQ01000042.1|8687	2.80006	3	3
1585501	AWRI1608	-0.19224	-0.19224	AHIQ01000042.1|9687	2.62574	3	3
1586501	AWRI1608	-0.226508	-0.226508	AHIQ01000042.1|10687	2.5641	3	3
1587501	AWRI1608	-0.223822	-0.223822	AHIQ01000042.1|11687	2.56888	3	3
1588501	AWRI1608	-0.34263	-0.34263	AHIQ01000042.1|12687	2.36581	3	3
1589501	AWRI1608	-0.359296	-0.359296	AHIQ01000042.1|13687	2.33863	3	3
1590501	AWRI1608	-0.32633	-0.32633	AHIQ01000042.1|14687	2.39269	3	2
1591501	AWRI1608	-0.463806	-0.463806	AHIQ01000042.1|15687	2.17521	3	2
1592501	AWRI1608	-0.589354	-0.589354	AHIQ01000042.1|16687	1.99392	3	2
1593501	AWRI1608	-0.552302	-0.552302	AHIQ01000042.1|17687	2.04579	3	2
1594501	AWRI1608	-0.597796	-0.597796	AHIQ01000042.1|18687	1.98229	3	2
1595501	AWRI1608	-0.593593	-0.593593	AHIQ01000042.1|19687	1.98807	3	2
1596501	AWRI1608	-0.541373	-0.541373	AHIQ01000042.1|20687	2.06135	3	2
1597501	AWRI1608	-0.358681	-0.358681	AHIQ01000042.1|21687	2.33963	3	2
1598501	AWRI1608	-0.263151	-0.263151	AHIQ01000042.1|22687	2.4998	3	2
1599501	AWRI1608	-0.254897	-0.254897	AHIQ01000042.1|23687	2.51414	3	2
1600501	AWRI1608	-0.196142	-0.196142	AHIQ01000042.1|24687	2.61865	3	2
1601501	AWRI1608	-0.123685	-0.123685	AHIQ01000042.1|25687	2.75352	3	2
1602501	AWRI1608	-0.200828	-0.200828	AHIQ01000042.1|26687	2.61015	3	3
1603501	AWRI1608	-0.158868	-0.158868	AHIQ01000042.1|27687	2.68718	3	3
1604501	AWRI1608	-0.0959622	-0.0959622	AHIQ01000042.1|28687	2.80694	3	3
1605501	AWRI1608	-0.0873637	-0.0873637	AHIQ01000042.1|29687	2.82372	3	3
1606501	AWRI1608	-0.0618997	-0.0618997	AHIQ01000042.1|30687	2.87401	3	3
1607501	AWRI1608	-0.0564897	-0.0564897	AHIQ01000042.1|31687	2.8848	3	3
1608501	AWRI1608	-0.0465335	-0.0465335	AHIQ01000042.1|32687	2.90478	3	3
1609501	AWRI1608	-0.0186687	-0.0186687	AHIQ01000042.1|33687	2.96143	3	3
1610501	AWRI1608	-0.00504219	-0.00504219	AHIQ01000042.1|34687	2.98953	3	3
1611501	AWRI1608	0.0201679	0.0201679	AHIQ01000042.1|35687	3.04223	3	3
1612501	AWRI1608	0.0193559	0.0193559	AHIQ01000042.1|36687	3.04052	3	3
1613501	AWRI1608	0.0335534	0.0335534	AHIQ01000042.1|37687	3.07059	3	3
1614501	AWRI1608	-0.01147	-0.01147	AHIQ01000042.1|38687	2.97624	3	NA
1615501	AWRI1608	-0.206767	-0.206767	AHIQ01000042.1|39687	2.59943	3	NA
1616501	AWRI1608	NA	NA	NA	3	3	NA
1617501	AWRI1608	NA	NA	NA	3	3	NA
1618501	AWRI1608	NA	NA	NA	3	3	NA
1619501	AWRI1608	NA	NA	NA	3	3	NA
1620501	AWRI1608	NA	NA	NA	3	3	NA
1621501	AWRI1608	NA	NA	NA	3	3	NA
1622501	AWRI1608	NA	NA	NA	3	3	NA
1623501	AWRI1608	NA	NA	NA	3	3	NA
1624501	AWRI1608	NA	NA	NA	3	3	NA
1625501	AWRI1608	NA	NA	NA	3	3	NA
1626501	AWRI1608	-0.138471	-0.138471	AHIQ01000044.1|3191	2.72545	3	NA
1627501	AWRI1608	-0.119168	-0.119168	AHIQ01000044.1|4191	2.76216	3	NA
1628501	AWRI1608	-0.187921	-0.187921	AHIQ01000044.1|5191	2.63361	3	3
1629501	AWRI1608	-0.338021	-0.338021	AHIQ01000044.1|6191	2.37338	3	3
1630501	AWRI1608	-0.294733	-0.294733	AHIQ01000044.1|7191	2.44567	3	3
1631501	AWRI1608	-0.332263	-0.332263	AHIQ01000044.1|8191	2.38287	3	2
1632501	AWRI1608	-0.555489	-0.555489	AHIQ01000044.1|9191	2.04128	3	NA
1633501	AWRI1608	-0.855359	-0.855359	AHIQ01000044.1|10191	1.65818	3	NA
1634501	AWRI1608	NA	NA	NA	3	3	NA
1635501	AWRI1608	NA	NA	NA	3	3	NA
1636501	AWRI1608	NA	NA	NA	3	3	NA
1637501	AWRI1608	NA	NA	NA	3	3	NA
1638501	AWRI1608	NA	NA	NA	3	3	NA
1639501	AWRI1608	-0.555409	-0.555409	AHIQ01000045.1|3453	2.04139	3	NA
1640501	AWRI1608	-0.593224	-0.593224	AHIQ01000045.1|4453	1.98858	3	NA
1641501	AWRI1608	-0.68055	-0.68055	AHIQ01000045.1|5453	1.87178	3	2
1642501	AWRI1608	-0.606323	-0.606323	AHIQ01000045.1|6453	1.97061	3	2
1643501	AWRI1608	-0.435288	-0.435288	AHIQ01000045.1|7453	2.21864	3	2
1644501	AWRI1608	-0.349708	-0.349708	AHIQ01000045.1|8453	2.35423	3	2
1645501	AWRI1608	-0.355472	-0.355472	AHIQ01000045.1|9453	2.34484	3	2
1646501	AWRI1608	-0.317663	-0.317663	AHIQ01000045.1|10453	2.40711	3	NA
1647501	AWRI1608	-0.305683	-0.305683	AHIQ01000045.1|11453	2.42718	3	NA
1648501	AWRI1608	NA	NA	NA	3	3	NA
1649501	AWRI1608	NA	NA	NA	3	3	NA
1650501	AWRI1608	NA	NA	NA	3	3	NA
1651501	AWRI1608	NA	NA	NA	3	3	NA
1652501	AWRI1608	NA	NA	NA	3	3	NA
1653501	AWRI1608	-0.383225	-0.383225	AHIQ01000046.1|3156	2.30017	3	NA
1654501	AWRI1608	-0.417037	-0.417037	AHIQ01000046.1|4156	2.24688	3	NA
1655501	AWRI1608	-0.44347	-0.44347	AHIQ01000046.1|5156	2.20609	3	2
1656501	AWRI1608	-0.485369	-0.485369	AHIQ01000046.1|6156	2.14294	3	2
1657501	AWRI1608	-0.624631	-0.624631	AHIQ01000046.1|7156	1.94576	3	2
1658501	AWRI1608	-0.585351	-0.585351	AHIQ01000046.1|8156	1.99946	3	2
1659501	AWRI1608	-0.544991	-0.544991	AHIQ01000046.1|9156	2.05619	3	2
1660501	AWRI1608	-0.537442	-0.537442	AHIQ01000046.1|10156	2.06697	3	2
1661501	AWRI1608	-0.594453	-0.594453	AHIQ01000046.1|11156	1.98689	3	2
1662501	AWRI1608	-0.437742	-0.437742	AHIQ01000046.1|12156	2.21487	3	2
1663501	AWRI1608	-0.381427	-0.381427	AHIQ01000046.1|13156	2.30303	3	2
1664501	AWRI1608	-0.346179	-0.346179	AHIQ01000046.1|14156	2.35999	3	2
1665501	AWRI1608	-0.280539	-0.280539	AHIQ01000046.1|15156	2.46985	3	2
1666501	AWRI1608	-0.287036	-0.287036	AHIQ01000046.1|16156	2.45875	3	2
1667501	AWRI1608	-0.359511	-0.359511	AHIQ01000046.1|17156	2.33829	3	2
1668501	AWRI1608	-0.450653	-0.450653	AHIQ01000046.1|18156	2.19513	3	NA
1669501	AWRI1608	-0.665994	-0.665994	AHIQ01000046.1|19156	1.89076	3	NA
1670501	AWRI1608	NA	NA	NA	3	3	NA
1671501	AWRI1608	NA	NA	NA	3	3	NA
1672501	AWRI1608	NA	NA	NA	3	3	NA
1673501	AWRI1608	NA	NA	NA	3	3	NA
1674501	AWRI1608	NA	NA	NA	3	3	NA
1675501	AWRI1608	-0.537928	-0.537928	AHIQ01000047.1|2573	2.06628	3	NA
1676501	AWRI1608	-0.37655	-0.37655	AHIQ01000047.1|3573	2.31083	3	NA
1677501	AWRI1608	-0.302795	-0.302795	AHIQ01000047.1|4573	2.43204	3	2
1678501	AWRI1608	-0.301201	-0.301201	AHIQ01000047.1|5573	2.43473	3	2
1679501	AWRI1608	-0.402508	-0.402508	AHIQ01000047.1|6573	2.26963	3	2
1680501	AWRI1608	-0.524261	-0.524261	AHIQ01000047.1|7573	2.08595	3	NA
1681501	AWRI1608	-0.690983	-0.690983	AHIQ01000047.1|8573	1.85829	3	NA
1682501	AWRI1608	NA	NA	NA	3	3	NA
1683501	AWRI1608	NA	NA	NA	3	3	NA
1684501	AWRI1608	NA	NA	NA	3	3	NA
1685501	AWRI1608	NA	NA	NA	3	3	NA
1686501	AWRI1608	NA	NA	NA	3	3	NA
1687501	AWRI1608	-0.27825	-0.27825	AHIQ01000048.1|3365	2.47377	3	NA
1688501	AWRI1608	-0.260754	-0.260754	AHIQ01000048.1|4365	2.50395	3	NA
1689501	AWRI1608	-0.276808	-0.276808	AHIQ01000048.1|5365	2.47625	3	3
1690501	AWRI1608	-0.314402	-0.314402	AHIQ01000048.1|6365	2.41255	3	3
1691501	AWRI1608	-0.314813	-0.314813	AHIQ01000048.1|7365	2.41187	3	3
1692501	AWRI1608	-0.195126	-0.195126	AHIQ01000048.1|8365	2.62049	3	3
1693501	AWRI1608	-0.161759	-0.161759	AHIQ01000048.1|9365	2.6818	3	3
1694501	AWRI1608	-0.110226	-0.110226	AHIQ01000048.1|10365	2.77933	3	3
1695501	AWRI1608	-0.0587493	-0.0587493	AHIQ01000048.1|11365	2.88029	3	3
1696501	AWRI1608	-0.088628	-0.088628	AHIQ01000048.1|12365	2.82125	3	3
1697501	AWRI1608	-0.115307	-0.115307	AHIQ01000048.1|13365	2.76956	3	3
1698501	AWRI1608	-0.035157	-0.035157	AHIQ01000048.1|14365	2.92778	3	3
1699501	AWRI1608	0.00262183	0.00262183	AHIQ01000048.1|15365	3.00546	3	3
1700501	AWRI1608	0.0608295	0.0608295	AHIQ01000048.1|16365	3.1292	3	3
1701501	AWRI1608	0.126611	0.126611	AHIQ01000048.1|17365	3.27518	3	3
1702501	AWRI1608	0.194675	0.194675	AHIQ01000048.1|18365	3.4334	3	3
1703501	AWRI1608	0.203709	0.203709	AHIQ01000048.1|19365	3.45497	3	3
1704501	AWRI1608	0.192951	0.192951	AHIQ01000048.1|20365	3.4293	3	3
1705501	AWRI1608	0.116583	0.116583	AHIQ01000048.1|21365	3.25249	3	3
1706501	AWRI1608	0.0575909	0.0575909	AHIQ01000048.1|22365	3.12218	3	3
1707501	AWRI1608	-0.0437007	-0.0437007	AHIQ01000048.1|23365	2.91049	3	3
1708501	AWRI1608	-0.0546189	-0.0546189	AHIQ01000048.1|24365	2.88855	3	3
1709501	AWRI1608	-0.0761959	-0.0761959	AHIQ01000048.1|25365	2.84567	3	3
1710501	AWRI1608	-0.0220128	-0.0220128	AHIQ01000048.1|26365	2.95457	3	3
1711501	AWRI1608	0.0320413	0.0320413	AHIQ01000048.1|27365	3.06737	3	3
1712501	AWRI1608	0.0909624	0.0909624	AHIQ01000048.1|28365	3.19524	3	3
1713501	AWRI1608	0.113765	0.113765	AHIQ01000048.1|29365	3.24614	3	3
1714501	AWRI1608	0.1603	0.1603	AHIQ01000048.1|30365	3.35256	3	3
1715501	AWRI1608	0.167925	0.167925	AHIQ01000048.1|31365	3.37033	3	3
1716501	AWRI1608	0.0944109	0.0944109	AHIQ01000048.1|32365	3.20289	3	3
1717501	AWRI1608	0.0652458	0.0652458	AHIQ01000048.1|33365	3.13879	3	3
1718501	AWRI1608	-0.000537533	-0.000537533	AHIQ01000048.1|34365	2.99888	3	NA
1719501	AWRI1608	-0.0460804	-0.0460804	AHIQ01000048.1|35365	2.90569	3	NA
1720501	AWRI1608	NA	NA	NA	3	3	NA
1721501	AWRI1608	NA	NA	NA	3	3	NA
1722501	AWRI1608	NA	NA	NA	3	3	NA
1723501	AWRI1608	NA	NA	NA	3	3	NA
1724501	AWRI1608	NA	NA	NA	3	3	NA
1725501	AWRI1608	-0.297293	-0.297293	AHIQ01000049.1|3087	2.44133	3	NA
1726501	AWRI1608	-0.352339	-0.352339	AHIQ01000049.1|4087	2.34994	3	NA
1727501	AWRI1608	-0.287356	-0.287356	AHIQ01000049.1|5087	2.45821	3	3
1728501	AWRI1608	-0.248376	-0.248376	AHIQ01000049.1|6087	2.52553	3	3
1729501	AWRI1608	-0.200532	-0.200532	AHIQ01000049.1|7087	2.61069	3	3
1730501	AWRI1608	-0.129715	-0.129715	AHIQ01000049.1|8087	2.74204	3	3
1731501	AWRI1608	-0.137784	-0.137784	AHIQ01000049.1|9087	2.72674	3	3
1732501	AWRI1608	-0.193413	-0.193413	AHIQ01000049.1|10087	2.6236	3	3
1733501	AWRI1608	-0.321733	-0.321733	AHIQ01000049.1|11087	2.40032	3	3
1734501	AWRI1608	-0.291663	-0.291663	AHIQ01000049.1|12087	2.45088	3	3
1735501	AWRI1608	-0.30071	-0.30071	AHIQ01000049.1|13087	2.43556	3	3
1736501	AWRI1608	-0.182885	-0.182885	AHIQ01000049.1|14087	2.64282	3	3
1737501	AWRI1608	-0.0836059	-0.0836059	AHIQ01000049.1|15087	2.83109	3	3
1738501	AWRI1608	0.0577082	0.0577082	AHIQ01000049.1|16087	3.12243	3	3
1739501	AWRI1608	0.0843393	0.0843393	AHIQ01000049.1|17087	3.18061	3	3
1740501	AWRI1608	0.148812	0.148812	AHIQ01000049.1|18087	3.32597	3	3
1741501	AWRI1608	0.0778186	0.0778186	AHIQ01000049.1|19087	3.16626	3	3
1742501	AWRI1608	0.0167338	0.0167338	AHIQ01000049.1|20087	3.035	3	3
1743501	AWRI1608	-0.147145	-0.147145	AHIQ01000049.1|21087	2.70911	3	3
1744501	AWRI1608	-0.198366	-0.198366	AHIQ01000049.1|22087	2.61461	3	3
1745501	AWRI1608	-0.449875	-0.449875	AHIQ01000049.1|23087	2.19632	3	3
1746501	AWRI1608	-0.486617	-0.486617	AHIQ01000049.1|24087	2.14109	3	2
1747501	AWRI1608	-0.424133	-0.424133	AHIQ01000049.1|25087	2.23586	3	2
1748501	AWRI1608	-0.253252	-0.253252	AHIQ01000049.1|26087	2.51701	3	2
1749501	AWRI1608	-0.164413	-0.164413	AHIQ01000049.1|27087	2.67688	3	3
1750501	AWRI1608	0.0809608	0.0809608	AHIQ01000049.1|28087	3.17317	3	3
1751501	AWRI1608	0.101068	0.101068	AHIQ01000049.1|29087	3.2177	3	3
1752501	AWRI1608	0.128743	0.128743	AHIQ01000049.1|30087	3.28002	3	3
1753501	AWRI1608	0.110111	0.110111	AHIQ01000049.1|31087	3.23793	3	3
1754501	AWRI1608	0.114416	0.114416	AHIQ01000049.1|32087	3.24761	3	NA
1755501	AWRI1608	0.0037456	0.0037456	AHIQ01000049.1|33087	3.0078	3	NA
1756501	AWRI1608	NA	NA	NA	3	3	NA
1757501	AWRI1608	NA	NA	NA	3	3	NA
1758501	AWRI1608	NA	NA	NA	3	3	NA
1759501	AWRI1608	NA	NA	NA	3	3	NA
1760501	AWRI1608	NA	NA	NA	3	3	NA
1761501	AWRI1608	0.114325	0.114325	AHIQ01000050.1|2948	3.2474	3	NA
1762501	AWRI1608	0.14365	0.14365	AHIQ01000050.1|3948	3.31409	3	NA
1763501	AWRI1608	0.136656	0.136656	AHIQ01000050.1|4948	3.29806	3	3
1764501	AWRI1608	0.135928	0.135928	AHIQ01000050.1|5948	3.2964	3	3
1765501	AWRI1608	0.116366	0.116366	AHIQ01000050.1|6948	3.252	3	3
1766501	AWRI1608	0.114295	0.114295	AHIQ01000050.1|7948	3.24734	3	3
1767501	AWRI1608	0.0904867	0.0904867	AHIQ01000050.1|8948	3.19419	3	3
1768501	AWRI1608	0.0817559	0.0817559	AHIQ01000050.1|9948	3.17492	3	3
1769501	AWRI1608	0.00715217	0.00715217	AHIQ01000050.1|10948	3.01491	3	3
1770501	AWRI1608	-0.0129069	-0.0129069	AHIQ01000050.1|11948	2.97328	3	3
1771501	AWRI1608	-0.0809578	-0.0809578	AHIQ01000050.1|12948	2.83629	3	3
1772501	AWRI1608	-0.12269	-0.12269	AHIQ01000050.1|13948	2.75542	3	3
1773501	AWRI1608	-0.17429	-0.17429	AHIQ01000050.1|14948	2.65861	3	3
1774501	AWRI1608	-0.149506	-0.149506	AHIQ01000050.1|15948	2.70468	3	3
1775501	AWRI1608	-0.096112	-0.096112	AHIQ01000050.1|16948	2.80665	3	3
1776501	AWRI1608	-0.100586	-0.100586	AHIQ01000050.1|17948	2.79796	3	3
1777501	AWRI1608	-0.0100072	-0.0100072	AHIQ01000050.1|18948	2.97926	3	3
1778501	AWRI1608	0.0965276	0.0965276	AHIQ01000050.1|19948	3.20759	3	3
1779501	AWRI1608	0.0448398	0.0448398	AHIQ01000050.1|20948	3.09471	3	3
1780501	AWRI1608	-0.0176976	-0.0176976	AHIQ01000050.1|21948	2.96342	3	3
1781501	AWRI1608	-0.0646455	-0.0646455	AHIQ01000050.1|22948	2.86854	3	3
1782501	AWRI1608	-0.19806	-0.19806	AHIQ01000050.1|23948	2.61517	3	3
1783501	AWRI1608	-0.262109	-0.262109	AHIQ01000050.1|24948	2.5016	3	3
1784501	AWRI1608	-0.256517	-0.256517	AHIQ01000050.1|25948	2.51132	3	3
1785501	AWRI1608	-0.415058	-0.415058	AHIQ01000050.1|26948	2.24997	3	2
1786501	AWRI1608	-0.414805	-0.414805	AHIQ01000050.1|27948	2.25036	3	2
1787501	AWRI1608	-0.456122	-0.456122	AHIQ01000050.1|28948	2.18683	3	2
1788501	AWRI1608	-0.62734	-0.62734	AHIQ01000050.1|29948	1.94211	3	2
1789501	AWRI1608	-0.596462	-0.596462	AHIQ01000050.1|30948	1.98412	3	2
1790501	AWRI1608	-0.416271	-0.416271	AHIQ01000050.1|31948	2.24808	3	2
1791501	AWRI1608	-0.436053	-0.436053	AHIQ01000050.1|32948	2.21746	3	2
1792501	AWRI1608	-0.3504	-0.3504	AHIQ01000050.1|33948	2.3531	3	2
1793501	AWRI1608	-0.291209	-0.291209	AHIQ01000050.1|34948	2.45165	3	2
1794501	AWRI1608	-0.347525	-0.347525	AHIQ01000050.1|35948	2.35779	3	2
1795501	AWRI1608	-0.454082	-0.454082	AHIQ01000050.1|36948	2.18992	3	2
1796501	AWRI1608	-0.600256	-0.600256	AHIQ01000050.1|37948	1.97891	3	2
1797501	AWRI1608	-0.671041	-0.671041	AHIQ01000050.1|38948	1.88416	3	2
1798501	AWRI1608	-0.688474	-0.688474	AHIQ01000050.1|39948	1.86153	3	2
1799501	AWRI1608	-0.746056	-0.746056	AHIQ01000050.1|40948	1.78869	3	2
1800501	AWRI1608	-0.751018	-0.751018	AHIQ01000050.1|41948	1.78255	3	2
1801501	AWRI1608	-0.606427	-0.606427	AHIQ01000050.1|42948	1.97046	3	2
1802501	AWRI1608	-0.669141	-0.669141	AHIQ01000050.1|43948	1.88664	3	2
1803501	AWRI1608	-0.703981	-0.703981	AHIQ01000050.1|44948	1.84163	3	2
1804501	AWRI1608	-0.667344	-0.667344	AHIQ01000050.1|45948	1.88899	3	2
1805501	AWRI1608	-0.651002	-0.651002	AHIQ01000050.1|46948	1.91051	3	2
1806501	AWRI1608	-0.761738	-0.761738	AHIQ01000050.1|47948	1.76936	3	2
1807501	AWRI1608	-0.666124	-0.666124	AHIQ01000050.1|48948	1.89059	3	2
1808501	AWRI1608	-0.543441	-0.543441	AHIQ01000050.1|49948	2.0584	3	2
1809501	AWRI1608	-0.434817	-0.434817	AHIQ01000050.1|50948	2.21936	3	2
1810501	AWRI1608	-0.358026	-0.358026	AHIQ01000050.1|51948	2.34069	3	2
1811501	AWRI1608	-0.334657	-0.334657	AHIQ01000050.1|52948	2.37892	3	2
1812501	AWRI1608	-0.365693	-0.365693	AHIQ01000050.1|53948	2.32829	3	2
1813501	AWRI1608	-0.460304	-0.460304	AHIQ01000050.1|54948	2.1805	3	NA
1814501	AWRI1608	-0.512012	-0.512012	AHIQ01000050.1|55948	2.10373	3	NA
1815501	AWRI1608	NA	NA	NA	3	3	NA
1816501	AWRI1608	NA	NA	NA	3	3	NA
1817501	AWRI1608	NA	NA	NA	3	3	NA
1818501	AWRI1608	NA	NA	NA	3	3	NA
1819501	AWRI1608	NA	NA	NA	3	3	NA
1820501	AWRI1608	NA	NA	NA	3	3	NA
1821501	AWRI1608	NA	NA	NA	3	3	NA
1822501	AWRI1608	-0.0451934	-0.0451934	AHIQ01000052.1|2651	2.90748	3	NA
1823501	AWRI1608	0.0215856	0.0215856	AHIQ01000052.1|3651	3.04522	3	NA
1824501	AWRI1608	0.07799	0.07799	AHIQ01000052.1|4651	3.16664	3	3
1825501	AWRI1608	0.0707644	0.0707644	AHIQ01000052.1|5651	3.15082	3	3
1826501	AWRI1608	0.0729204	0.0729204	AHIQ01000052.1|6651	3.15553	3	3
1827501	AWRI1608	0.160935	0.160935	AHIQ01000052.1|7651	3.35403	3	3
1828501	AWRI1608	0.112292	0.112292	AHIQ01000052.1|8651	3.24283	3	3
1829501	AWRI1608	0.104383	0.104383	AHIQ01000052.1|9651	3.2251	3	3
1830501	AWRI1608	0.0275442	0.0275442	AHIQ01000052.1|10651	3.05783	3	3
1831501	AWRI1608	-0.00281076	-0.00281076	AHIQ01000052.1|11651	2.99416	3	3
1832501	AWRI1608	-0.126008	-0.126008	AHIQ01000052.1|12651	2.74909	3	3
1833501	AWRI1608	-0.208266	-0.208266	AHIQ01000052.1|13651	2.59673	3	3
1834501	AWRI1608	-0.243484	-0.243484	AHIQ01000052.1|14651	2.53411	3	3
1835501	AWRI1608	-0.212756	-0.212756	AHIQ01000052.1|15651	2.58866	3	3
1836501	AWRI1608	-0.218955	-0.218955	AHIQ01000052.1|16651	2.57756	3	3
1837501	AWRI1608	-0.240847	-0.240847	AHIQ01000052.1|17651	2.53875	3	3
1838501	AWRI1608	-0.189596	-0.189596	AHIQ01000052.1|18651	2.63055	3	3
1839501	AWRI1608	-0.150625	-0.150625	AHIQ01000052.1|19651	2.70258	3	3
1840501	AWRI1608	-0.18635	-0.18635	AHIQ01000052.1|20651	2.63648	3	3
1841501	AWRI1608	-0.267108	-0.267108	AHIQ01000052.1|21651	2.49295	3	NA
1842501	AWRI1608	-0.281863	-0.281863	AHIQ01000052.1|22651	2.46758	3	NA
1843501	AWRI1608	NA	NA	NA	3	3	NA
1844501	AWRI1608	NA	NA	NA	3	3	NA
1845501	AWRI1608	NA	NA	NA	3	3	NA
1846501	AWRI1608	NA	NA	NA	3	3	NA
1847501	AWRI1608	NA	NA	NA	3	3	NA
1848501	AWRI1608	-1.10342	-1.10342	AHIQ01000053.1|2708	1.39624	3	NA
1849501	AWRI1608	-1.12483	-1.12483	AHIQ01000053.1|3708	1.37567	3	NA
1850501	AWRI1608	-0.782276	-0.782276	AHIQ01000053.1|4708	1.74435	3	2
1851501	AWRI1608	-0.485806	-0.485806	AHIQ01000053.1|5708	2.14229	3	2
1852501	AWRI1608	-0.539735	-0.539735	AHIQ01000053.1|6708	2.06369	3	2
1853501	AWRI1608	-0.60285	-0.60285	AHIQ01000053.1|7708	1.97536	3	2
1854501	AWRI1608	-0.524443	-0.524443	AHIQ01000053.1|8708	2.08568	3	2
1855501	AWRI1608	-0.538217	-0.538217	AHIQ01000053.1|9708	2.06586	3	2
1856501	AWRI1608	-0.383124	-0.383124	AHIQ01000053.1|10708	2.30033	3	2
1857501	AWRI1608	-0.251802	-0.251802	AHIQ01000053.1|11708	2.51954	3	2
1858501	AWRI1608	-0.247484	-0.247484	AHIQ01000053.1|12708	2.52709	3	2
1859501	AWRI1608	-0.24916	-0.24916	AHIQ01000053.1|13708	2.52416	3	2
1860501	AWRI1608	-0.276052	-0.276052	AHIQ01000053.1|14708	2.47754	3	2
1861501	AWRI1608	-0.496493	-0.496493	AHIQ01000053.1|15708	2.12648	3	2
1862501	AWRI1608	-0.632253	-0.632253	AHIQ01000053.1|16708	1.9355	3	2
1863501	AWRI1608	-0.725284	-0.725284	AHIQ01000053.1|17708	1.81463	3	2
1864501	AWRI1608	-0.794541	-0.794541	AHIQ01000053.1|18708	1.72958	3	NA
1865501	AWRI1608	-0.773613	-0.773613	AHIQ01000053.1|19708	1.75485	3	NA
1866501	AWRI1608	NA	NA	NA	3	3	NA
1867501	AWRI1608	NA	NA	NA	3	3	NA
1868501	AWRI1608	NA	NA	NA	3	3	NA
1869501	AWRI1608	NA	NA	NA	3	3	NA
1870501	AWRI1608	NA	NA	NA	3	3	NA
1871501	AWRI1608	NA	NA	NA	3	3	NA
1872501	AWRI1608	NA	NA	NA	3	3	NA
1873501	AWRI1608	NA	NA	NA	3	3	NA
1874501	AWRI1608	-0.865592	-0.865592	AHIQ01000055.1|3020	1.64646	3	NA
1875501	AWRI1608	-0.692181	-0.692181	AHIQ01000055.1|4020	1.85675	3	NA
1876501	AWRI1608	-0.480186	-0.480186	AHIQ01000055.1|5020	2.15066	3	2
1877501	AWRI1608	-0.339702	-0.339702	AHIQ01000055.1|6020	2.37061	3	2
1878501	AWRI1608	-0.103839	-0.103839	AHIQ01000055.1|7020	2.79166	3	2
1879501	AWRI1608	-0.11769	-0.11769	AHIQ01000055.1|8020	2.76499	3	3
1880501	AWRI1608	-0.107216	-0.107216	AHIQ01000055.1|9020	2.78513	3	3
1881501	AWRI1608	-0.215411	-0.215411	AHIQ01000055.1|10020	2.5839	3	3
1882501	AWRI1608	-0.272447	-0.272447	AHIQ01000055.1|11020	2.48374	3	3
1883501	AWRI1608	-0.252918	-0.252918	AHIQ01000055.1|12020	2.51759	3	3
1884501	AWRI1608	-0.224277	-0.224277	AHIQ01000055.1|13020	2.56807	3	3
1885501	AWRI1608	-0.228017	-0.228017	AHIQ01000055.1|14020	2.56142	3	3
1886501	AWRI1608	-0.141291	-0.141291	AHIQ01000055.1|15020	2.72012	3	3
1887501	AWRI1608	-0.059904	-0.059904	AHIQ01000055.1|16020	2.87798	3	3
1888501	AWRI1608	-0.0293337	-0.0293337	AHIQ01000055.1|17020	2.93962	3	3
1889501	AWRI1608	-0.0528536	-0.0528536	AHIQ01000055.1|18020	2.89208	3	3
1890501	AWRI1608	-0.0747375	-0.0747375	AHIQ01000055.1|19020	2.84854	3	3
1891501	AWRI1608	-0.12235	-0.12235	AHIQ01000055.1|20020	2.75607	3	3
1892501	AWRI1608	-0.155408	-0.155408	AHIQ01000055.1|21020	2.69364	3	3
1893501	AWRI1608	-0.223046	-0.223046	AHIQ01000055.1|22020	2.57026	3	NA
1894501	AWRI1608	-0.365367	-0.365367	AHIQ01000055.1|23020	2.32881	3	NA
1895501	AWRI1608	NA	NA	NA	3	3	NA
1896501	AWRI1608	NA	NA	NA	3	3	NA
1897501	AWRI1608	NA	NA	NA	3	3	NA
1898501	AWRI1608	NA	NA	NA	3	3	NA
1899501	AWRI1608	NA	NA	NA	3	3	NA
1900501	AWRI1608	-0.975886	-0.975886	AHIQ01000056.1|2805	1.52528	3	NA
1901501	AWRI1608	-0.634407	-0.634407	AHIQ01000056.1|3805	1.93262	3	NA
1902501	AWRI1608	-0.413635	-0.413635	AHIQ01000056.1|4805	2.25219	3	2
1903501	AWRI1608	-0.32097	-0.32097	AHIQ01000056.1|5805	2.40159	3	2
1904501	AWRI1608	-0.215763	-0.215763	AHIQ01000056.1|6805	2.58327	3	2
1905501	AWRI1608	-0.251328	-0.251328	AHIQ01000056.1|7805	2.52037	3	2
1906501	AWRI1608	-0.34067	-0.34067	AHIQ01000056.1|8805	2.36902	3	2
1907501	AWRI1608	-0.419891	-0.419891	AHIQ01000056.1|9805	2.24244	3	2
1908501	AWRI1608	-0.42375	-0.42375	AHIQ01000056.1|10805	2.23645	3	2
1909501	AWRI1608	-0.347381	-0.347381	AHIQ01000056.1|11805	2.35803	3	2
1910501	AWRI1608	-0.387621	-0.387621	AHIQ01000056.1|12805	2.29317	3	2
1911501	AWRI1608	-0.392807	-0.392807	AHIQ01000056.1|13805	2.28494	3	2
1912501	AWRI1608	-0.402155	-0.402155	AHIQ01000056.1|14805	2.27018	3	NA
1913501	AWRI1608	-0.486807	-0.486807	AHIQ01000056.1|15805	2.14081	3	NA
1914501	AWRI1608	NA	NA	NA	3	3	NA
1915501	AWRI1608	NA	NA	NA	3	3	NA
1916501	AWRI1608	NA	NA	NA	3	3	NA
1917501	AWRI1608	NA	NA	NA	3	3	NA
1918501	AWRI1608	NA	NA	NA	3	3	NA
1919501	AWRI1608	-1.43509	-1.43509	AHIQ01000057.1|2744	1.10947	3	NA
1920501	AWRI1608	-0.989544	-0.989544	AHIQ01000057.1|3744	1.51091	3	NA
1921501	AWRI1608	-0.911086	-0.911086	AHIQ01000057.1|4744	1.59535	3	2
1922501	AWRI1608	-0.671229	-0.671229	AHIQ01000057.1|5744	1.88392	3	2
1923501	AWRI1608	-0.575948	-0.575948	AHIQ01000057.1|6744	2.01254	3	2
1924501	AWRI1608	-0.435184	-0.435184	AHIQ01000057.1|7744	2.2188	3	2
1925501	AWRI1608	-0.374104	-0.374104	AHIQ01000057.1|8744	2.31475	3	2
1926501	AWRI1608	-0.289981	-0.289981	AHIQ01000057.1|9744	2.45374	3	2
1927501	AWRI1608	-0.236918	-0.236918	AHIQ01000057.1|10744	2.54567	3	2
1928501	AWRI1608	-0.285922	-0.285922	AHIQ01000057.1|11744	2.46065	3	2
1929501	AWRI1608	-0.26932	-0.26932	AHIQ01000057.1|12744	2.48913	3	2
1930501	AWRI1608	-0.450789	-0.450789	AHIQ01000057.1|13744	2.19493	3	2
1931501	AWRI1608	-0.511541	-0.511541	AHIQ01000057.1|14744	2.10442	3	2
1932501	AWRI1608	-0.741345	-0.741345	AHIQ01000057.1|15744	1.79454	3	2
1933501	AWRI1608	-0.624108	-0.624108	AHIQ01000057.1|16744	1.94646	3	2
1934501	AWRI1608	-0.734691	-0.734691	AHIQ01000057.1|17744	1.80284	3	2
1935501	AWRI1608	-0.586491	-0.586491	AHIQ01000057.1|18744	1.99788	3	2
1936501	AWRI1608	-0.603798	-0.603798	AHIQ01000057.1|19744	1.97406	3	2
1937501	AWRI1608	-0.599461	-0.599461	AHIQ01000057.1|20744	1.98	3	2
1938501	AWRI1608	-0.703001	-0.703001	AHIQ01000057.1|21744	1.84288	3	2
1939501	AWRI1608	-0.682211	-0.682211	AHIQ01000057.1|22744	1.86963	3	2
1940501	AWRI1608	-0.700757	-0.700757	AHIQ01000057.1|23744	1.84575	3	NA
1941501	AWRI1608	-0.77287	-0.77287	AHIQ01000057.1|24744	1.75576	3	NA
1942501	AWRI1608	NA	NA	NA	3	3	NA
1943501	AWRI1608	NA	NA	NA	3	3	NA
1944501	AWRI1608	NA	NA	NA	3	3	NA
1945501	AWRI1608	NA	NA	NA	3	3	NA
1946501	AWRI1608	NA	NA	NA	3	3	NA
1947501	AWRI1608	0.324794	0.324794	AHIQ01000058.1|3470	3.75746	3	NA
1948501	AWRI1608	0.168887	0.168887	AHIQ01000058.1|4470	3.37257	3	NA
1949501	AWRI1608	0.139328	0.139328	AHIQ01000058.1|5470	3.30418	3	3
1950501	AWRI1608	0.0986877	0.0986877	AHIQ01000058.1|6470	3.2124	3	3
1951501	AWRI1608	0.114905	0.114905	AHIQ01000058.1|7470	3.24871	3	3
1952501	AWRI1608	0.0269894	0.0269894	AHIQ01000058.1|8470	3.05665	3	3
1953501	AWRI1608	-0.126956	-0.126956	AHIQ01000058.1|9470	2.74728	3	3
1954501	AWRI1608	-0.232697	-0.232697	AHIQ01000058.1|10470	2.55313	3	3
1955501	AWRI1608	-0.3535	-0.3535	AHIQ01000058.1|11470	2.34805	3	3
1956501	AWRI1608	-0.511683	-0.511683	AHIQ01000058.1|12470	2.10421	3	2
1957501	AWRI1608	-0.496799	-0.496799	AHIQ01000058.1|13470	2.12603	3	2
1958501	AWRI1608	-0.374503	-0.374503	AHIQ01000058.1|14470	2.31411	3	2
1959501	AWRI1608	-0.321733	-0.321733	AHIQ01000058.1|15470	2.40032	3	2
1960501	AWRI1608	-0.242119	-0.242119	AHIQ01000058.1|16470	2.53651	3	2
1961501	AWRI1608	-0.135298	-0.135298	AHIQ01000058.1|17470	2.73145	3	3
1962501	AWRI1608	-0.0661268	-0.0661268	AHIQ01000058.1|18470	2.8656	3	3
1963501	AWRI1608	-0.0199889	-0.0199889	AHIQ01000058.1|19470	2.95872	3	3
1964501	AWRI1608	-0.0471876	-0.0471876	AHIQ01000058.1|20470	2.90346	3	3
1965501	AWRI1608	-0.0254154	-0.0254154	AHIQ01000058.1|21470	2.94761	3	3
1966501	AWRI1608	-0.123527	-0.123527	AHIQ01000058.1|22470	2.75382	3	3
1967501	AWRI1608	-0.319005	-0.319005	AHIQ01000058.1|23470	2.40487	3	3
1968501	AWRI1608	-0.498632	-0.498632	AHIQ01000058.1|24470	2.12333	3	2
1969501	AWRI1608	-0.496914	-0.496914	AHIQ01000058.1|25470	2.12586	3	2
1970501	AWRI1608	-0.569007	-0.569007	AHIQ01000058.1|26470	2.02224	3	2
1971501	AWRI1608	-0.666719	-0.666719	AHIQ01000058.1|27470	1.88981	3	2
1972501	AWRI1608	-0.451742	-0.451742	AHIQ01000058.1|28470	2.19348	3	2
1973501	AWRI1608	-0.405375	-0.405375	AHIQ01000058.1|29470	2.26512	3	2
1974501	AWRI1608	-0.311655	-0.311655	AHIQ01000058.1|30470	2.41715	3	2
1975501	AWRI1608	-0.222101	-0.222101	AHIQ01000058.1|31470	2.57195	3	3
1976501	AWRI1608	0.0866498	0.0866498	AHIQ01000058.1|32470	3.1857	3	3
1977501	AWRI1608	0.131694	0.131694	AHIQ01000058.1|33470	3.28674	3	NA
1978501	AWRI1608	0.00734118	0.00734118	AHIQ01000058.1|34470	3.0153	3	NA
1979501	AWRI1608	NA	NA	NA	3	3	NA
1980501	AWRI1608	NA	NA	NA	3	3	NA
1981501	AWRI1608	NA	NA	NA	3	3	NA
1982501	AWRI1608	NA	NA	NA	3	3	NA
1983501	AWRI1608	NA	NA	NA	3	3	NA
1984501	AWRI1608	-0.211997	-0.211997	AHIQ01000059.1|3269	2.59002	3	NA
1985501	AWRI1608	-0.373952	-0.373952	AHIQ01000059.1|4269	2.315	3	NA
1986501	AWRI1608	-0.507716	-0.507716	AHIQ01000059.1|5269	2.11	3	2
1987501	AWRI1608	-0.58396	-0.58396	AHIQ01000059.1|6269	2.00139	3	2
1988501	AWRI1608	-0.815833	-0.815833	AHIQ01000059.1|7269	1.70424	3	2
1989501	AWRI1608	-0.716814	-0.716814	AHIQ01000059.1|8269	1.82532	3	2
1990501	AWRI1608	-0.675744	-0.675744	AHIQ01000059.1|9269	1.87803	3	2
1991501	AWRI1608	-0.566473	-0.566473	AHIQ01000059.1|10269	2.0258	3	2
1992501	AWRI1608	-0.434621	-0.434621	AHIQ01000059.1|11269	2.21966	3	2
1993501	AWRI1608	-0.245917	-0.245917	AHIQ01000059.1|12269	2.52984	3	2
1994501	AWRI1608	-0.215884	-0.215884	AHIQ01000059.1|13269	2.58306	3	2
1995501	AWRI1608	-0.16224	-0.16224	AHIQ01000059.1|14269	2.68091	3	3
1996501	AWRI1608	-0.031736	-0.031736	AHIQ01000059.1|15269	2.93473	3	3
1997501	AWRI1608	0.0209037	0.0209037	AHIQ01000059.1|16269	3.04378	3	3
1998501	AWRI1608	0.087561	0.087561	AHIQ01000059.1|17269	3.18772	3	3
1999501	AWRI1608	0.122475	0.122475	AHIQ01000059.1|18269	3.2658	3	3
2000501	AWRI1608	0.168267	0.168267	AHIQ01000059.1|19269	3.37112	3	3
[truncated: 36,017 more rows]
