# Supplementary material for: Insights into the Dekkera bruxellensis Genomic Landscape: Comparative Genomics Reveals Variations in Ploidy and Nutrient Utilisation Potential amongst Wine Isolates
Source: PLoS Genet. 2014 Feb 13;10(2):e1004161. doi: 10.1371/journal.pgen.1004161 (PMC3923673; doi:10.1371/journal.pgen.1004161)
Supplement: Dataset S6 — Annotation of AWRI1499 concatenated genome sequence. The start coordinates of each of the AWRI1499 contigs (listed by Genbank accession) within the concatenated sequence. (XLSX) [file pgen.1004161.s014.xlsx]

## Sheet: Sheet1
genbank_accession	start_base_pair
AHIQ01000001.1	1
AHIQ01000002.1	12138
AHIQ01000003.1	29305
AHIQ01000004.1	38248
AHIQ01000005.1	42183
AHIQ01000006.1	71332
AHIQ01000007.1	96498
AHIQ01000008.1	111898
AHIQ01000009.1	190960
AHIQ01000010.1	206613
AHIQ01000011.1	210407
AHIQ01000012.1	298514
AHIQ01000013.1	360281
AHIQ01000014.1	432986
AHIQ01000015.1	550304
AHIQ01000016.1	577085
AHIQ01000017.1	606266
AHIQ01000018.1	610060
AHIQ01000019.1	749522
AHIQ01000020.1	778589
AHIQ01000021.1	849830
AHIQ01000022.1	856457
AHIQ01000023.1	929501
AHIQ01000024.1	962494
AHIQ01000025.1	984507
AHIQ01000026.1	1028666
AHIQ01000027.1	1060266
AHIQ01000028.1	1091999
AHIQ01000029.1	1097904
AHIQ01000030.1	1126160
AHIQ01000031.1	1129881
AHIQ01000032.1	1149115
AHIQ01000033.1	1232506
AHIQ01000034.1	1300110
AHIQ01000035.1	1304656
AHIQ01000036.1	1323745
AHIQ01000037.1	1362679
AHIQ01000038.1	1520403
AHIQ01000039.1	1527799
AHIQ01000040.1	1544610
AHIQ01000041.1	1567457
AHIQ01000042.1	1575815
AHIQ01000043.1	1618885
AHIQ01000044.1	1623311
AHIQ01000045.1	1636049
AHIQ01000046.1	1650346
AHIQ01000047.1	1672929
AHIQ01000048.1	1684137
AHIQ01000049.1	1722415
AHIQ01000050.1	1758554
AHIQ01000051.1	1817419
AHIQ01000052.1	1819851
AHIQ01000053.1	1845794
AHIQ01000054.1	1868771
AHIQ01000055.1	1871482
AHIQ01000056.1	1897697
AHIQ01000057.1	1916758
AHIQ01000058.1	1944032
AHIQ01000059.1	1981233
AHIQ01000060.1	2127194
AHIQ01000061.1	2244345
AHIQ01000062.1	2313074
AHIQ01000063.1	2349140
AHIQ01000064.1	2376367
AHIQ01000065.1	2452925
AHIQ01000066.1	2550054
AHIQ01000067.1	2580931
AHIQ01000068.1	2586583
AHIQ01000069.1	2614555
AHIQ01000070.1	2690801
AHIQ01000071.1	2840432
AHIQ01000072.1	2875116
AHIQ01000073.1	2938764
AHIQ01000074.1	3025181
AHIQ01000075.1	3124275
AHIQ01000076.1	3168635
AHIQ01000077.1	3224806
AHIQ01000078.1	3304717
AHIQ01000079.1	3331235
AHIQ01000080.1	3447085
AHIQ01000081.1	3601201
AHIQ01000082.1	3634516
AHIQ01000083.1	3653100
AHIQ01000084.1	3801905
AHIQ01000085.1	3806531
AHIQ01000086.1	3910450
AHIQ01000087.1	3958328
AHIQ01000088.1	3960001
AHIQ01000089.1	3963556
AHIQ01000090.1	4125373
AHIQ01000091.1	4170985
AHIQ01000092.1	4215946
AHIQ01000093.1	4303626
AHIQ01000094.1	4382252
AHIQ01000095.1	4430303
AHIQ01000096.1	4478875
AHIQ01000097.1	4570142
AHIQ01000098.1	4571139
AHIQ01000099.1	4686859
AHIQ01000100.1	4715297
AHIQ01000101.1	4725367
AHIQ01000102.1	4826525
AHIQ01000103.1	4910644
AHIQ01000104.1	4951649
AHIQ01000105.1	4992374
AHIQ01000106.1	4996559
AHIQ01000107.1	5051412
AHIQ01000108.1	5118114
AHIQ01000109.1	5174116
AHIQ01000110.1	5205021
AHIQ01000111.1	5264166
AHIQ01000112.1	5279658
AHIQ01000113.1	5322579
AHIQ01000114.1	5389894
AHIQ01000115.1	5395222
AHIQ01000116.1	5419137
AHIQ01000117.1	5460345
AHIQ01000118.1	5484610
AHIQ01000119.1	5493868
AHIQ01000120.1	5501627
AHIQ01000121.1	5524925
AHIQ01000122.1	5567820
AHIQ01000123.1	5727022
AHIQ01000124.1	5745187
AHIQ01000125.1	5765095
AHIQ01000126.1	5786614
AHIQ01000127.1	5822411
AHIQ01000128.1	5916075
AHIQ01000129.1	5917180
AHIQ01000130.1	5968572
AHIQ01000131.1	5989052
AHIQ01000132.1	6073710
AHIQ01000133.1	6098824
AHIQ01000134.1	6106776
AHIQ01000135.1	6110352
AHIQ01000136.1	6280659
AHIQ01000137.1	6319129
AHIQ01000138.1	6339189
AHIQ01000139.1	6351353
AHIQ01000140.1	6398705
AHIQ01000141.1	6419243
AHIQ01000142.1	6427664
AHIQ01000143.1	6433440
AHIQ01000144.1	6451121
AHIQ01000145.1	6574080
AHIQ01000146.1	6619753
AHIQ01000147.1	6665930
AHIQ01000148.1	6674566
AHIQ01000149.1	6701306
AHIQ01000150.1	6732961
AHIQ01000151.1	6738514
AHIQ01000152.1	6759519
AHIQ01000153.1	6777420
AHIQ01000154.1	6788611
AHIQ01000155.1	6861808
AHIQ01000156.1	6864507
AHIQ01000157.1	6869284
AHIQ01000158.1	6954684
AHIQ01000159.1	6985678
AHIQ01000160.1	7011400
AHIQ01000161.1	7059143
AHIQ01000162.1	7114497
AHIQ01000163.1	7194163
AHIQ01000164.1	7251255
AHIQ01000165.1	7272137
AHIQ01000166.1	7319031
AHIQ01000167.1	7320381
AHIQ01000168.1	7337032
AHIQ01000169.1	7378057
AHIQ01000170.1	7429272
AHIQ01000171.1	7432602
AHIQ01000172.1	7479094
AHIQ01000173.1	7551025
AHIQ01000174.1	7587157
AHIQ01000175.1	7723442
AHIQ01000176.1	7737746
AHIQ01000177.1	7835983
AHIQ01000178.1	7867933
AHIQ01000179.1	7881704
AHIQ01000180.1	7994729
AHIQ01000181.1	8020379
AHIQ01000182.1	8086246
AHIQ01000183.1	8098216
AHIQ01000184.1	8143156
AHIQ01000185.1	8156683
AHIQ01000186.1	8166482
AHIQ01000187.1	8194082
AHIQ01000188.1	8211329
AHIQ01000189.1	8294200
AHIQ01000190.1	8310973
AHIQ01000191.1	8353464
AHIQ01000192.1	8388402
AHIQ01000193.1	8421896
AHIQ01000194.1	8423583
AHIQ01000195.1	8470684
AHIQ01000196.1	8557114
AHIQ01000197.1	8593155
AHIQ01000198.1	8647671
AHIQ01000199.1	8684923
AHIQ01000200.1	8713501
AHIQ01000201.1	8812149
AHIQ01000202.1	8850265
AHIQ01000203.1	8939668
AHIQ01000204.1	8981184
AHIQ01000205.1	9066243
AHIQ01000206.1	9108271
AHIQ01000207.1	9126683
AHIQ01000208.1	9187389
AHIQ01000209.1	9229594
AHIQ01000210.1	9295014
AHIQ01000211.1	9297267
AHIQ01000212.1	9415744
AHIQ01000213.1	9430958
AHIQ01000214.1	9522770
AHIQ01000215.1	9524296
AHIQ01000216.1	9584540
AHIQ01000217.1	9586296
AHIQ01000218.1	9627008
AHIQ01000219.1	9636319
AHIQ01000220.1	9746931
AHIQ01000221.1	9851307
AHIQ01000222.1	9951527
AHIQ01000223.1	10051396
AHIQ01000224.1	10060674
AHIQ01000225.1	10076512
AHIQ01000226.1	10149352
AHIQ01000227.1	10151926
AHIQ01000228.1	10158214
AHIQ01000229.1	10176402
AHIQ01000230.1	10246903
AHIQ01000231.1	10280134
AHIQ01000232.1	10317392
AHIQ01000233.1	10338354
AHIQ01000234.1	10428040
AHIQ01000235.1	10481336
AHIQ01000236.1	10517280
AHIQ01000237.1	10566677
AHIQ01000238.1	10567360
AHIQ01000239.1	10570835
AHIQ01000240.1	10605866
AHIQ01000241.1	10669622
AHIQ01000242.1	10690560
AHIQ01000243.1	10729057
AHIQ01000244.1	10774223
AHIQ01000245.1	10797365
AHIQ01000246.1	10852832
AHIQ01000247.1	10857127
AHIQ01000248.1	10869007
AHIQ01000249.1	10875054
AHIQ01000250.1	10922118
AHIQ01000251.1	10938051
AHIQ01000252.1	11017884
AHIQ01000253.1	11074545
AHIQ01000254.1	11076634
AHIQ01000255.1	11087552
AHIQ01000256.1	11090227
AHIQ01000257.1	11091890
AHIQ01000258.1	11168894
AHIQ01000259.1	11245514
AHIQ01000260.1	11318961
AHIQ01000261.1	11382770
AHIQ01000262.1	11447912
AHIQ01000263.1	11455527
AHIQ01000264.1	11513071
AHIQ01000265.1	11565457
AHIQ01000266.1	11575823
AHIQ01000267.1	11604598
AHIQ01000268.1	11619381
AHIQ01000269.1	11639277
AHIQ01000270.1	11648717
AHIQ01000271.1	11682586
AHIQ01000272.1	11684813
AHIQ01000273.1	11700141
AHIQ01000274.1	11760318
AHIQ01000275.1	11818926
AHIQ01000276.1	11850819
AHIQ01000277.1	11876462
AHIQ01000278.1	11903964
AHIQ01000279.1	11919935
AHIQ01000280.1	11933669
AHIQ01000281.1	11989373
AHIQ01000282.1	12005169
AHIQ01000283.1	12043352
AHIQ01000284.1	12092566
AHIQ01000285.1	12116646
AHIQ01000286.1	12142263
AHIQ01000287.1	12188208
AHIQ01000288.1	12198098
AHIQ01000289.1	12216012
AHIQ01000290.1	12218604
AHIQ01000291.1	12220197
AHIQ01000292.1	12222455
AHIQ01000293.1	12230617
AHIQ01000294.1	12233151
AHIQ01000295.1	12236913
AHIQ01000296.1	12245061
AHIQ01000297.1	12249243
AHIQ01000298.1	12250966
AHIQ01000299.1	12252153
AHIQ01000300.1	12278856
AHIQ01000301.1	12325493
AHIQ01000302.1	12358212
AHIQ01000303.1	12390354
AHIQ01000304.1	12421897
AHIQ01000305.1	12451536
AHIQ01000306.1	12479401
AHIQ01000307.1	12501770
AHIQ01000308.1	12506147
AHIQ01000309.1	12530033
AHIQ01000310.1	12547396
AHIQ01000311.1	12552378
AHIQ01000312.1	12559227
AHIQ01000313.1	12568659
AHIQ01000314.1	12570646
AHIQ01000315.1	12581544
AHIQ01000316.1	12588430
AHIQ01000317.1	12592163
AHIQ01000318.1	12602670
AHIQ01000319.1	12604871
AHIQ01000320.1	12605871
AHIQ01000321.1	12608047
AHIQ01000322.1	12614295
AHIQ01000323.1	12617268
