# Supplementary material for: Insights into the Dekkera bruxellensis Genomic Landscape: Comparative Genomics Reveals Variations in Ploidy and Nutrient Utilisation Potential amongst Wine Isolates
Source: PubMed Central journal article supplement (PMC3923673; doi:10.1371/journal.pgen.1004161), 2014-02-13

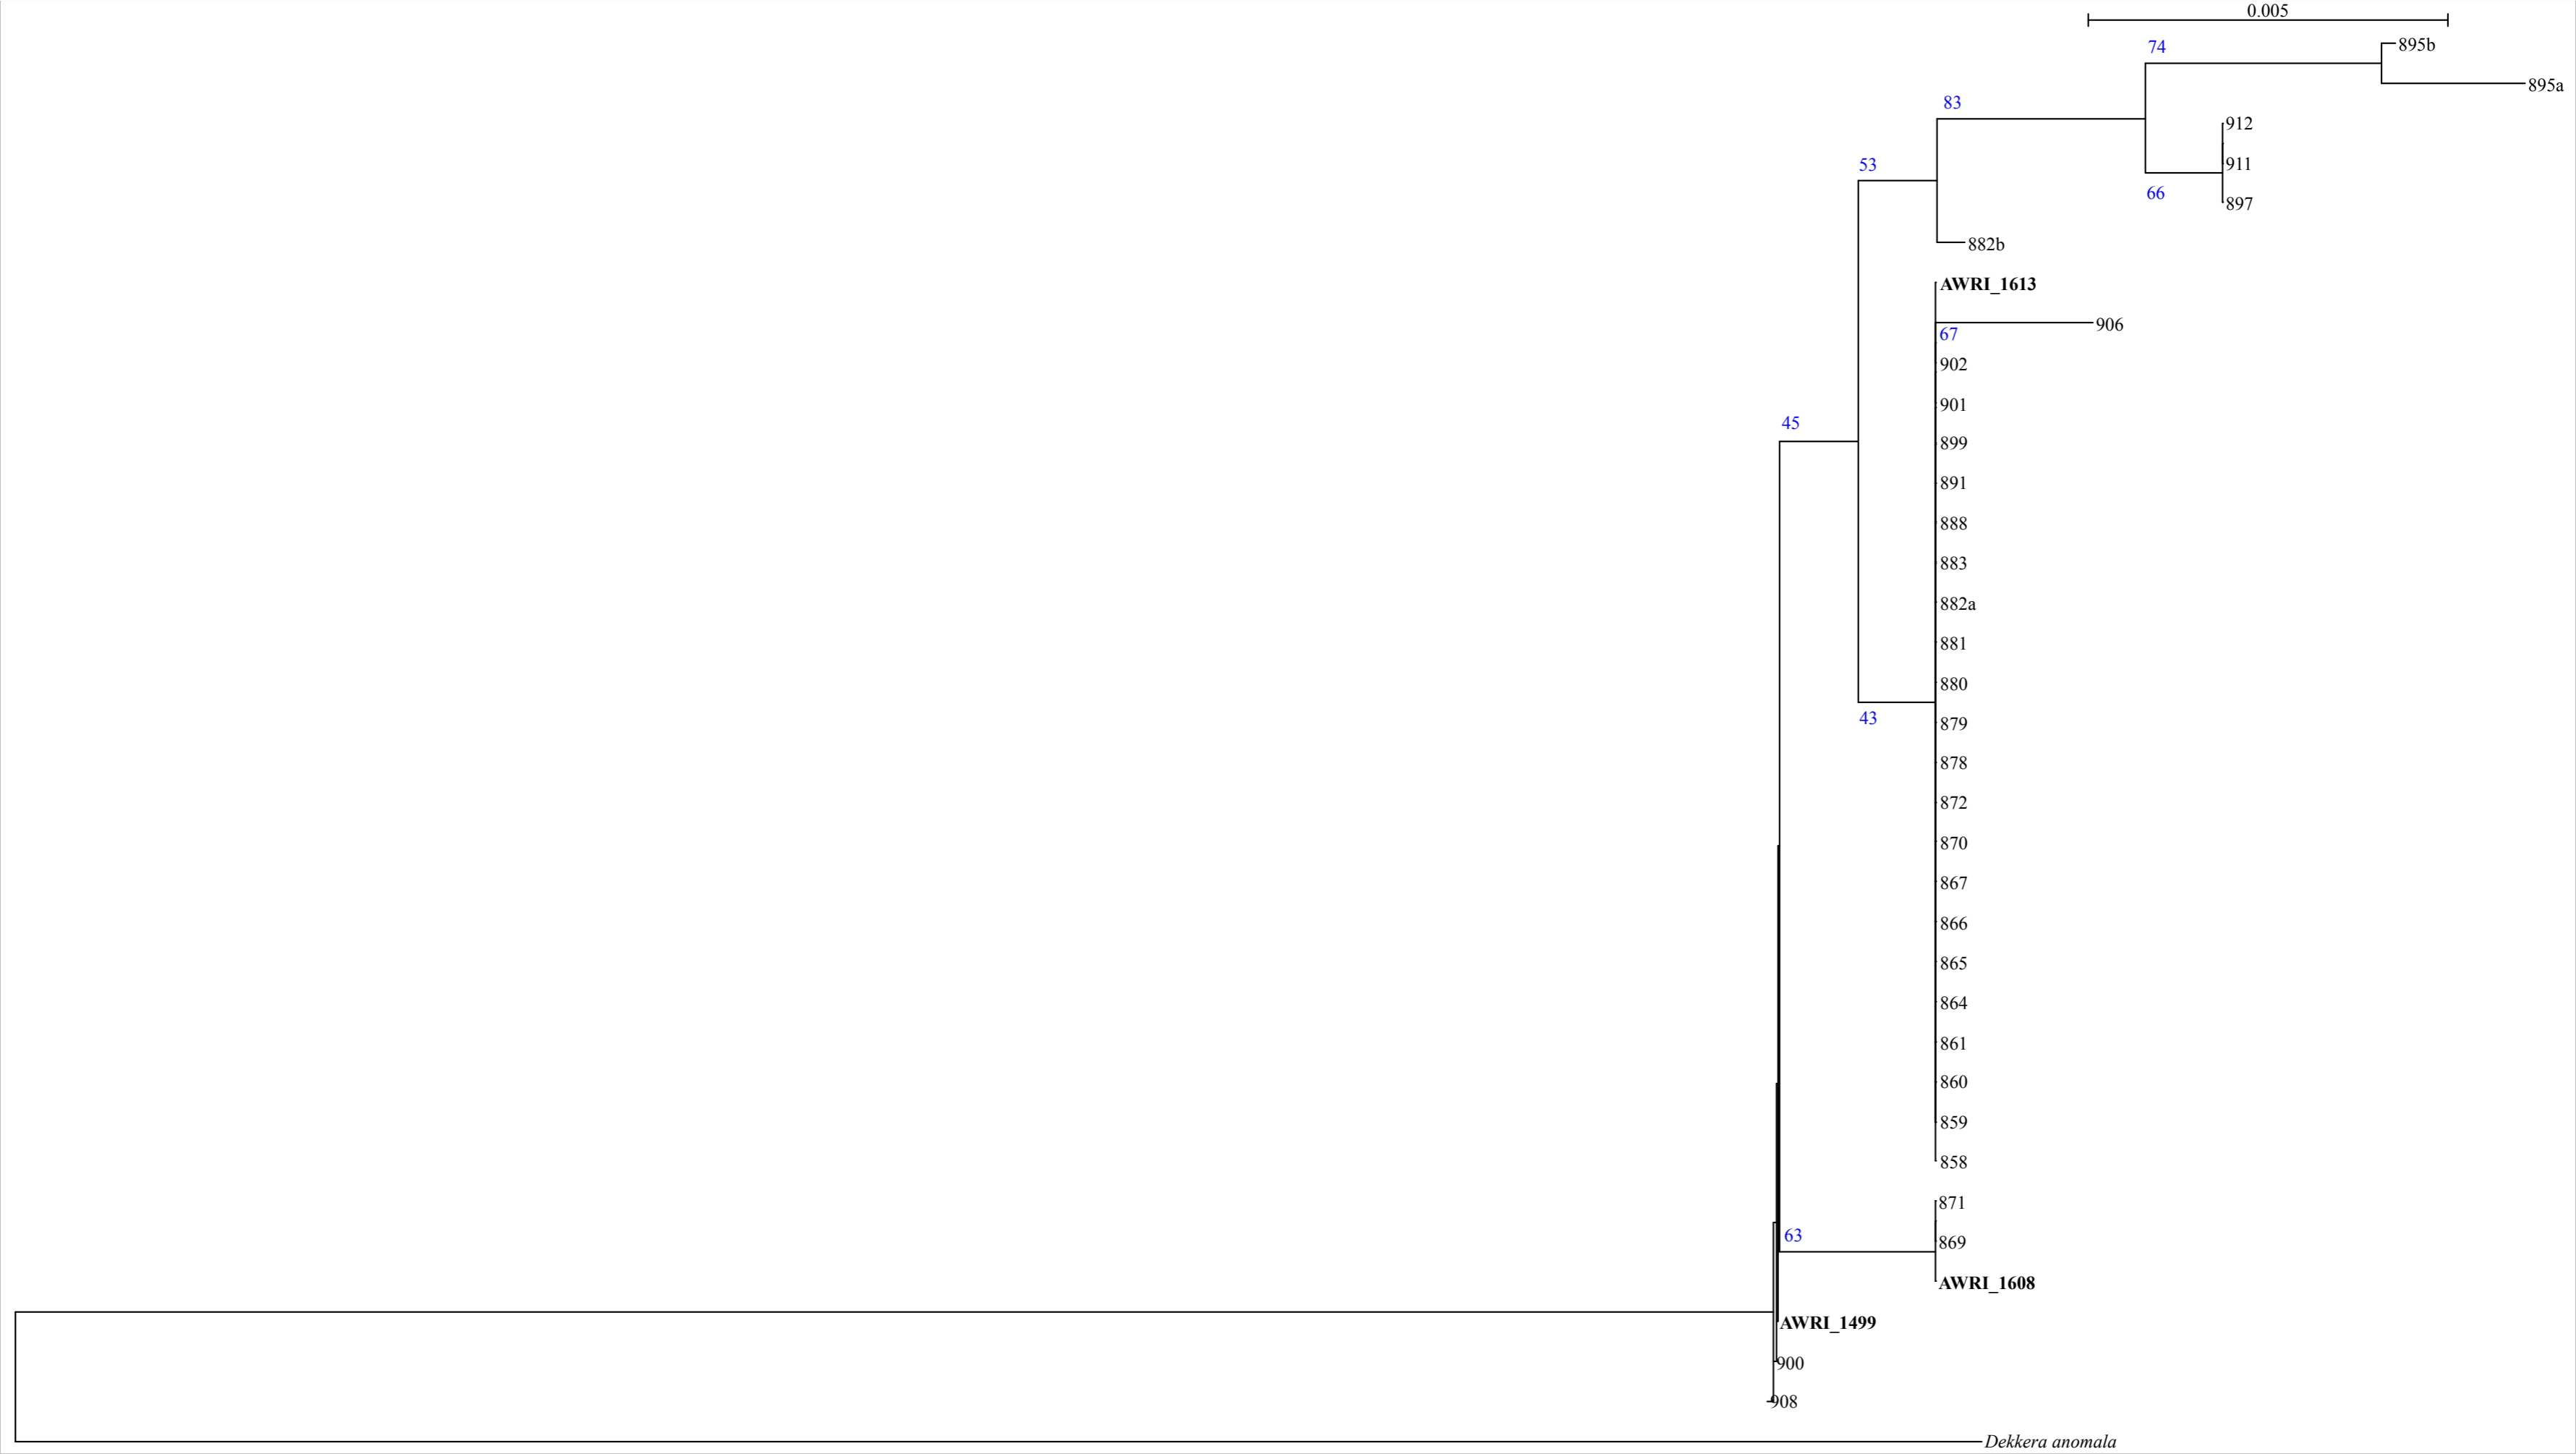

Supplement: pgen.1004161.s004.pdf [file pgen.1004161.s004.pdf]
