# Supplementary material for: Insights into the Dekkera bruxellensis Genomic Landscape: Comparative Genomics Reveals Variations in Ploidy and Nutrient Utilisation Potential amongst Wine Isolates
Source: PubMed Central journal article supplement (PMC3923673; doi:10.1371/journal.pgen.1004161), 2014-02-13

0.2

### AWRI1499\_1134

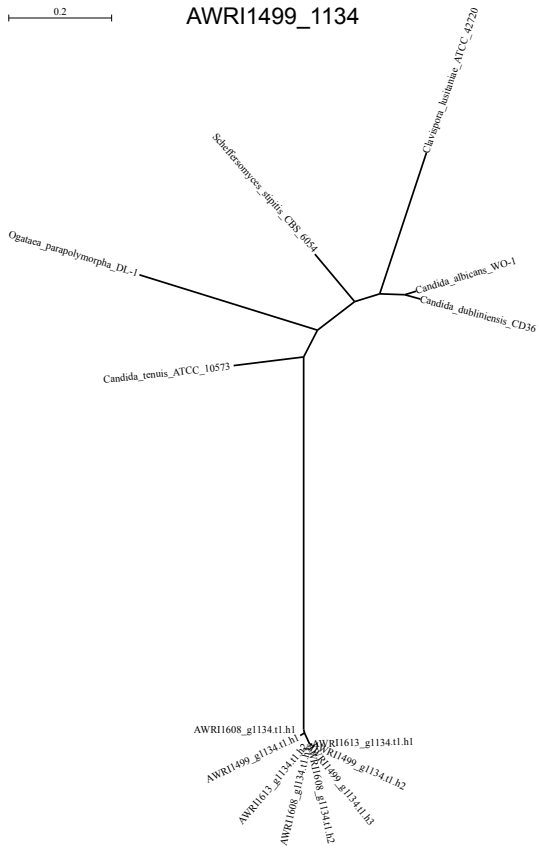

0.2

### AWRI1499\_1822

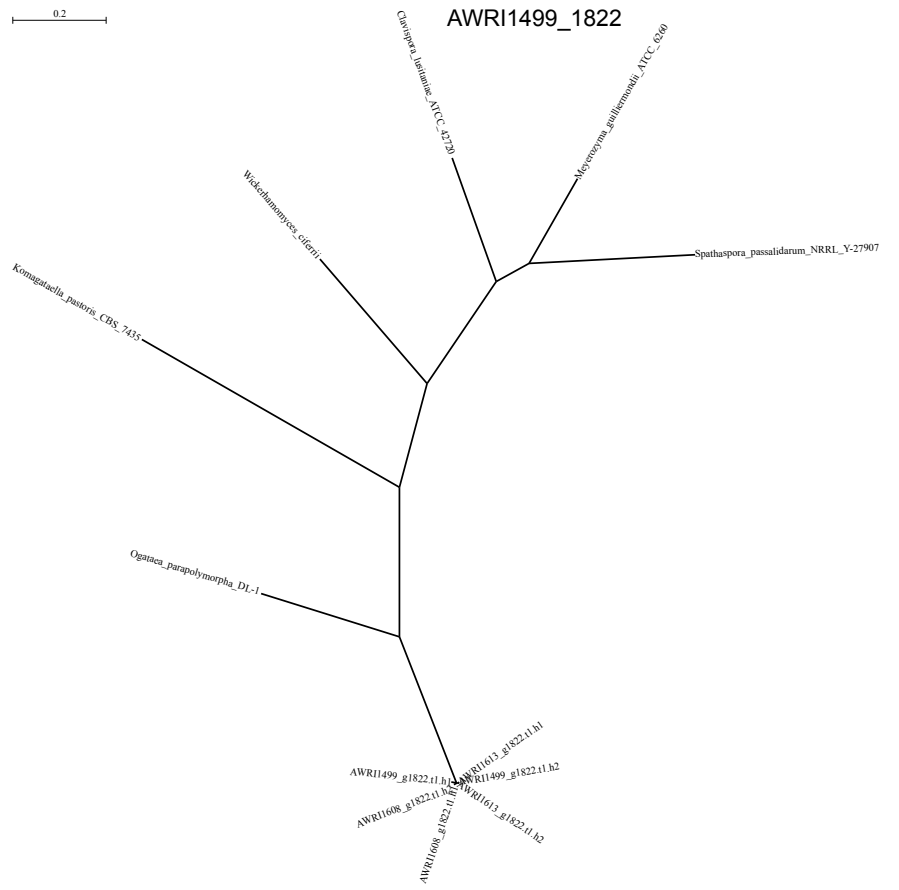

0.2

### AWRI1499\_4264

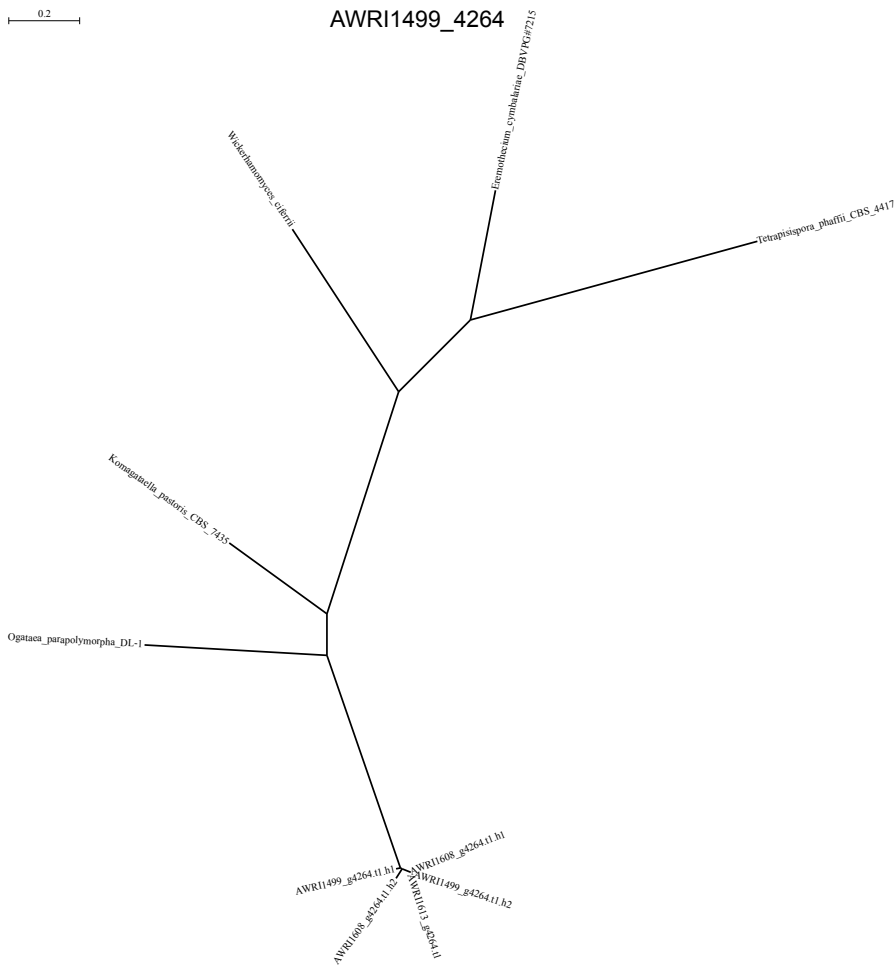

Supplement: pgen.1004161.s006.pdf [file pgen.1004161.s006.pdf]
