# Supplementary material for: Insights into the Dekkera bruxellensis Genomic Landscape: Comparative Genomics Reveals Variations in Ploidy and Nutrient Utilisation Potential amongst Wine Isolates
Source: PubMed Central journal article supplement (PMC3923673; doi:10.1371/journal.pgen.1004161), 2014-02-13

**A**

PhyML ln(L)=-35189.5 1545 sites LG 4 rate classes

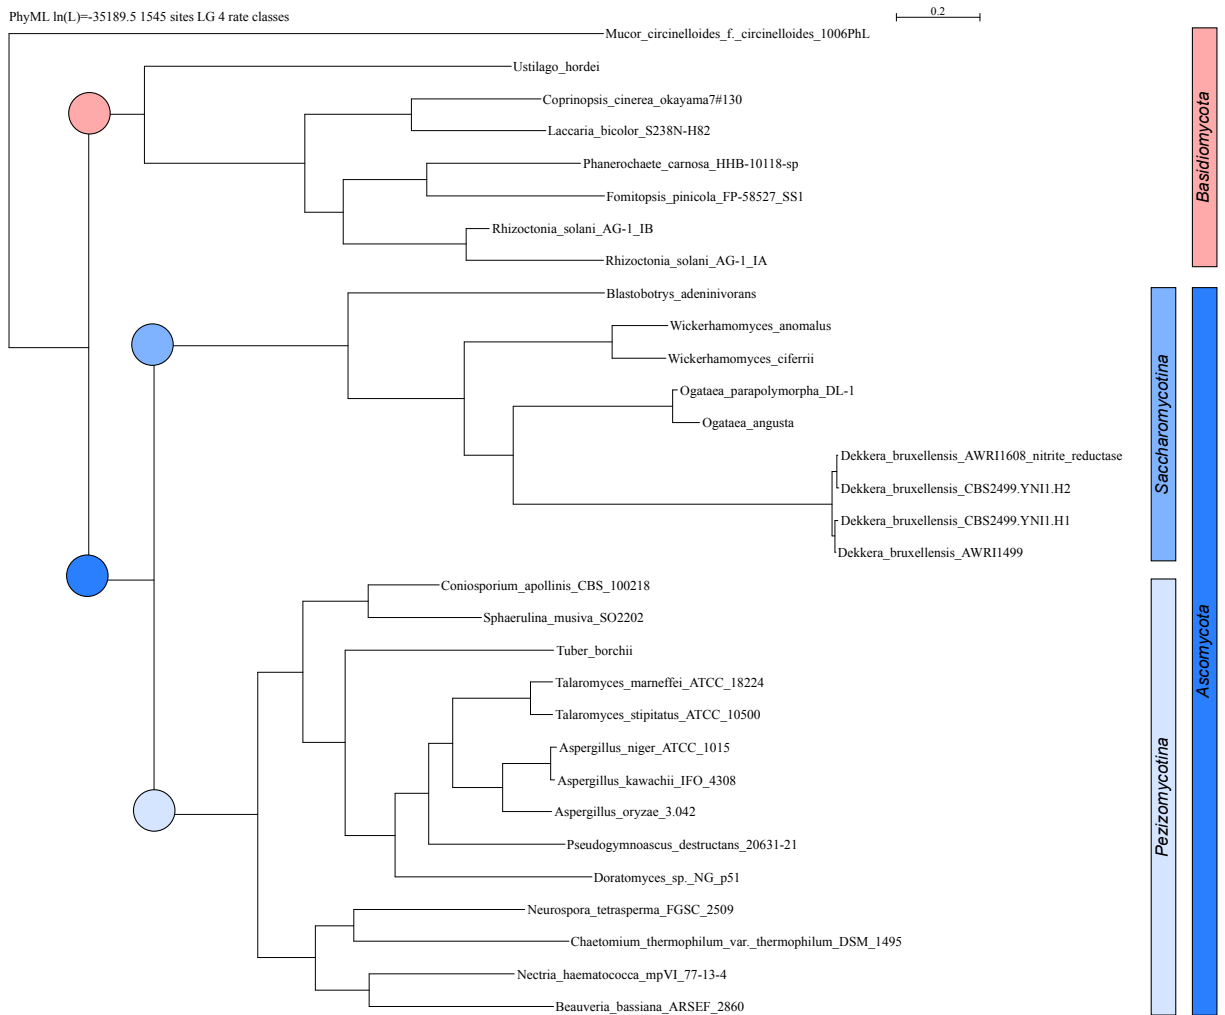**B**

PhyML ln(L)=-35845.6 1932 sites LG 4 rate classes

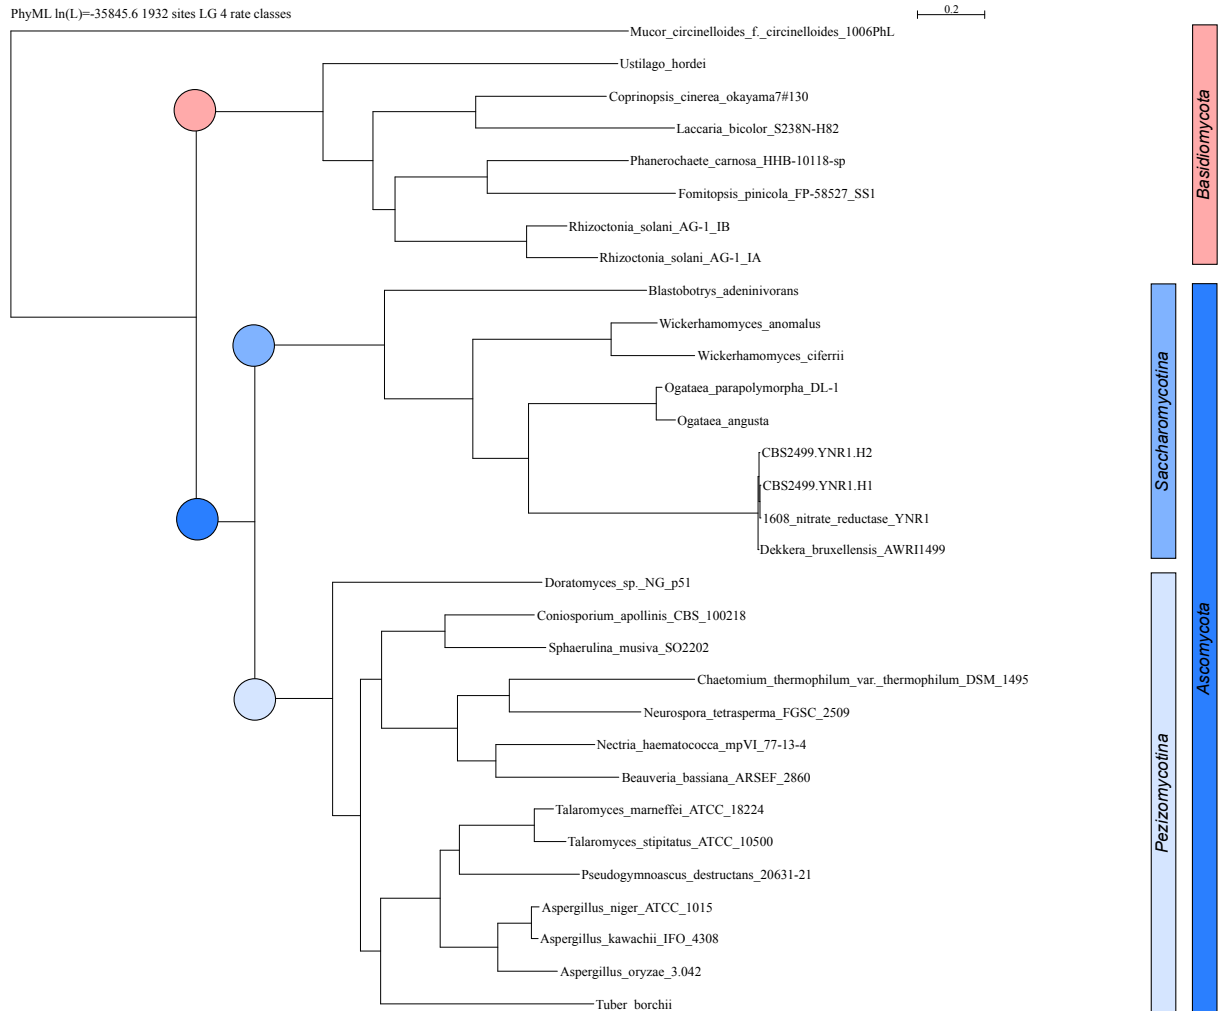

Supplement: pgen.1004161.s007.pdf [file pgen.1004161.s007.pdf]
